# Supplementary material for: Public opinion about solar radiation management: A cross-cultural study in 20 countries around the world
Source: Springer Nature journal article supplement (doi:10.1007/s10584-024-03708-3), 2024-03-29
Supplement: MOESM1 [file 10584_2024_3708_MOESM1_ESM.pdf]

## **Supplementary information A of the paper: Public opinion about solar radiation management: A cross-cultural study in 20 countries around the world**

### **Additional information on the country selection, the country clusters, the data collection procedure, samples, sensitivity analyses, and participants**

#### **Content of Supplementary information A:**

- Table A1. Overview of countries from which researchers were invited for collaboration, countries included in the final sample, reasons for drop out, as well as climate change vulnerability per country
- Supplementary note A1: Information on country clusters
- Table A2. Overview of clustering dimensions, resulting clusters, and countries per cluster
- Table A3. Overview of sampling approaches per sample
- Supplementary note A2: Information on data exclusion
- Table A4. Sample sizes before and after data cleaning
- Table A5. Demographics of the student samples
- Table A6. Demographics of the general public samples and the respective population
- Table A7. Self-reported prior knowledge about SRM among students and the general public
- Supplementary note A3: Information on sensitivity analyses
- Table A8. Overview of sample sizes and results from sensitivity power analysis

**Table A1.** Overview of countries from which researchers were invited for collaboration, countries included in the final sample, reasons for drop out, as well as climate change vulnerability per country

| Continent         | Country      | Contact <sup>1</sup> | Part of final sample | Reason for drop out      | Climate change vulnerability <sup>2</sup> |
|-------------------|--------------|----------------------|----------------------|--------------------------|-------------------------------------------|
| North America     | Canada       | Direct               | No                   | Sample size not achieved | Very low                                  |
|                   | Mexico       | Direct               | Yes                  | --                       | Medium                                    |
|                   | USA          | Direct               | Yes                  | --                       | Low to very low                           |
| South America     | Argentina    | Indirect             | Yes                  | --                       | Low                                       |
|                   | Brazil       | Indirect             | Yes                  | --                       | Low                                       |
|                   | Chile        | Indirect             | No                   | Sample size not achieved | Low                                       |
| Africa            | Ethiopia     | Direct               | No                   | Invitation declined      | Very high                                 |
|                   | Kenya        | Indirect             | No                   | Sample size not achieved | Very high                                 |
|                   | Malawi       | Indirect             | No                   | Invitation declined      | Very high                                 |
|                   | Nigeria      | Indirect             | Yes                  | --                       | Very high                                 |
|                   | South-Africa | Direct               | No                   | Invitation declined      | High to medium                            |
| Australia/Oceania | Australia    | Direct               | Yes                  | --                       | Very low                                  |
|                   | New Zealand  | Direct               | No                   | Invitation declined      | Very low                                  |
| Asia              | China        | Direct               | Yes                  | --                       | Medium                                    |
|                   | India        | Direct               | No                   | Invitation declined      | High                                      |
|                   | Iran         | Indirect             | Yes                  | --                       | Medium                                    |
|                   | Japan        | Direct               | No                   | Invitation declined      | Very low                                  |
|                   | Kazakhstan   | Indirect             | Yes                  | --                       | Very low to low                           |
|                   | Lebanon      | Indirect             | No                   | Data quality issues      | High to very high                         |
|                   | Singapore    | Direct               | No                   | Invitation declined      | Very low                                  |
|                   | Taiwan       | Direct               | Yes                  | --                       | Medium                                    |
| Eurasia           | Russia       | Direct               | Yes                  | --                       | Low                                       |
|                   | Turkey       | Indirect             | Yes                  | --                       | Medium                                    |
| Europe            | Ireland      | Direct               | Yes                  | --                       | Very low                                  |
|                   | Italy        | Direct               | Yes                  | --                       | Very low                                  |
|                   | Netherlands  | Core team            | Yes                  | --                       | Very low                                  |
|                   | Norway       | Direct               | Yes                  | --                       | Very low                                  |
|                   | Portugal     | Direct               | Yes                  | --                       | Very low                                  |
|                   | Spain        | Direct               | Yes                  | --                       | Very low                                  |
|                   | Switzerland  | Direct               | Yes                  | --                       | Very low                                  |
|                   | UK           | Direct               | Yes                  | --                       | Very low                                  |

*Note.* <sup>1</sup> Contacted teams where either direct contacts of the Dutch core team (direct) or indirect contacts (indirect), that is, the teams were proposed by direct contacts of the Dutch core team. <sup>2</sup> Based on Figure 7.2. of the IPCC report 'Climate Change 2022: Impacts, Adaptation and Vulnerability' (IPCC, 2022).

## Supplementary note A1: Information on country clusters

We grouped the countries along two dimensions: (a) Global North versus Global South (Solarz, 2019) and (b) ‘WEIRD’ versus ‘non-WEIRD’ (Henrich et al., 2010). Following conventions of the United Nations, we considered all member states of the Group of 77 + China as part of the Global South and all others as part of the Global North (The Group of 77, n.a.). It is worth noting that Mexico was a founding member of the Group of 77 in 1964 (The Group of 77, 1964) but left the group in 1994 when joining the OECD (Fonseca, 2023). While in 2023, Mexico voiced its aim to re-joining the Group of 77 + China (Fonseca, 2023), at the time of publication, it was not (yet) relisted as a member state (The Group of 77, n.a.). More importantly, when data were collected, it was not a member state of the Group of 77 + China. When assigning countries to the ‘WEIRD’ versus ‘non-WEIRD’ group of countries, we could not follow any such conventions but had to decide on an assignment rule. We followed a very strict rule and assigned only those countries to the group of ‘WEIRD’ countries that meet all of the ‘WEIRD’ criteria, that is, countries that are *Western and Educated and Industrialised and Rich and Democratic*. Any country that does not meet at least one of these criteria was assigned to the group of ‘non-WEIRD’ countries.

The combination of the two dimensions resulted in three clusters (see Table A2): (a) ‘WEIRD’ countries from the Global North (hereinafter referred to as the ‘WEIRD’ Global North), (b) ‘non-WEIRD’ countries from the Global North (hereinafter referred to as the ‘non-WEIRD’ Global North), and (c) ‘non-WEIRD’ countries from the Global South (hereinafter referred to as the Global South). The fourth theoretically possible cluster of ‘WEIRD’ countries from the Global South does not emerge as all countries from the Global South, both in our sample and beyond, can be considered ‘non-WEIRD’.

**Table A2.** Overview of clustering dimensions, resulting clusters, and countries per cluster

| Dimension 2: ‘WEIRD’<br>vs. ‘non-WEIRD’ | Dimension 1: Global North versus Global South |              |
|-----------------------------------------|-----------------------------------------------|--------------|
|                                         | Global North                                  | Global South |
| ‘WEIRD’                                 | ‘WEIRD’ Global North                          | n.a.         |
|                                         | Countries:                                    |              |
|                                         | Australia                                     |              |
|                                         | Ireland                                       |              |
|                                         | Italy                                         |              |
|                                         | Netherlands                                   |              |
|                                         | Norway                                        |              |
|                                         | Portugal                                      |              |
|                                         | Spain                                         |              |
|                                         | Switzerland                                   |              |
|                                         | UK                                            |              |
|                                         | USA                                           |              |
| ‘Non-WEIRD’                             | ‘Non-WEIRD’ Global North                      | Global South |
|                                         | Countries:                                    | Countries:   |
|                                         | Kazakhstan                                    | Argentina    |
|                                         | Mexico                                        | Brazil       |
|                                         | Russia                                        | China        |
|                                         | Taiwan                                        | Iran         |
|                                         | Turkey                                        | Nigeria      |

*Note.* n.a. = not applicable: All countries from the Global South, within our sample and beyond, are ‘non-WEIRD’.

**Table A3.** Overview of sampling approaches per sample

| Cluster                     | Country     | Data collection time | Students                                   |                            | General public                |         |
|-----------------------------|-------------|----------------------|--------------------------------------------|----------------------------|-------------------------------|---------|
|                             |             |                      | Recruitment                                | Reward                     | Recruitment                   | Reward  |
| Global South                | Argentina   | Spring               | Email lists, social media                  | None                       | --                            | --      |
|                             | Brazil      | Spring/autumn        | Email lists                                | None                       | --                            | --      |
|                             | China       | Spring               | Ads in lectures                            | None                       | --                            | --      |
|                             | Iran        | Spring/autumn        | Ads in lectures                            | None                       | Snowball                      | None    |
|                             | Nigeria     | Spring               | Social media                               | Internet credit            | --                            | --      |
| 'Non-WEIRD'<br>Global North | Kazakhstan  | Spring/autumn        | Ads in lectures                            | None                       | Flyers                        | None    |
|                             | Mexico      | Spring               | Ads in lectures                            | None                       | --                            | --      |
|                             | Russia      | Spring/autumn        | Ads in lectures                            | None                       | --                            | --      |
|                             | Taiwan      | Spring               | Student panel                              | Course credit              | Social media                  | Lottery |
|                             | Turkey      | Spring               | Student panel                              | Course credit              | --                            | --      |
| 'WEIRD'<br>Global North     | Australia   | Spring/autumn        | Student panel                              | Course credit              | --                            | --      |
|                             | Ireland     | Spring/autumn        | External panel service                     | Cash token                 | External panel service        | Cash    |
|                             | Italy       | Spring               | Ads in lectures                            | None                       | Snowball                      | None    |
|                             | Netherlands | Spring/autumn        | Ads in lectures, flyers, and student panel | Lottery or course credits  | External panel service        | Lottery |
|                             | Norway      | Spring               | Ads in lectures and social media           | Lottery                    | External panel service        | Lottery |
|                             | Portugal    | Spring               | --                                         | --                         | External panel service        | Cash    |
|                             | Spain       | Spring               | Ads in lectures                            | None                       | Snowball                      | None    |
|                             | Switzerland | Spring               | Email lists, student panel                 | Lottery                    | Internal panel and online ads | Lottery |
|                             | UK          | Spring               | Student panel and external panel service   | Course credits and voucher | External panel service        | Voucher |
|                             | USA         | Spring/autumn        | Ads in lectures and email lists            | None                       | External panel service        | Cash    |

**Supplementary note A2: Information on data exclusion**

A total of 5,025 students and 2,597 members of the general public completed the questionnaire. We excluded 387 student participants (8%) and 282 participants from the general public (11%) because of unreliable data (i.e. very short response times, straightlining, and random answers to open questions). Responses of another 55 student participants (1%) and 67 participants from the general public (2%) were removed because of incomplete data.

**Table A4.** Sample sizes before and after data cleaning

| Cluster                     | Sample         | Initial sample size | Unreliable data <sup>1</sup> | Incomplete data | Final sample |                              |
|-----------------------------|----------------|---------------------|------------------------------|-----------------|--------------|------------------------------|
|                             |                |                     |                              |                 | Sample size  | Percentage of initial sample |
|                             | Students       |                     |                              |                 |              |                              |
| Global South                | Argentina      | 212                 | 1                            | 1               | 210          | 99%                          |
|                             | Brazil         | 216                 | 3                            | 3               | 210          | 97%                          |
|                             | China          | 236                 | 46                           | 3               | 187          | 79%                          |
|                             | Iran           | 223                 | 22                           | 8               | 193          | 87%                          |
|                             | Nigeria        | 217                 | 33                           | 9               | 175          | 81%                          |
| 'Non-WEIRD'<br>Global North | Kazakhstan     | 238                 | 67                           | 11              | 160          | 67%                          |
|                             | Mexico         | 220                 | 10                           | 2               | 208          | 95%                          |
|                             | Russia         | 223                 | 1                            | 5               | 217          | 97%                          |
|                             | Taiwan         | 301                 | 38                           | 3               | 260          | 86%                          |
|                             | Turkey         | 422                 | 10                           | 2               | 410          | 97%                          |
| 'WEIRD' Global<br>North     | Australia      | 120                 | 6                            | 0               | 114          | 95%                          |
|                             | Ireland        | 140                 | 1                            | 0               | 139          | 99%                          |
|                             | Italy          | 213                 | 37                           | 3               | 173          | 81%                          |
|                             | Netherlands    | 214                 | 3                            | 0               | 211          | 99%                          |
|                             | Norway         | 449                 | 6                            | 2               | 441          | 98%                          |
|                             | Spain          | 208                 | 9                            | 1               | 198          | 95%                          |
|                             | Switzerland    | 226                 | 4                            | 0               | 222          | 98%                          |
|                             | UK             | 208                 | 13                           | 1               | 194          | 93%                          |
|                             | USA            | 739                 | 77                           | 1               | 661          | 89%                          |
|                             | Full sample    |                     | 5,025                        | 387             | 55           | 4,583                        |
|                             | General public |                     |                              |                 |              |                              |
| Global South                | Iran           | 211                 | 28                           | 13              | 170          | 81%                          |
| 'Non-WEIRD'<br>Global North | Kazakhstan     | 204                 | 42                           | 21              | 141          | 69%                          |
|                             | Taiwan         | 266                 | 30                           | 4               | 232          | 87%                          |
| 'WEIRD' Global<br>North     | Ireland        | 192                 | 1                            | 0               | 191          | 99%                          |
|                             | Italy          | 216                 | 34                           | 14              | 168          | 78%                          |
|                             | Netherlands    | 269                 | 6                            | 1               | 262          | 97%                          |
|                             | Norway         | 211                 | 2                            | 2               | 207          | 98%                          |
|                             | Portugal       | 205                 | 38                           | 0               | 167          | 81%                          |
|                             | Spain          | 208                 | 8                            | 5               | 195          | 94%                          |
|                             | Switzerland    | 99                  | 2                            | 1               | 96           | 97%                          |
|                             | UK             | 210                 | 21                           | 2               | 187          | 89%                          |
| USA                         | 306            | 70                  | 4                            | 232             | 76%          |                              |
| Full sample                 |                | 2,597               | 282                          | 67              | 2,248        | 87%                          |

Note. <sup>1</sup> Very short response times, straightlining, and random answers to open questions.

**Table A5.** Demographics of the student samples

| Cluster                     | Sample      | <i>N</i> | Gender |       |               | Age      |           | Study subject (students could be enrolled in multiple subjects) |                                |                           |                       |       |
|-----------------------------|-------------|----------|--------|-------|---------------|----------|-----------|-----------------------------------------------------------------|--------------------------------|---------------------------|-----------------------|-------|
|                             |             |          | Female | Male  | Not specified | <i>M</i> | <i>SD</i> | Social sciences & humanities                                    | Engineering & natural sciences | Medical & health sciences | Agricultural sciences | Other |
| Global South                | Argentina   | 210      | 83.3%  | 15.3% | 1.4%          | 23.94    | 5.55      | 81.3%                                                           | 12.9%                          | 8.6%                      | 1.0%                  | 1.4%  |
|                             | Brazil      | 210      | 63.8%  | 36.2% | 0.0%          | 27.34    | 7.69      | 44.0%                                                           | 19.1%                          | 41.1%                     | 0.0%                  | 0.5%  |
|                             | China       | 187      | 70.4%  | 26.3% | 3.2%          | 21.46    | 1.55      | 80.1%                                                           | 11.8%                          | 1.1%                      | 6.5%                  | 0.0%  |
|                             | Iran        | 193      | 64.2%  | 35.8% | 0.0%          | 23.57    | 10.64     | 16.1%                                                           | 63.2%                          | 17.6%                     | 0.0%                  | 5.2%  |
|                             | Nigeria     | 175      | 62.6%  | 30.5% | 6.9%          | 21.42    | 3.74      | 94.8%                                                           | 4.6%                           | 1.1%                      | 0.0%                  | 0.0%  |
| 'Non-WEIRD'<br>Global North | Kazakhstan  | 160      | 70.6%  | 27.5% | 1.9%          | 20.91    | 4.33      | 62.5%                                                           | 45.0%                          | 4.4%                      | 4.4%                  | 1.9%  |
|                             | Mexico      | 208      | 76.9%  | 22.6% | 0.5%          | 21.52    | 2.90      | 98.1%                                                           | 0.5%                           | 3.4%                      | 0.0%                  | 0.0%  |
|                             | Russia      | 217      | 72.4%  | 24.4% | 3.2%          | 21.80    | 4.52      | 77.6%                                                           | 23.3%                          | 12.9%                     | 0.5%                  | 0.5%  |
|                             | Taiwan      | 260      | 59.2%  | 40.4% | 0.4%          | 23.24    | 7.08      | 55.0%                                                           | 44.2%                          | 6.2%                      | 1.5%                  | 1.5%  |
|                             | Turkey      | 410      | 56.6%  | 42.2% | 1.2%          | 21.41    | 2.22      | 75.1%                                                           | 24.6%                          | 0.0%                      | 0.0%                  | 0.5%  |
| 'WEIRD'<br>Global North     | Australia   | 114      | 68.4%  | 29.8% | 1.8%          | 19.72    | 2.58      | 55.3%                                                           | 21.9%                          | 33.3%                     | 0.0%                  | 0.0%  |
|                             | Ireland     | 139      | 55.4%  | 40.3% | 4.3%          | 24.04    | 7.33      | 43.7%                                                           | 40.8%                          | 13.6%                     | 3.9%                  | 4.9%  |
|                             | Italy       | 173      | 52.6%  | 45.1% | 2.3%          | 24.11    | 6.34      | 52.9%                                                           | 30.8%                          | 5.8%                      | 6.4%                  | 6.4%  |
|                             | Netherlands | 211      | 72.5%  | 27.5% | 0.0%          | 20.65    | 2.89      | 90.0%                                                           | 9.0%                           | 1.9%                      | 0.0%                  | 1.4%  |
|                             | Norway      | 441      | 65.1%  | 34.9% | 0.0%          | 24.87    | 5.92      | 66.2%                                                           | 29.0%                          | 8.4%                      | 0.5%                  | 0.7%  |
|                             | Spain       | 198      | 80.8%  | 19.2% | 0.0%          | 21.32    | 3.59      | 86.4%                                                           | 3.0%                           | 12.6%                     | 0.5%                  | 0.0%  |
|                             | Switzerland | 222      | 73.0%  | 27.0% | 0.0%          | 24.87    | 5.73      | 16.3%                                                           | 45.7%                          | 28.1%                     | 17.2%                 | 3.6%  |
|                             | UK          | 194      | 74.2%  | 23.7% | 2.1%          | 20.89    | 3.95      | 64.8%                                                           | 25.4%                          | 10.9%                     | 2.6%                  | 3.6%  |
| USA                         | 661         | 50.2%    | 48.7%  | 1.1%  | 19.19         | 3.92     | 42.5%     | 43.4%                                                           | 15.9%                          | 4.8%                      | 2.3%                  |       |
| Full sample                 |             | 4,583    | 64.9%  | 33.8% | 1.3%          | 22.26    | 5.60      | 62.2%                                                           | 28.0%                          | 11.4%                     | 2.6%                  | 1.7%  |

**Table A6.** Demographics of the general public samples and the respective population

| Cluster                     | Country     |                | Gender |        | Not specified | Age   |        |        |       |        | Level of education |        |             |       |
|-----------------------------|-------------|----------------|--------|--------|---------------|-------|--------|--------|-------|--------|--------------------|--------|-------------|-------|
|                             |             |                | Female | Male   |               | 16-29 | 30-39  | 40-49  | 50-59 | 60-69  | ≥ 70               | Low    | Me-<br>dium | High  |
| Global South                | Iran        | Sample (N=170) | 62.4%  | 36.5%  | 1.2%          | 71.1% | 15.1%  | 7.2%   | 4.2%  | 0.6%   | 1.8%               | 3.5%   | 45.9%       | 50.6% |
|                             |             | Population     | 49.3%  | 50.7%  | n.a.          | 29.2% | 27.2%  | 18.0%  | 12.7% | 7.4%   | 5.5%               | 58.8%  | 28.2%       | 13.0% |
|                             |             | Bias           | 13.1%  | -14.2% |               | 41.9% | -12.1% | -10.8% | -8.5% | -6.8%  | -3.7%              | -55.3% | 17.7%       | 37.6% |
| 'Non-WEIRD'<br>Global North | Kazakhstan  | Sample (N=141) | 73.0%  | 24.1%  | 2.8%          |       |        | 97.8%  |       | 2.2%   |                    | 2.1%   | 14.9%       | 83.0% |
|                             |             | Population     | 52.8%  | 47.2%  | n.a.          |       |        | 84.3%  |       | 15.7%  |                    |        | n.a.        |       |
|                             |             | Bias           | 20.2%  | -23.1% |               |       |        | 13.5%  |       | -13.5% |                    |        |             |       |
|                             | Taiwan      | Sample (N=232) | 53.9%  | 44.4%  | 1.7%          | 29.6% | 22.6%  | 22.2%  | 21.3% | 4.3%   | 0%                 | 1.3%   | 22.9%       | 75.8% |
|                             |             | Population     | 50.9%  | 49.1%  | n.a.          | 16.2% | 18.4%  | 19.4%  | 18.8% | 15.7%  | 11.5%              | 27.9%  | 41.3%       | 30.8% |
|                             |             | Bias           | 3.0%   | -4.7%  |               | 13.4% | 4.2%   | 2.8%   | 2.5%  | -11.4% | -11.5%             | -26.6% | -18.4%      | 45.0% |
| 'WEIRD'<br>Global North     | Ireland     | Sample (N=191) | 52.9%  | 46.1%  | 1.0%          | 28.8% | 39.8%  | 17.8%  | 8.4%  | 5.2%   | 0%                 | 4.7%   | 25.7%       | 69.6% |
|                             |             | Population     | 49.5%  | 50.5%  | n.a.          | 16.4% | 20.3%  | 20.3%  | 16.6% | 13.2%  | 13.2%              | 23.4%  | 47.0%       | 29.6% |
|                             |             | Bias           | 3.4%   | -4.4%  |               | 12.4% | 19.5%  | -2.5%  | -8.2% | -8.0%  | -13.2%             | -18.7% | -21.3%      | 40.0% |
|                             | Italy       | Sample (N=168) | 50.9%  | 49.1%  | 0.0%          | 12.6% | 33.5%  | 18.6%  | 19.2% | 12.6%  | 3.6%               | 20.5%  | 29.5%       | 50.0% |
|                             |             | Population     | 51.8%  | 48.2%  | n.a.          | 14.6% | 13.9%  | 18.2%  | 18.5% | 14.5%  | 20.3%              | 54.8%  | 41.1%       | 4.16% |
|                             |             | Bias           | -0.9%  | 0.9%   |               | -2.0% | 19.6%  | 0.4%   | 0.7%  | -1.9%  | -16.7%             | -34.3% | -11.6%      | 45.8% |
|                             | Netherlands | Sample (N=262) | 51.1%  | 47.7%  | 1.1%          | 21.4% | 16.8%  | 17.2%  | 15.3% | 18.7%  | 10.7%              | 15.3%  | 46.2%       | 38.5% |
|                             |             | Population     | 49.3%  | 50.7%  | n.a.          | 19.0% | 15.1%  | 16.2%  | 18.0% | 15.0%  | 16.7%              | 32%    | 39%         | 29%   |
|                             |             | Bias           | 1.8%   | -3.0%  |               | 2.4%  | 1.7%   | 1.0%   | -2.7% | 3.7%   | -6.0%              | -16.7% | 7.2%        | 9.5%  |

*(continued on next page)*



**Table A6 (continued).** Socio-demographic characteristics of the general public samples and the respective population

| Cluster                    | Country          |                | Gender |        | Age           |        |       |       |       |        | Level of education |        |        |       |
|----------------------------|------------------|----------------|--------|--------|---------------|--------|-------|-------|-------|--------|--------------------|--------|--------|-------|
|                            |                  |                | Female | Male   | Not specified | 16-29  | 30-39 | 40-49 | 50-59 | 60-69  | ≥ 70               | Low    | Medium | High  |
| 'WEIRD'<br>Global<br>North | Norway           | Sample (N=207) | 48.8%  | 50.2%  | 1.0%          | 44.2%  | 30.6% | 11.7% | 9.7%  | 3.4%   | 0.5%               | 0.5%   | 21.3%  | 78.3% |
|                            |                  | Population     | 49.9%  | 50.2%  | n.a.          | 20.1%  | 17.1% | 17.3% | 16.4% | 13.7%  | 15.4%              | 22.8%  | 40.9%  | 36.2% |
|                            |                  | Bias           | -1.1%  | 0.0%   |               | 24.1%  | 13.5% | -5.6% | -6.7% | -10.3% | -14.9%             | -22.3% | -19.6% | 42.1% |
|                            | Portugal         | Sample (N=167) | 55.1%  | 44.9%  | 0.0%          | 13.2%  | 18.6% | 24.0% | 22.8% | 14.4%  | 7.2%               | 9.0%   | 38.9%  | 52.1% |
|                            |                  | Population     | 53.3%  | 46.7%  | n.a.          | 15.3%  | 14.6% | 18.3% | 17.2% | 15.2%  | 19.4%              | 50.8%  | 27.3%  | 21.9% |
|                            |                  | Bias           | 1.8%   | -1.8%  |               | -2.1%  | 4.0%  | 5.7%  | 5.6%  | -0.8%  | -12.2%             | -41.8% | 11.6%  | 30.2% |
|                            | Spain            | Sample (N=195) | 52.3%  | 47.2%  | 0.5%          | 23.1%  | 15.9% | 26.2% | 25.1% | 7.7%   | 2.1%               | 21.5%  | 30.3%  | 48.2% |
|                            |                  | Population     | 51.5%  | 48.5%  | n.a.          | 14.9%  | 16.1% | 20.2% | 17.9% | 13.6%  | 17.3%              | 38.7%  | 22.7%  | 38.6% |
|                            |                  | Bias           | 0.8%   | -1.3%  |               | 8.2%   | -0.2% | 6.0%  | 7.2%  | -5.9%  | -15.2%             | -17.2% | 7.6%   | 9.6%  |
|                            | Switzerland      | Sample (N=96)  | 66.7%  | 30.2%  | 3.1%          | 6.3%   | 33.3% | 27.1% | 21.9% | 6.3%   | 5.2%               | 4.2%   | 32.3%  | 63.5% |
|                            |                  | Population     | 50.8%  | 49.2%  | n.a.          | 17.3%  | 17.4% | 17.0% | 18.3% | 13.4%  | 16.6%              | 15.8%  | 50.9%  | 33.4% |
|                            |                  | Bias           | 15.9%  | -19.0% |               | -11.0% | 15.9% | 10.1% | 3.6%  | -7.1%  | -11.4%             | -11.6% | -18.6% | 30.1% |
|                            | UK               | Sample (N=187) | 51.9%  | 48.1%  | 0.0%          | 22.5%  | 12.8% | 16.6% | 17.1% | 17.1%  | 13.9%              | 16.0%  | 51.3%  | 32.6% |
|                            |                  | Population     | 51.1%  | 48.9%  | n.a.          | 19.3%  | 16.9% | 16.0% | 17.2% | 13.5%  | 17.1%              | 42.6%  | 30.5%  | 26.9% |
|                            |                  | Bias           | 0.8%   | -0.8%  |               | 3.2%   | -4.1% | 0.6%  | -0.1% | 3.6%   | -3.2%              | -26.6% | 20.8%  | 5.7%  |
|                            | USA              | Sample (N=232) | 56.5%  | 43.1%  | 0.4%          | 19.4%  | 15.5% | 15.1% | 19.0% | 19.0%  | 12.1%              | 9.5%   | 53.4%  | 37.1% |
|                            |                  | Population     | 50.8%  | 49.2%  | n.a.          | 18.1%  | 17.9% | 16.5% | 17.0% | 15.6%  | 14.9%              | 5.2%   | 59.4%  | 35.5% |
|                            |                  | Bias           | 5.7%   | -6.1%  |               | 1.3%   | -2.4% | -1.4% | 2.0%  | 3.4%   | -2.8%              | 4.3%   | -6.0%  | 1.6%  |
| Full sample                | Sample (N=2,248) | 55.2%          | 43.8%  | 1.0%   | 27.5%         | 22.0%  | 19.0% | 16.4% | 9.9%  | 5.0%   | 9.3%               | 35.2%  | 55.5%  |       |

Note. n.a. = not available.

**Table A7.** Self-reported prior knowledge about SRM among students and the general public

| Cluster                  | Country     | Students |                  |            |                     |         | General public |                  |            |                     |         |                         |      |
|--------------------------|-------------|----------|------------------|------------|---------------------|---------|----------------|------------------|------------|---------------------|---------|-------------------------|------|
|                          |             | <i>N</i> | 0=Nothing at all | 1=A little | 2=A moderate amount | 3=A lot | <i>N</i>       | 0=Nothing at all | 1=A little | 2=A moderate amount | 3=A lot | 4=I am an expert on SRM |      |
| Global South             | Argentina   | 210      | 66.2%            | 22.4%      | 11.4%               | 0.0%    | 0.0%           | --               | --         | --                  | --      | --                      | --   |
|                          | Brazil      | 210      | 54.3%            | 34.3%      | 11.4%               | 0.0%    | 0.0%           | --               | --         | --                  | --      | --                      | --   |
|                          | China       | 187      | 73.8%            | 22.5%      | 3.7%                | 0.0%    | 0.0%           | --               | --         | --                  | --      | --                      | --   |
|                          | Iran        | 193      | 49.2%            | 31.6%      | 18.7%               | 0.5%    | 0.0%           | 170              | 53.5%      | 28.2%               | 17.1%   | 1.2%                    | 0.0% |
|                          | Nigeria     | 175      | 47.4%            | 28.0%      | 16.6%               | 6.3%    | 1.7%           | --               | --         | --                  | --      | --                      | --   |
| 'Non-WEIRD' Global North | Kazakhstan  | 160      | 28.8%            | 32.5%      | 34.4%               | 3.1%    | 1.3%           | 141              | 42.6%      | 34.8%               | 19.9%   | 2.8%                    | 0.0% |
|                          | Mexico      | 208      | 37.5%            | 40.4%      | 21.2%               | 1.0%    | 0.0%           | --               | --         | --                  | --      | --                      | --   |
|                          | Russia      | 217      | 66.4%            | 24.4%      | 9.2%                | 0.0%    | 0.0%           | --               | --         | --                  | --      | --                      | --   |
|                          | Taiwan      | 260      | 76.5%            | 19.6%      | 2.7%                | 0.8%    | 0.4%           | 232              | 67.7%      | 25.0%               | 6.5%    | 0.9%                    | 0.0% |
|                          | Turkey      | 410      | 81.2%            | 13.9%      | 4.4%                | 0.5%    | 0.0%           | --               | --         | --                  | --      | --                      | --   |
| 'WEIRD' Global North     | Australia   | 114      | 53.5%            | 40.4%      | 5.3%                | 0.9%    | 0.0%           | --               | --         | --                  | --      | --                      | --   |
|                          | Ireland     | 139      | 62.6%            | 29.5%      | 6.5%                | 0.7%    | 0.7%           | 191              | 69.1%      | 22.0%               | 6.3%    | 2.1%                    | 0.5% |
|                          | Italy       | 173      | 72.3%            | 20.8%      | 5.8%                | 1.2%    | 0.0%           | 168              | 70.2%      | 23.8%               | 4.8%    | 1.2%                    | 0.0% |
|                          | Netherlands | 211      | 73.9%            | 23.2%      | 1.9%                | 0.5%    | 0.5%           | 262              | 80.9%      | 17.2%               | 1.9%    | 0.0%                    | 0.0% |
|                          | Norway      | 441      | 79.6%            | 15.6%      | 4.5%                | 0.2%    | 0.0%           | 207              | 79.2%      | 17.4%               | 2.4%    | 0.0%                    | 0.0% |
|                          | Portugal    | --       | --               | --         | --                  | --      | --             | 167              | 29.3%      | 28.7%               | 33.5%   | 7.8%                    | 0.6% |
|                          | Spain       | 198      | 50.5%            | 33.3%      | 15.7%               | 0.5%    | 0.0%           | 195              | 40.5%      | 36.4%               | 21.5%   | 1.0%                    | 0.5% |
|                          | Switzerland | 222      | 53.6%            | 32.9%      | 11.7%               | 1.8%    | 0.0%           | 96               | 68.8%      | 24.0%               | 6.3%    | 1.0%                    | 0.0% |
|                          | UK          | 194      | 67.0%            | 20.6%      | 7.7%                | 4.1%    | 0.5%           | 187              | 60.4%      | 21.9%               | 9.6%    | 7.5%                    | 0.5% |
| USA                      | 661         | 62.5%    | 25.7%            | 10.6%      | 1.1%                | 0.2%    | 232            | 54.3%            | 21.6%      | 12.9%               | 9.9%    | 1.3%                    |      |
| Full samples             |             | 4,583    | 63.5%            | 25.3%      | 9.9%                | 1.1%    | 0.2%           | 2,248            | 60.8%      | 24.5%               | 11.3%   | 3.1%                    | 0.3% |

*Note.* Participants were asked “How much do you know about Solar Radiation Management (SRM)?” and could respond on a scale ranging from 0=*Nothing at all* to 4=*I am an expert*.

### Supplementary note A3: Information on sensitivity analyses

We ran sensitivity power analyses (Faul et al., 2009) with G\*Power 3.1.9.7 to specify the effect size we were able to detect with the achieved sample sizes, given a power of 0.80 and analysis-specific  $\alpha$ -levels. For tests applying the full samples (i.e. part of the ANCOVAs and generalised estimating equations [GEE]; see SI-C), an  $\alpha$ -level of .05 was applied. When comparing between country clusters, in the regression analyses per subsample, and when comparing coefficients between subsamples and the respective full sample, we applied Bonferroni corrected  $\alpha$ -levels (see SI-C). As sample sizes differed between countries, we ran the sensitivity power analyses per country and for the full samples. We report here the results for the most demanding type of analysis we applied, the omnibus  $F$ -test of the multiple regression analyses testing whether belief in global warming and the six perceptions about SRM explain acceptability per country (Bonferroni corrected  $\alpha$ -levels of .00278 for the student and .0045 for the general public samples). The smallest effect sizes we were able to detect ranged from  $f^2=.04$  to  $f^2=.23$  among the student samples and from  $f^2=.09$  to  $f^2=.26$  among the general public samples (see Table A6). That is, the achieved sample sizes allowed us to detect small to medium effects (Cohen, 1992), which is satisfactory as research found large effects in the omnibus  $F$ -test when analysing the predictors of public acceptability of SRM (Visschers et al., 2017).

**Table A8.** Overview of sample sizes and results from sensitivity power analysis

| Cluster                  | Country     | Students |                       | General public |                       |
|--------------------------|-------------|----------|-----------------------|----------------|-----------------------|
|                          |             | <i>N</i> | <i>f</i> <sup>2</sup> | <i>N</i>       | <i>f</i> <sup>2</sup> |
| Global South             | Argentina   | 210      | .12                   | --             | --                    |
|                          | Brazil      | 210      | .12                   | --             | --                    |
|                          | China       | 187      | .13                   | --             | --                    |
|                          | Iran        | 193      | .13                   | 170            | .14                   |
|                          | Nigeria     | 175      | .14                   | --             | --                    |
| 'Non-WEIRD' Global North | Kazakhstan  | 160      | .16                   | 141            | .17                   |
|                          | Mexico      | 208      | .12                   | --             | --                    |
|                          | Russia      | 217      | .11                   | --             | --                    |
|                          | Taiwan      | 260      | .09                   | 232            | .10                   |
|                          | Turkey      | 410      | .06                   | --             | --                    |
| 'WEIRD' Global North     | Australia   | 114      | .23                   | --             | --                    |
|                          | Ireland     | 139      | .18                   | 191            | .12                   |
|                          | Italy       | 173      | .15                   | 168            | .14                   |
|                          | Netherlands | 211      | .11                   | 262            | .09                   |
|                          | Norway      | 441      | .05                   | 207            | .11                   |
|                          | Portugal    | --       | --                    | 167            | .14                   |
|                          | Spain       | 198      | .13                   | 195            | .12                   |
|                          | Switzerland | 222      | .11                   | 96             | .26                   |
|                          | UK          | 194      | .13                   | 187            | .13                   |
|                          | USA         | 661      | .04                   | 232            | .10                   |
| Full samples             |             | 4,583    | <.01                  | 2,248          | .01                   |

*Note.* *f*<sup>2</sup>= Effect size of the squared multiple correlations (*R*<sup>2</sup>) tested in the omnibus *F*-test of a multiple regression analysis (Cohen, 1992; Faul et al., 2009).

## Reference list of Supplementary information A

- Cohen, J. (1992). A power primer. *Psychological Bulletin*, 112(1), 155–159. <https://doi.org/10.1037//0033-2909.112.1.155>
- Faul, F., Erdfelder, E., Buchner, A., & Lang, A.-G. (2009). Statistical power analyses using G\*Power 3.1: Tests for correlation and regression analyses. *Behavior Research Methods*, 41(4), 1149–1160. <https://doi.org/10.3758/BRM.41.4.1149>
- Fonseca, I. (2023, September 15). Mexico eyes return to G77+China Group. *The Rio Times*. <https://www.riotimesonline.com/mexico-eyes-return-to-g77china-group/>
- Henrich, J., Heine, S. J., & Norenzayan, A. (2010). Most people are not WEIRD. *Nature*, 466(7302), 29–29. <https://doi.org/10.1038/466029a>
- IPCC. (2022). *Climate Change 2022: Impacts, Adaptation and Vulnerability*. Intergovernmental Panel on Climate Change.
- Solarz, M. W. (2019). *The Global North-South Atlas: Mapping Global Change* (1st ed.). Routledge. <https://doi.org/10.4324/9780429492037>
- The Group of 77. (1964). *Joint declaration of the seventy-seven developing countries made at the conclusion of the United Nations Conference on Trade and Development*. United Nations. Retrieved February 2 2024 from <https://www.g77.org/doc/Joint%20Declaration.html>
- The Group of 77. (n.a.). *The members states of the group of 77*. United Nations. Retrieved February 2 2024 from <https://www.g77.org/doc/members.html>
- Vischers, V. H. M., Shi, J., Siegrist, M., & Arvai, J. (2017). Beliefs and values explain international differences in perception of solar radiation management: Insights from a cross-country survey. *Climatic Change*, 142(3–4), 531–544. <https://doi.org/10.1007/s10584-017-1970-8>
