# Supplementary material for: Public opinion about solar radiation management: A cross-cultural study in 20 countries around the world
Source: Springer Nature journal article supplement (doi:10.1007/s10584-024-03708-3), 2024-03-29
Supplement: MOESM4 [file 10584_2024_3708_MOESM4_ESM.pdf]

## **Supplementary information D of the paper Public opinion about solar radiation management: A cross-cultural study in 20 countries around the world**

### **Detailed results of the analyses of covariance and supplementary figures presenting the distributions of the variables**

#### **Content of Supplementary information D:**

- Table D1a. Mean scores for belief in global warming, different perceptions about SRM and acceptability of SRM among students
- Table D1b. Mean scores for belief in global warming, different perceptions about SRM and acceptability of SRM among the general public
- Table D2a. Overall mean scores for belief in global warming, different perceptions about SRM and acceptability of SRM among students in the Global South, the ‘non-WEIRD’ Global North, and the ‘WEIRD’ Global North
- Table D2b. Overall mean scores for belief in global warming, different perceptions about SRM and acceptability of SRM among the general public in the Global South, the ‘non-WEIRD’ Global North, and the ‘WEIRD’ Global North
- Fig. D1a. Distributions in belief in global warming, perceptions about SRM and acceptability of SRM in the full student sample ( $N=4,583$ ).
- Fig. D1b. Distributions in belief in global warming, perceptions about SRM and acceptability of SRM in the full general public sample ( $N=2,248$ )
- Fig. D2a. Distributions in the perception that SRM addresses the causes of global warming among students in each country
- Fig. D2b. Distributions in the perception that SRM addresses the causes of global warming among the general public in each country

**Table D1a.** Mean scores for belief in global warming, different perceptions about SRM and acceptability of SRM among students

| Sample                               | N/n   | Belief in global warming |                         | SRM limits global warming |                         |                        | SRM addresses causes of global warming |                          |                         | SRM increases mitigation efforts |                          |                         | SRM is positive for humans and nature |                          |                         | SRM is inexpensive |                          |                         | SRM affects countries equally |                          |                         | SRM is acceptable |                          |                         |      |          |    |  |  |          |
|--------------------------------------|-------|--------------------------|-------------------------|---------------------------|-------------------------|------------------------|----------------------------------------|--------------------------|-------------------------|----------------------------------|--------------------------|-------------------------|---------------------------------------|--------------------------|-------------------------|--------------------|--------------------------|-------------------------|-------------------------------|--------------------------|-------------------------|-------------------|--------------------------|-------------------------|------|----------|----|--|--|----------|
|                                      |       | M <sup>2</sup>           | 99.737% CI <sup>1</sup> |                           | M <sup>2</sup>          | 9.737% CI <sup>1</sup> |                                        | M <sup>2</sup>           | 99.737% CI <sup>1</sup> |                                  | M <sup>2</sup>           | 99.737% CI <sup>1</sup> |                                       | M <sup>2</sup>           | 99.737% CI <sup>1</sup> |                    | M <sup>2</sup>           | 99.737% CI <sup>1</sup> |                               | M <sup>2</sup>           | 99.737% CI <sup>1</sup> |                   | M <sup>2</sup>           | 99.737% CI <sup>1</sup> |      |          |    |  |  |          |
|                                      |       |                          | LL                      | UL                        |                         | LL                     | UL                                     |                          | LL                      | UL                               |                          | LL                      | UL                                    |                          | LL                      | UL                 |                          | LL                      | UL                            |                          | LL                      | UL                |                          | LL                      | UL   | LL       | UL |  |  |          |
| Overall                              | 4,583 | 2.05                     | 2.01                    | 2.10                      | 0.75                    | 0.67                   | 0.82                                   | -0.25                    | -0.33                   | -0.16                            | -0.81                    | -0.88                   | -0.74                                 | -0.12                    | -0.18                   | -0.06              | -0.83                    | -0.91                   | -0.75                         | -1.13                    | -1.20                   | -1.06             | 0.64                     | 0.58                    | 0.71 |          |    |  |  |          |
| Argentina                            | 210   | 2.49 <sup>h,i</sup>      | 2.37                    | 2.60                      | 0.92 <sup>d</sup>       | 0.59                   | 1.20                                   | 0.11 <sup>f,i</sup>      | -0.27                   | 0.54                             | -0.67 <sup>d-g</sup>     | -1.00                   | -0.32                                 | 0.05 <sup>e-h</sup>      | -0.23                   | 0.35               | -0.93 <sup>a-f</sup>     | -1.29                   | -0.60                         | -1.56 <sup>a,b</sup>     | -1.84                   | -1.24             | 1.08 <sup>g,h</sup>      | 0.80                    | 1.34 |          |    |  |  |          |
| Brazil                               | 210   | 2.15 <sup>d-f</sup>      | 1.95                    | 2.33                      | 0.63 <sup>b-d</sup>     | 0.27                   | 0.97                                   | -0.68 <sup>b,c,e</sup>   | -1.12                   | -0.24                            | -1.18 <sup>b,c</sup>     | -1.49                   | -0.81                                 | -0.02 <sup>d-h</sup>     | -0.31                   | 0.28               | -0.78 <sup>b-g</sup>     | -1.13                   | -0.41                         | -1.46 <sup>a-c</sup>     | -1.75                   | -1.14             | 0.82 <sup>e-h</sup>      | 0.51                    | 1.11 |          |    |  |  |          |
| China                                | 187   | 1.64 <sup>c</sup>        | 1.44                    | 1.82                      | 0.92 <sup>d</sup>       | 0.67                   | 1.17                                   | -0.53 <sup>c,e</sup>     | -0.90                   | -0.18                            | -0.30 <sup>g</sup>       | -0.64                   | 0.06                                  | 0.16 <sup>g,h</sup>      | -0.08                   | 0.41               | -1.16 <sup>a,b</sup>     | -1.47                   | -0.84                         | -0.72 <sup>f-h</sup>     | -1.04                   | -0.40             | 0.69 <sup>c-f</sup>      | 0.42                    | 0.95 |          |    |  |  |          |
| Iran <sup>3</sup>                    | 193   | 1.65 <sup>c</sup>        | 1.44                    | 1.84                      | 0.93 <sup>d</sup>       | 0.61                   | 1.24                                   | <b>1.90<sup>j</sup></b>  | 1.61                    | 2.16                             | -0.62 <sup>d-g</sup>     | -0.95                   | -0.26                                 | -0.18 <sup>c-g</sup>     | -0.44                   | 0.11               | -0.95 <sup>a-d</sup>     | -1.24                   | -0.64                         | -1.11 <sup>c-f</sup>     | -1.44                   | -0.78             | 0.75 <sup>d-g</sup>      | 0.47                    | 0.99 |          |    |  |  |          |
| Nigeria                              | 175   | <b>1.18<sup>a</sup></b>  | 0.87                    | 1.46                      | 0.34 <sup>a-c</sup>     | -0.03                  | 0.74                                   | -0.22 <sup>e-g</sup>     | -0.67                   | 0.19                             | -0.27 <sup>g</sup>       | -0.63                   | 0.08                                  | 0.00 <sup>d-h</sup>      | -0.28                   | 0.28               | -1.11 <sup>a-c</sup>     | -1.50                   | -0.68                         | -0.53 <sup>g,h</sup>     | -0.88                   | -0.17             | 0.54 <sup>c-c</sup>      | 0.20                    | 0.84 |          |    |  |  |          |
| Kazakhstan <sup>3</sup>              | 160   | 1.25 <sup>a,b</sup>      | 0.96                    | 1.54                      | <b>0.05<sup>a</sup></b> | -0.37                  | 0.48                                   | 0.25 <sup>f,i</sup>      | -0.17                   | 0.70                             | -0.53 <sup>c-g</sup>     | -0.90                   | -0.15                                 | -0.64 <sup>a,b</sup>     | -0.94                   | -0.30              | -0.95 <sup>a-f</sup>     | -1.33                   | -0.53                         | -0.58 <sup>g,h</sup>     | -1.00                   | -0.17             | 0.03 <sup>a,b</sup>      | -0.29                   | 0.34 |          |    |  |  |          |
| Mexico                               | 208   | 2.26 <sup>d-g</sup>      | 2.07                    | 2.44                      | 0.75 <sup>c,d</sup>     | 0.46                   | 1.04                                   | 0.52 <sup>i</sup>        | 0.18                    | 0.86                             | <b>-0.21<sup>g</sup></b> | -0.60                   | 0.18                                  | <b>0.37<sup>h</sup></b>  | 0.07                    | 0.66               | <b>-1.30<sup>a</sup></b> | -1.60                   | -1.00                         | <b>-0.33<sup>h</sup></b> | -0.73                   | 0.04              | <b>1.12<sup>h</sup></b>  | 0.84                    | 1.40 |          |    |  |  |          |
| Russia                               | 217   | 1.60 <sup>b,c</sup>      | 1.38                    | 1.82                      | 0.62 <sup>b-d</sup>     | 0.26                   | 0.97                                   | -0.32 <sup>d-f</sup>     | -0.77                   | 0.08                             | -0.88 <sup>c-e</sup>     | -1.17                   | -0.61                                 | -0.45 <sup>a-c</sup>     | -0.69                   | -0.19              | -0.63 <sup>c-g</sup>     | -1.00                   | -0.27                         | -1.54 <sup>a-c</sup>     | -1.82                   | -1.24             | 0.39 <sup>b-d</sup>      | 0.13                    | 0.65 |          |    |  |  |          |
| Taiwan <sup>3</sup>                  | 260   | 2.03 <sup>d</sup>        | 1.86                    | 2.18                      | 0.82 <sup>d</sup>       | 0.58                   | 1.05                                   | -0.91 <sup>b,c</sup>     | -1.24                   | -0.59                            | -0.65 <sup>d-g</sup>     | -0.89                   | -0.40                                 | -0.31 <sup>b-d</sup>     | -0.51                   | -0.12              | -0.88 <sup>b-c</sup>     | -1.15                   | -0.61                         | -1.21 <sup>b-c</sup>     | -1.46                   | -0.96             | 0.52 <sup>c-c</sup>      | 0.31                    | 0.71 |          |    |  |  |          |
| Turkey                               | 410   | 2.32 <sup>f,g</sup>      | 2.22                    | 2.42                      | 0.84 <sup>d</sup>       | 0.63                   | 1.04                                   | 0.25 <sup>g-i</sup>      | 0.00                    | 0.50                             | -0.94 <sup>c-e</sup>     | -1.15                   | -0.74                                 | -0.19 <sup>c-f</sup>     | -0.39                   | 0.01               | -0.70 <sup>c-g</sup>     | -0.92                   | -0.47                         | -1.62 <sup>a</sup>       | -1.83                   | -1.42             | 0.55 <sup>c-e</sup>      | 0.34                    | 0.74 |          |    |  |  |          |
| Australia                            | 114   | 2.37 <sup>f-i</sup>      | 2.18                    | 2.54                      | <b>1.08<sup>d</sup></b> | 0.67                   | 1.44                                   | -0.25 <sup>c-h</sup>     | -0.75                   | 0.26                             | -0.75 <sup>c-g</sup>     | -1.18                   | -0.30                                 | 0.01 <sup>d-h</sup>      | -0.33                   | 0.37               | -0.80 <sup>a-g</sup>     | -1.30                   | -0.30                         | -0.78 <sup>e-h</sup>     | -1.18                   | -0.37             | 0.86 <sup>c-h</sup>      | 0.47                    | 1.24 |          |    |  |  |          |
| Ireland <sup>3</sup>                 | 139   | 2.34 <sup>e-i</sup>      | 2.12                    | 2.55                      | 0.89 <sup>d</sup>       | 0.53                   | 1.21                                   | -0.78 <sup>b,c,e</sup>   | -1.26                   | -0.34                            | -1.18 <sup>b,c</sup>     | -1.52                   | -0.82                                 | -0.20 <sup>b-g</sup>     | -0.51                   | 0.10               | -0.82 <sup>a-g</sup>     | -1.33                   | -0.36                         | -1.46 <sup>a-d</sup>     | -1.80                   | -1.10             | 0.90 <sup>e-h</sup>      | 0.48                    | 1.25 |          |    |  |  |          |
| Italy <sup>3</sup>                   | 173   | 2.10 <sup>d-f</sup>      | 1.86                    | 2.31                      | 0.20 <sup>a,b</sup>     | -0.22                  | 0.64                                   | -0.21 <sup>e-h</sup>     | -0.63                   | 0.20                             | -1.04 <sup>b-d</sup>     | -1.37                   | -0.71                                 | -0.03 <sup>d-h</sup>     | -0.33                   | 0.30               | -0.51 <sup>d-g</sup>     | -0.88                   | -0.13                         | -1.39 <sup>a-d</sup>     | -1.74                   | -1.04             | 0.26 <sup>a-c</sup>      | -0.10                   | 0.61 |          |    |  |  |          |
| Netherlands <sup>3</sup>             | 211   | 2.25 <sup>d-g</sup>      | 2.05                    | 2.43                      | 1.00 <sup>d</sup>       | 0.69                   | 1.29                                   | -0.88 <sup>b-d</sup>     | -1.26                   | -0.50                            | -1.38 <sup>b</sup>       | -1.67                   | -1.10                                 | -0.27 <sup>b,c,e</sup>   | -0.48                   | -0.06              | -0.46 <sup>e-g</sup>     | -0.80                   | -0.11                         | -1.57 <sup>a,b</sup>     | -1.82                   | -1.31             | 0.67 <sup>c-f</sup>      | 0.39                    | 0.94 |          |    |  |  |          |
| Norway <sup>3</sup>                  | 441   | 2.37 <sup>g,h</sup>      | 2.27                    | 2.47                      | 0.88 <sup>d</sup>       | 0.63                   | 1.09                                   | -1.06 <sup>b</sup>       | -1.32                   | -0.83                            | -1.29 <sup>b</sup>       | -1.51                   | -1.06                                 | -0.16 <sup>c-f</sup>     | -0.33                   | -0.01              | <b>-0.45<sup>g</sup></b> | -0.71                   | -0.19                         | -1.63 <sup>a</sup>       | -1.82                   | -1.44             | 0.60 <sup>c-e</sup>      | 0.41                    | 0.78 |          |    |  |  |          |
| Spain <sup>3</sup>                   | 198   | <b>2.56<sup>j</sup></b>  | 2.43                    | 2.68                      | 0.77 <sup>c,d</sup>     | 0.47                   | 1.07                                   | 0.35 <sup>h,i</sup>      | -0.03                   | 0.74                             | -0.33 <sup>g</sup>       | -0.69                   | 0.02                                  | 0.17 <sup>f-h</sup>      | -0.14                   | 0.45               | -1.01 <sup>a-c</sup>     | -1.35                   | -0.69                         | -0.98 <sup>d-g</sup>     | -1.33                   | -0.61             | 0.85 <sup>e-h</sup>      | 0.53                    | 1.17 |          |    |  |  |          |
| Switzerland <sup>3</sup>             | 222   | 2.20 <sup>d-g</sup>      | 2.03                    | 2.35                      | 0.85 <sup>d</sup>       | 0.58                   | 1.11                                   | <b>-1.69<sup>a</sup></b> | -2.01                   | -1.38                            | <b>-1.85<sup>a</sup></b> | -2.08                   | -1.59                                 | <b>-0.67<sup>a</sup></b> | -0.87                   | -0.46              | -0.47 <sup>f,g</sup>     | -0.80                   | -0.16                         | <b>-1.69<sup>a</sup></b> | -1.92                   | -1.44             | <b>-0.14<sup>a</sup></b> | -0.40                   | 0.11 |          |    |  |  |          |
| UK <sup>3</sup>                      | 194   | 2.14 <sup>d-f</sup>      | 1.93                    | 2.32                      | 0.82 <sup>d</sup>       | 0.55                   | 1.10                                   | -0.52 <sup>c,e</sup>     | -0.88                   | -0.16                            | -0.85 <sup>c-f</sup>     | -1.17                   | -0.54                                 | 0.07 <sup>f-h</sup>      | -0.18                   | 0.32               | -1.03 <sup>a-d</sup>     | -1.38                   | -0.65                         | -0.74 <sup>f-h</sup>     | -1.04                   | -0.44             | 0.94 <sup>f-h</sup>      | 0.67                    | 1.21 |          |    |  |  |          |
| USA <sup>3</sup>                     | 661   | 2.11 <sup>d,e</sup>      | 1.94                    | 2.28                      | 0.93 <sup>d</sup>       | 0.69                   | 1.18                                   | -0.01 <sup>f-h</sup>     | -0.31                   | 0.31                             | -0.45 <sup>f,g</sup>     | -0.71                   | -0.18                                 | -0.01 <sup>d,f,g</sup>   | -0.21                   | 0.21               | -0.78 <sup>b-g</sup>     | -1.06                   | -0.51                         | -0.65 <sup>g,h</sup>     | -0.91                   | -0.40             | 0.79 <sup>e-h</sup>      | 0.57                    | 1.03 |          |    |  |  |          |
| <i>F</i> <sub>Country(18,4563)</sub> |       | 41.50***                 |                         |                           |                         | 6.376***               |                                        |                          |                         | 44.55***                         |                          |                         |                                       | 20.23***                 |                         |                    |                          | 10.33***                |                               |                          |                         | 5.45***           |                          |                         |      | 24.13*** |    |  |  | 13.27*** |
| <i>f</i> <sub>Country</sub>          |       | .41                      |                         |                           |                         | .16                    |                                        |                          |                         | .42                              |                          |                         |                                       | .28                      |                         |                    |                          | .20                     |                               |                          |                         | .14               |                          |                         |      | .31      |    |  |  | .23      |
| <i>F</i> <sub>Time(1,4563)</sub>     |       | 11.85**                  |                         |                           |                         | 4.365*                 |                                        |                          |                         | 0.21                             |                          |                         |                                       | 0.03                     |                         |                    |                          | 0.53                    |                               |                          |                         | 0.57              |                          |                         |      | 0.40     |    |  |  | 0.54     |
| <i>f</i> <sub>Time</sub>             |       | .05                      |                         |                           |                         | .03                    |                                        |                          |                         | .01                              |                          |                         |                                       | .003                     |                         |                    |                          | .01                     |                               |                          |                         | .01               |                          |                         |      | .01      |    |  |  | .01      |

Note. Belief in global warming and all perceptions about and acceptability of SRM were measured with bipolar response scales ranging from -3, representing the negative pole, to +3, representing the positive pole, with 0 being "neither nor". CI=Confidence interval. LL=Lower level. UL=Upper level. Coloured cells indicate mean scores that are, according to their CI, significantly larger (cells in dark blue) or smaller (cells in light blue) than the mid-point of the scale. Within a column, country means with different superscripts are significantly different from each other at the Bonferroni corrected BCa bootstrap  $p \leq .00278$ . Country means in bold are the highest respectively lowest mean scores per column. <sup>1</sup> CIs are Bonferroni corrected and BCa bootstrapped. <sup>2</sup> All mean scores are controlled for time of data collection (spring versus autumn). <sup>3</sup> Data were also collected among the general public. \*  $p \leq .05$ . \*\*  $p \leq .01$ . \*\*\*  $p \leq .001$ .

**Table D1b.** Mean scores for belief in global warming, different perceptions about SRM and acceptability of SRM among the general public

| Sample                                | N/n                | Belief in global warming |                         | SRM limits global warming |                     |                         | SRM addresses causes of global warming |                      |                         | SRM increases mitigation efforts |                      |                         | SRM is positive for humans and nature |                      |                         | SRM is inexpensive |                      |                         | SRM affects countries equally |                      |                         | SRM is acceptable |                      |                         |      |    |
|---------------------------------------|--------------------|--------------------------|-------------------------|---------------------------|---------------------|-------------------------|----------------------------------------|----------------------|-------------------------|----------------------------------|----------------------|-------------------------|---------------------------------------|----------------------|-------------------------|--------------------|----------------------|-------------------------|-------------------------------|----------------------|-------------------------|-------------------|----------------------|-------------------------|------|----|
|                                       |                    | M <sup>2</sup>           | 99.583% CI <sup>1</sup> |                           | M <sup>2</sup>      | 99.583% CI <sup>1</sup> |                                        | M <sup>2</sup>       | 99.583% CI <sup>1</sup> |                                  | M <sup>2</sup>       | 99.583% CI <sup>1</sup> |                                       | M <sup>2</sup>       | 99.583% CI <sup>1</sup> |                    | M <sup>2</sup>       | 99.583% CI <sup>1</sup> |                               | M <sup>2</sup>       | 99.583% CI <sup>1</sup> |                   | M <sup>2</sup>       | 99.583% CI <sup>1</sup> |      |    |
|                                       |                    |                          | LL                      | UL                        |                     | LL                      | UL                                     |                      | LL                      | UL                               |                      | LL                      | UL                                    |                      | LL                      | UL                 |                      | LL                      | UL                            |                      | LL                      | UL                |                      | LL                      | UL   | LL |
| Overall                               | 2,245 <sup>3</sup> | 1.89                     | 1.83                    | 1.96                      | 0.45                | 0.35                    | 0.55                                   | -0.43                | -0.54                   | -0.33                            | -0.79                | -0.87                   | -0.69                                 | -0.30                | -0.38                   | -0.21              | -0.86                | -0.96                   | -0.75                         | -1.10                | -1.20                   | -1.00             | 0.26                 | 0.16                    | 0.35 |    |
| Iran                                  | 170                | 1.53 <sup>a,b</sup>      | 1.29                    | 1.76                      | 1.02 <sup>d</sup>   | 0.69                    | 1.34                                   | 1.86 <sup>f</sup>    | 1.56                    | 2.13                             | -0.49 <sup>d,e</sup> | -0.85                   | -0.13                                 | 0.05 <sup>d</sup>    | -0.24                   | 0.33               | -0.92 <sup>b,c</sup> | -1.24                   | -0.60                         | -1.08 <sup>b,e</sup> | -1.43                   | -0.71             | 0.83 <sup>e</sup>    | 0.52                    | 1.12 |    |
| Kazakhstan                            | 141                | 1.51 <sup>a,b</sup>      | 1.28                    | 1.73                      | -0.20 <sup>a</sup>  | -0.67                   | 0.25                                   | 0.09 <sup>e</sup>    | -0.32                   | 0.55                             | -0.60 <sup>d,e</sup> | -0.94                   | -0.25                                 | -0.66 <sup>a,b</sup> | -1.01                   | -0.33              | -1.47 <sup>a</sup>   | -1.84                   | -1.08                         | -0.81 <sup>d,e</sup> | -1.18                   | -0.39             | -0.22 <sup>a</sup>   | -0.56                   | 0.13 |    |
| Taiwan                                | 231                | 2.27 <sup>e</sup>        | 2.13                    | 2.39                      | 0.64 <sup>c,d</sup> | 0.37                    | 0.89                                   | -0.59 <sup>c,d</sup> | -0.94                   | -0.23                            | -0.27 <sup>e</sup>   | -0.54                   | 0.01                                  | -0.04 <sup>c,d</sup> | -0.32                   | 0.22               | -0.79 <sup>b,c</sup> | -1.06                   | -0.52                         | -0.98 <sup>c,e</sup> | -1.28                   | -0.67             | 0.47 <sup>c-e</sup>  | 0.21                    | 0.72 |    |
| Ireland                               | 191                | 2.13 <sup>d,e</sup>      | 1.90                    | 2.32                      | 0.61 <sup>c,d</sup> | 0.28                    | 0.93                                   | -1.20 <sup>a,b</sup> | -1.55                   | -0.84                            | -1.11 <sup>b,c</sup> | -1.38                   | -0.82                                 | -0.40 <sup>a-c</sup> | -0.68                   | -0.11              | -0.81 <sup>b,c</sup> | -1.19                   | -0.45                         | -1.48 <sup>a,b</sup> | -1.76                   | -1.18             | 0.34 <sup>b-d</sup>  | 0.02                    | 0.65 |    |
| Italy                                 | 166                | 1.96 <sup>c,d</sup>      | 1.70                    | 2.21                      | 0.05 <sup>a,b</sup> | -0.33                   | 0.44                                   | -0.26 <sup>d,e</sup> | -0.67                   | 0.17                             | -0.74 <sup>c,d</sup> | -1.09                   | -0.37                                 | -0.17 <sup>c,d</sup> | -0.48                   | 0.13               | -0.58 <sup>c</sup>   | -0.94                   | -0.21                         | -1.24 <sup>b-d</sup> | -1.60                   | -0.88             | 0.06 <sup>a-c</sup>  | -0.28                   | 0.40 |    |
| Netherlands                           | 262                | 1.62 <sup>a,b</sup>      | 1.43                    | 1.81                      | 0.35 <sup>b,c</sup> | 0.06                    | 0.65                                   | -1.00 <sup>b,c</sup> | -1.30                   | -0.72                            | -1.24 <sup>a,b</sup> | -1.49                   | -0.98                                 | -0.73 <sup>a</sup>   | -0.96                   | -0.50              | -1.12 <sup>a,b</sup> | -1.39                   | -0.85                         | -1.28 <sup>b,c</sup> | -1.51                   | -1.03             | -0.03 <sup>a,b</sup> | -0.30                   | 0.24 |    |
| Norway                                | 207                | 2.19 <sup>d,e</sup>      | 1.96                    | 2.39                      | 0.52 <sup>b,c</sup> | 0.19                    | 0.85                                   | -1.32 <sup>a,b</sup> | -1.64                   | -0.98                            | -1.52 <sup>a</sup>   | -1.75                   | -1.25                                 | -0.32 <sup>b-d</sup> | -0.55                   | -0.09              | -0.47 <sup>b,c</sup> | -0.79                   | -0.13                         | -1.66 <sup>a</sup>   | -1.91                   | -1.40             | 0.27 <sup>b-d</sup>  | -0.01                   | 0.56 |    |
| Portugal <sup>4</sup>                 | 167                | 2.10 <sup>d,e</sup>      | 1.91                    | 2.26                      | 0.63 <sup>c,d</sup> | 0.31                    | 0.93                                   | -0.43 <sup>d,e</sup> | -0.83                   | -0.02                            | -0.44 <sup>d,e</sup> | -0.81                   | -0.09                                 | -0.01 <sup>c,d</sup> | -0.31                   | 0.30               | -0.82 <sup>c</sup>   | -1.17                   | -0.46                         | -0.93 <sup>c-e</sup> | -1.27                   | -0.57             | 0.63 <sup>d,e</sup>  | 0.30                    | 0.93 |    |
| Spain                                 | 195                | 2.50 <sup>f</sup>        | 2.35                    | 2.64                      | 0.71 <sup>c,d</sup> | 0.37                    | 1.02                                   | 0.06 <sup>e</sup>    | -0.31                   | 0.44                             | -0.67 <sup>c-e</sup> | -1.00                   | -0.31                                 | -0.03 <sup>c,d</sup> | -0.34                   | 0.29               | -0.77 <sup>b,c</sup> | -1.08                   | -0.43                         | -1.05 <sup>b-e</sup> | -1.44                   | -0.68             | 0.63 <sup>d,c</sup>  | 0.29                    | 0.96 |    |
| Switzerland                           | 96                 | 1.83 <sup>b-d</sup>      | 1.48                    | 2.15                      | 0.32 <sup>a-c</sup> | -0.13                   | 0.76                                   | -1.65 <sup>a</sup>   | -2.10                   | -1.19                            | -1.55 <sup>a,b</sup> | -1.97                   | -1.16                                 | -0.78 <sup>a</sup>   | -1.17                   | -0.39              | -0.71 <sup>b,c</sup> | -1.16                   | -0.25                         | -1.48 <sup>a,b</sup> | -1.87                   | -1.07             | -0.40 <sup>a</sup>   | -0.88                   | 0.12 |    |
| UK                                    | 187                | 1.75 <sup>b,c</sup>      | 1.50                    | 1.98                      | 0.39 <sup>b,c</sup> | 0.04                    | 0.73                                   | -0.40 <sup>d,e</sup> | -0.77                   | -0.03                            | -0.36 <sup>d,e</sup> | -0.68                   | -0.04                                 | -0.18 <sup>c,d</sup> | -0.47                   | 0.10               | -0.96 <sup>a-c</sup> | -1.34                   | -0.60                         | -0.58 <sup>c</sup>   | -0.93                   | -0.22             | 0.41 <sup>c-e</sup>  | 0.10                    | 0.73 |    |
| USA                                   | 232                | 1.33 <sup>a</sup>        | 1.05                    | 1.60                      | 0.36 <sup>b,c</sup> | 0.05                    | 0.68                                   | -0.33 <sup>d,e</sup> | -0.67                   | 0.01                             | -0.43 <sup>d,e</sup> | -0.73                   | -0.14                                 | -0.28 <sup>b-d</sup> | -0.59                   | 0.03               | -0.87 <sup>b,c</sup> | -1.23                   | -0.51                         | -0.66 <sup>e</sup>   | -0.99                   | -0.33             | 0.10 <sup>a-c</sup>  | -0.21                   | 0.42 |    |
| <i>F</i> <sub>Country(11,2231)</sub>  |                    | 23.09***                 |                         |                           | 6.85***             |                         |                                        | 42.61***             |                         |                                  |                      | 16.19***                |                                       |                      | 8.03***                 |                    |                      | 4.19***                 |                               |                      | 8.71***                 |                   |                      | 9.37***                 |      |    |
| <i>f</i> <sub>Country</sub>           |                    | .33                      |                         |                           | .18                 |                         |                                        | .45                  |                         |                                  |                      | .28                     |                                       |                      | .19                     |                    |                      | .14                     |                               |                      | .21                     |                   |                      | .21                     |      |    |
| <i>F</i> <sub>Education(1,2231)</sub> |                    | 37.73***                 |                         |                           | 3.10                |                         |                                        | 26.88***             |                         |                                  |                      | 36.28***                |                                       |                      | 7.09**                  |                    |                      | <0.01                   |                               |                      | 24.06***                |                   |                      | 0.93                    |      |    |
| <i>f</i> <sub>Education</sub>         |                    | .13                      |                         |                           | .03                 |                         |                                        | .10                  |                         |                                  |                      | .13                     |                                       |                      | .05                     |                    |                      | <.01                    |                               |                      | .10                     |                   |                      | .02                     |      |    |
| <i>F</i> <sub>Time(1,2231)</sub>      |                    | 4.13*                    |                         |                           | 0.38                |                         |                                        | 1.16                 |                         |                                  |                      | 0.02                    |                                       |                      | 1.10                    |                    |                      | 0.16                    |                               |                      | <0.01                   |                   |                      | 0.83                    |      |    |
| <i>f</i> <sub>Time</sub>              |                    | .04                      |                         |                           | .01                 |                         |                                        | .03                  |                         |                                  |                      | .003                    |                                       |                      | .02                     |                    |                      | .01                     |                               |                      | <.01                    |                   |                      | .02                     |      |    |

Note. Belief in global warming and all perceptions about and acceptability of SRM were measured with bipolar response scales ranging from -3, representing the negative pole, to +3, representing the positive pole, with 0 being "neither nor". CI=Confidence interval. LL=Lower level. UL=Upper level. Coloured cells indicate mean scores that are, according to their CI, significantly larger (cells in dark blue) or smaller (cells in light blue) than the mid-point of the scale. Within a column, country means with different superscripts are significantly different from each other at the Bonferroni corrected BCa bootstrap  $p \leq .0045$ . Country means in bold are the highest respectively lowest mean score per column. <sup>1</sup> CIs are Bonferroni corrected and BCa bootstrapped. <sup>2</sup> All mean scores are controlled for education level and time of data collection (spring versus autumn). <sup>3</sup> As  $n=3$  participants did not report on their education level and had thus to be excluded from the mean comparisons, the total sample is  $N=2,245$ . <sup>4</sup> Data were only collected among the general public. \*  $p \leq .05$ . \*\*  $p \leq .01$ . \*\*\*  $p \leq .001$ .

**Table D2a.** Overall mean scores for belief in global warming, different perceptions about SRM and acceptability of SRM among students in the Global South, the ‘non-WEIRD’ Global North, and the ‘WEIRD’ Global North

| Sample                   | N     | Belief in global warming |                         |      | SRM limits global warming |                         |      | SRM addresses causes of global warming |                         |       | SRM increases mitigation efforts |                         |       | SRM is positive for humans and nature |                         |       | SRM is inexpensive   |                         |       | SRM affects countries equally |                         |       | SRM is acceptable   |                         |      |
|--------------------------|-------|--------------------------|-------------------------|------|---------------------------|-------------------------|------|----------------------------------------|-------------------------|-------|----------------------------------|-------------------------|-------|---------------------------------------|-------------------------|-------|----------------------|-------------------------|-------|-------------------------------|-------------------------|-------|---------------------|-------------------------|------|
|                          |       | M <sup>2</sup>           | 96.667% CI <sup>1</sup> |      | M <sup>2</sup>            | 96.667% CI <sup>1</sup> |      | M <sup>2</sup>                         | 96.667% CI <sup>1</sup> |       | M <sup>2</sup>                   | 96.667% CI <sup>1</sup> |       | M <sup>2</sup>                        | 96.667% CI <sup>1</sup> |       | M <sup>2</sup>       | 96.667% CI <sup>1</sup> |       | M <sup>2</sup>                | 96.667% CI <sup>1</sup> |       | M <sup>2</sup>      | 96.667% CI <sup>1</sup> |      |
|                          |       |                          | LL                      | UL   |                           | LL                      | UL   |                                        | LL                      | UL    |                                  | LL                      | UL    |                                       | LL                      | UL    |                      | LL                      | UL    |                               | LL                      | UL    |                     | LL                      | UL   |
| Global South             | 975   | 1.85 <sup>b</sup>        | 1.79                    | 1.92 | 0.78 <sup>a</sup>         | 0.68                    | 0.87 | 0.11 <sup>a</sup>                      | -0.01                   | 0.22  | -0.60 <sup>a</sup>               | -0.72                   | -0.50 | 0.01 <sup>a</sup>                     | -0.07                   | 0.10  | -0.97 <sup>b</sup>   | -1.08                   | -0.86 | -1.08 <sup>a</sup>            | -1.18                   | -0.98 | 0.79 <sup>a</sup>   | 0.70                    | 0.88 |
| ‘Non-WEIRD’ Global North | 1,255 | 1.92 <sup>b</sup>        | 1.85                    | 1.97 | 0.64 <sup>a</sup>         | 0.54                    | 0.74 | -0.04 <sup>a</sup>                     | -0.16                   | 0.08  | -0.64 <sup>a</sup>               | -0.73                   | -0.54 | -0.24 <sup>b</sup>                    | -0.31                   | -0.16 | -0.88 <sup>a,b</sup> | -0.98                   | -0.79 | -1.06 <sup>a</sup>            | -1.16                   | -0.97 | 0.53 <sup>b</sup>   | 0.46                    | 0.61 |
| ‘WEIRD’ Global North     | 2,353 | 2.24 <sup>a</sup>        | 2.20                    | 2.28 | 0.80 <sup>a</sup>         | 0.73                    | 0.87 | -0.54 <sup>b</sup>                     | -0.63                   | -0.45 | -1.01 <sup>b</sup>               | -1.08                   | -0.93 | -0.12 <sup>a,b</sup>                  | -0.18                   | -0.06 | -0.72 <sup>a</sup>   | -0.80                   | -0.64 | -1.20 <sup>a</sup>            | -1.27                   | -1.13 | 0.63 <sup>a,b</sup> | 0.56                    | 0.70 |

Note. Belief in global warming and all perceptions about and acceptability of SRM were measured with bipolar response scales ranging from -3, representing the negative pole, to +3, representing the positive pole, with 0 being “neither nor”. CI=Confidence interval. LL=Lower level. UL=Upper level. Within a column, means with different superscripts are significantly different from each other according to their CIs. The cells of the means that are significantly larger than the other means are coloured in dark blue and the cells of the means that are significantly smaller than the other means are coloured in light blue. The cells of the means that are not significantly different from the other means are not coloured. <sup>1</sup> CIs are Bonferroni corrected and BCa bootstrapped. <sup>2</sup> All mean scores are controlled for time of data collection (spring versus autumn).

**Table D2b.** Overall mean scores for belief in global warming, different perceptions about SRM and acceptability of SRM among the general public in the Global South, the ‘non-WEIRD’ Global North, and the ‘WEIRD’ Global North

| Sample                   | N     | Belief in global warming |                         |      | SRM limits global warming |                         |      | SRM addresses causes of global warming |                         |       | SRM increases mitigation efforts |                         |       | SRM is positive for humans and nature |                         |       | SRM is inexpensive   |                         |       | SRM affects countries equally |                         |       | SRM is acceptable |                         |      |
|--------------------------|-------|--------------------------|-------------------------|------|---------------------------|-------------------------|------|----------------------------------------|-------------------------|-------|----------------------------------|-------------------------|-------|---------------------------------------|-------------------------|-------|----------------------|-------------------------|-------|-------------------------------|-------------------------|-------|-------------------|-------------------------|------|
|                          |       | M <sup>2</sup>           | 96.667% CI <sup>1</sup> |      | M <sup>2</sup>            | 96.667% CI <sup>1</sup> |      | M <sup>2</sup>                         | 96.667% CI <sup>1</sup> |       | M <sup>2</sup>                   | 96.667% CI <sup>1</sup> |       | M <sup>2</sup>                        | 96.667% CI <sup>1</sup> |       | M <sup>2</sup>       | 96.667% CI <sup>1</sup> |       | M <sup>2</sup>                | 96.667% CI <sup>1</sup> |       | M <sup>2</sup>    | 96.667% CI <sup>1</sup> |      |
|                          |       |                          | LL                      | UL   |                           | LL                      | UL   |                                        | LL                      | UL    |                                  | LL                      | UL    |                                       | LL                      | UL    |                      | LL                      | UL    |                               | LL                      | UL    |                   | LL                      | UL   |
| Global South (Iran)      | 170   | 1.57 <sup>b</sup>        | 1.42                    | 1.72 | 1.04 <sup>a</sup>         | 0.80                    | 1.26 | 1.82 <sup>a</sup>                      | 1.63                    | 2.01  | -0.50 <sup>a</sup>               | -0.76                   | -0.24 | 0.08 <sup>a</sup>                     | -0.11                   | 0.27  | -0.91 <sup>a,b</sup> | -1.12                   | -0.69 | -1.08 <sup>a</sup>            | -1.33                   | -0.82 | 0.86 <sup>a</sup> | 0.64                    | 1.08 |
| ‘Non-WEIRD’ Global North | 372   | 1.96 <sup>a</sup>        | 1.86                    | 2.06 | 0.25 <sup>b</sup>         | 0.06                    | 0.44 | -0.35 <sup>b</sup>                     | -0.55                   | -0.15 | -0.53 <sup>a</sup>               | -0.70                   | -0.37 | -0.38 <sup>b</sup>                    | -0.54                   | -0.22 | -1.13 <sup>b</sup>   | -1.30                   | -0.96 | -0.98 <sup>a</sup>            | -1.15                   | -0.79 | 0.12 <sup>b</sup> | -0.03                   | 0.27 |
| ‘WEIRD’ Global North     | 1,703 | 1.91 <sup>a</sup>        | 1.85                    | 1.97 | 0.43 <sup>b</sup>         | 0.34                    | 0.51 | -0.70 <sup>c</sup>                     | -0.79                   | -0.61 | -0.87 <sup>b</sup>               | -0.96                   | -0.79 | -0.32 <sup>b</sup>                    | -0.39                   | -0.24 | -0.79 <sup>a</sup>   | -0.88                   | -0.70 | -1.13 <sup>a</sup>            | -1.21                   | -1.05 | 0.23 <sup>b</sup> | 0.14                    | 0.31 |

Note. Belief in global warming and all perceptions about and acceptability of SRM were measured with bipolar response scales ranging from -3, representing the negative pole, to +3, representing the positive pole, with 0 being “neither nor”. CI=Confidence interval. LL=Lower level. UL=Upper level. Within a column, means with different superscripts are significantly different from each other according to their CIs. The cells of the means that are significantly larger than the other means are coloured in dark blue and the cells of the means that are significantly smaller than the other means are coloured in light blue or orange. The cells of the means that are not significantly different from the other means are not coloured. <sup>1</sup> CIs are Bonferroni corrected and BCa bootstrapped. <sup>2</sup> All mean scores are controlled for time of data collection (spring versus autumn) and for education level.

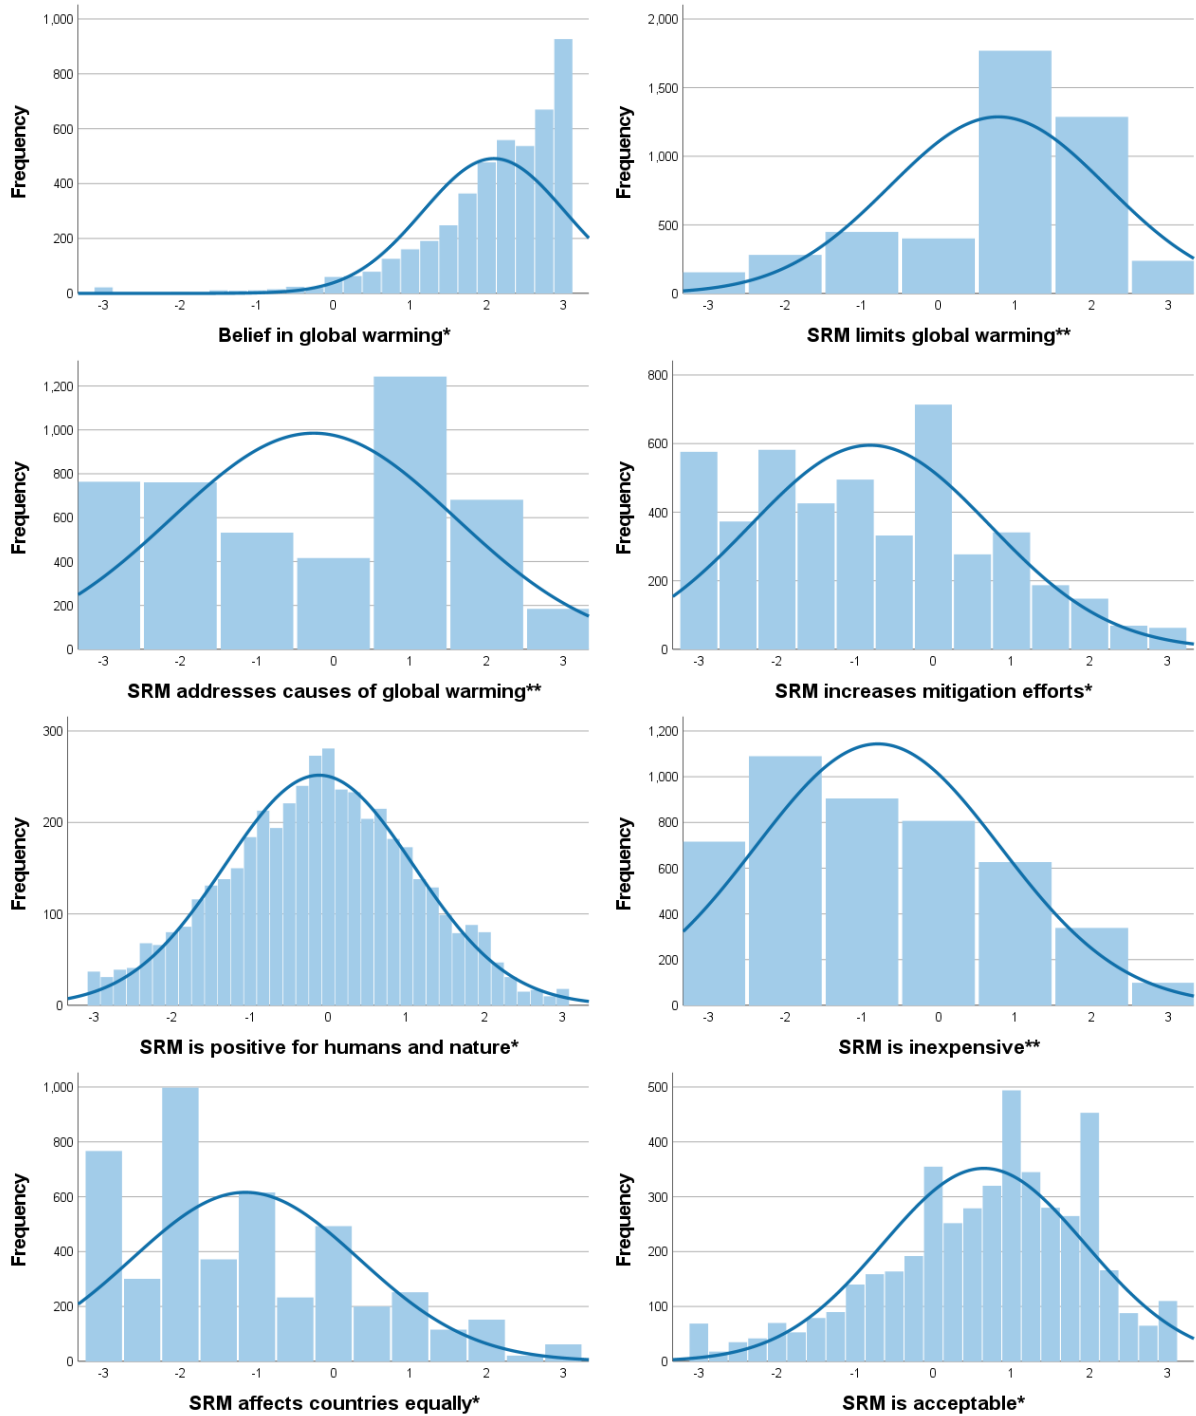

**Fig. D1a. Distributions in belief in global warming, perceptions about SRM and acceptability of SRM in the full student sample ( $N=4,583$ )**

Belief in global warming and all perceptions about and acceptability of SRM were measured with bipolar response scales ranging from -3, representing the negative pole, to +3, representing the positive pole, with 0 being “neither nor”. \* Multi-item measure. \*\* Single item measure.

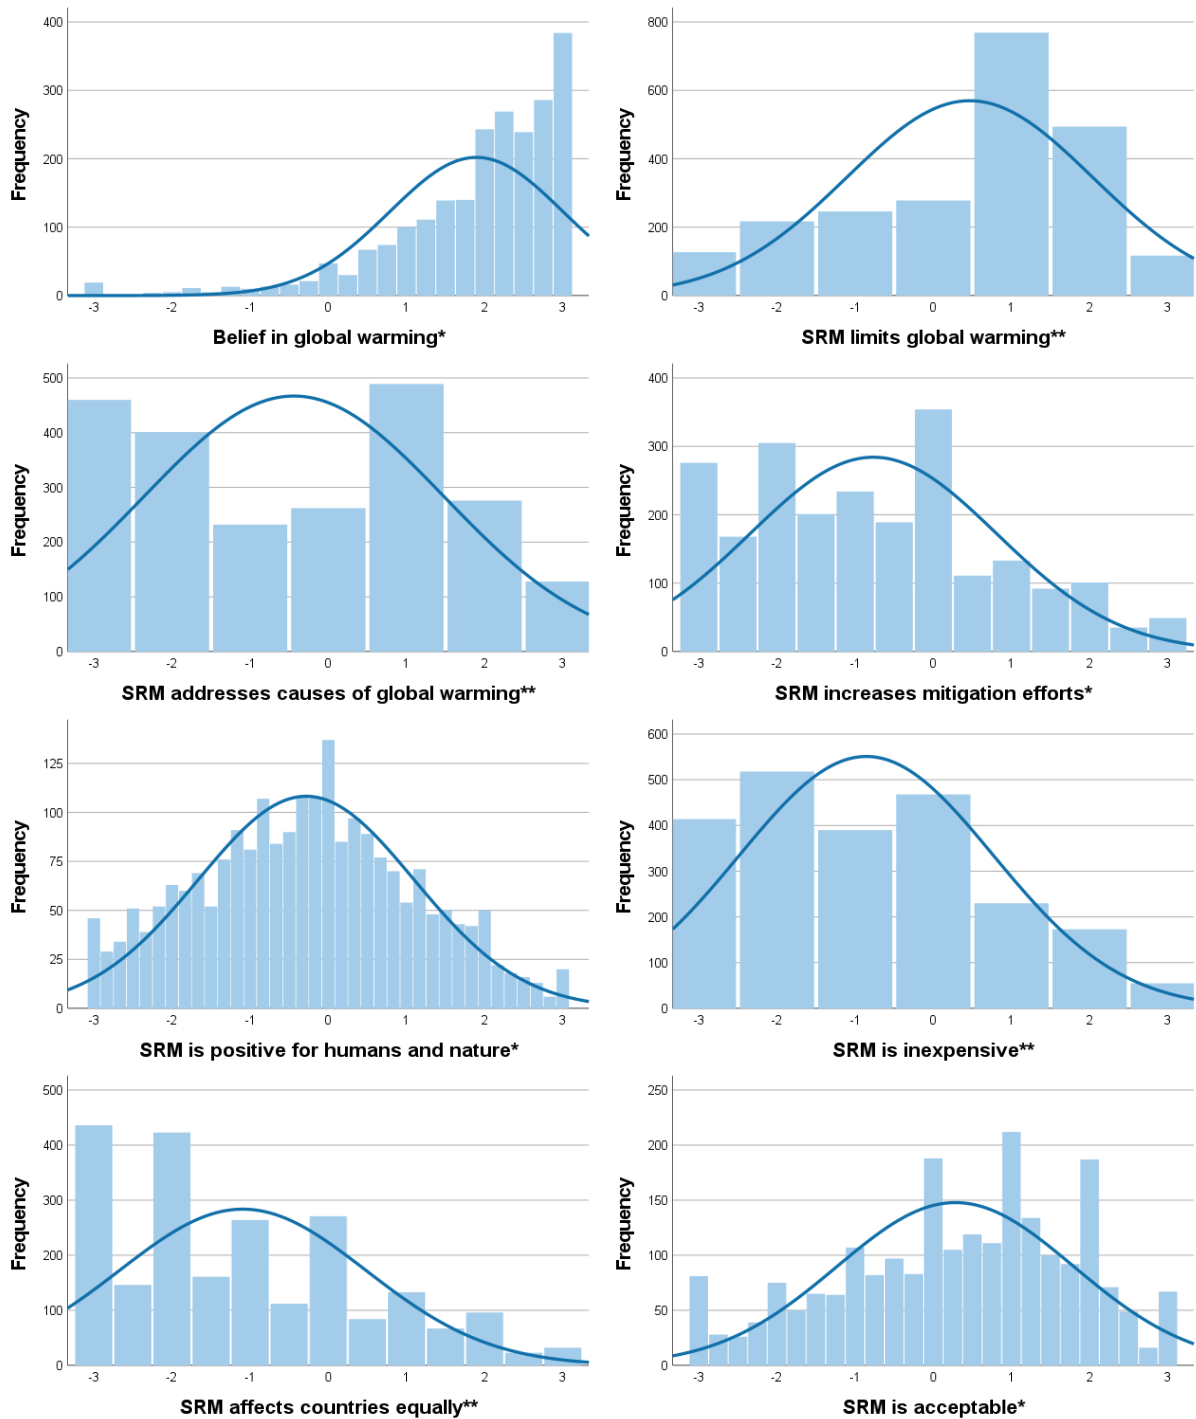

**Fig. D1b. Distributions in belief in global warming, perceptions about SRM and acceptability of SRM in the full general public sample (N=2,248)**

Belief in global warming and all perceptions about and acceptability of SRM were measured with bipolar response scales ranging from -3, representing the negative pole, to +3, representing the positive pole, with 0 being “neither nor”. \* Multi-item measure. \*\* Single item measure.

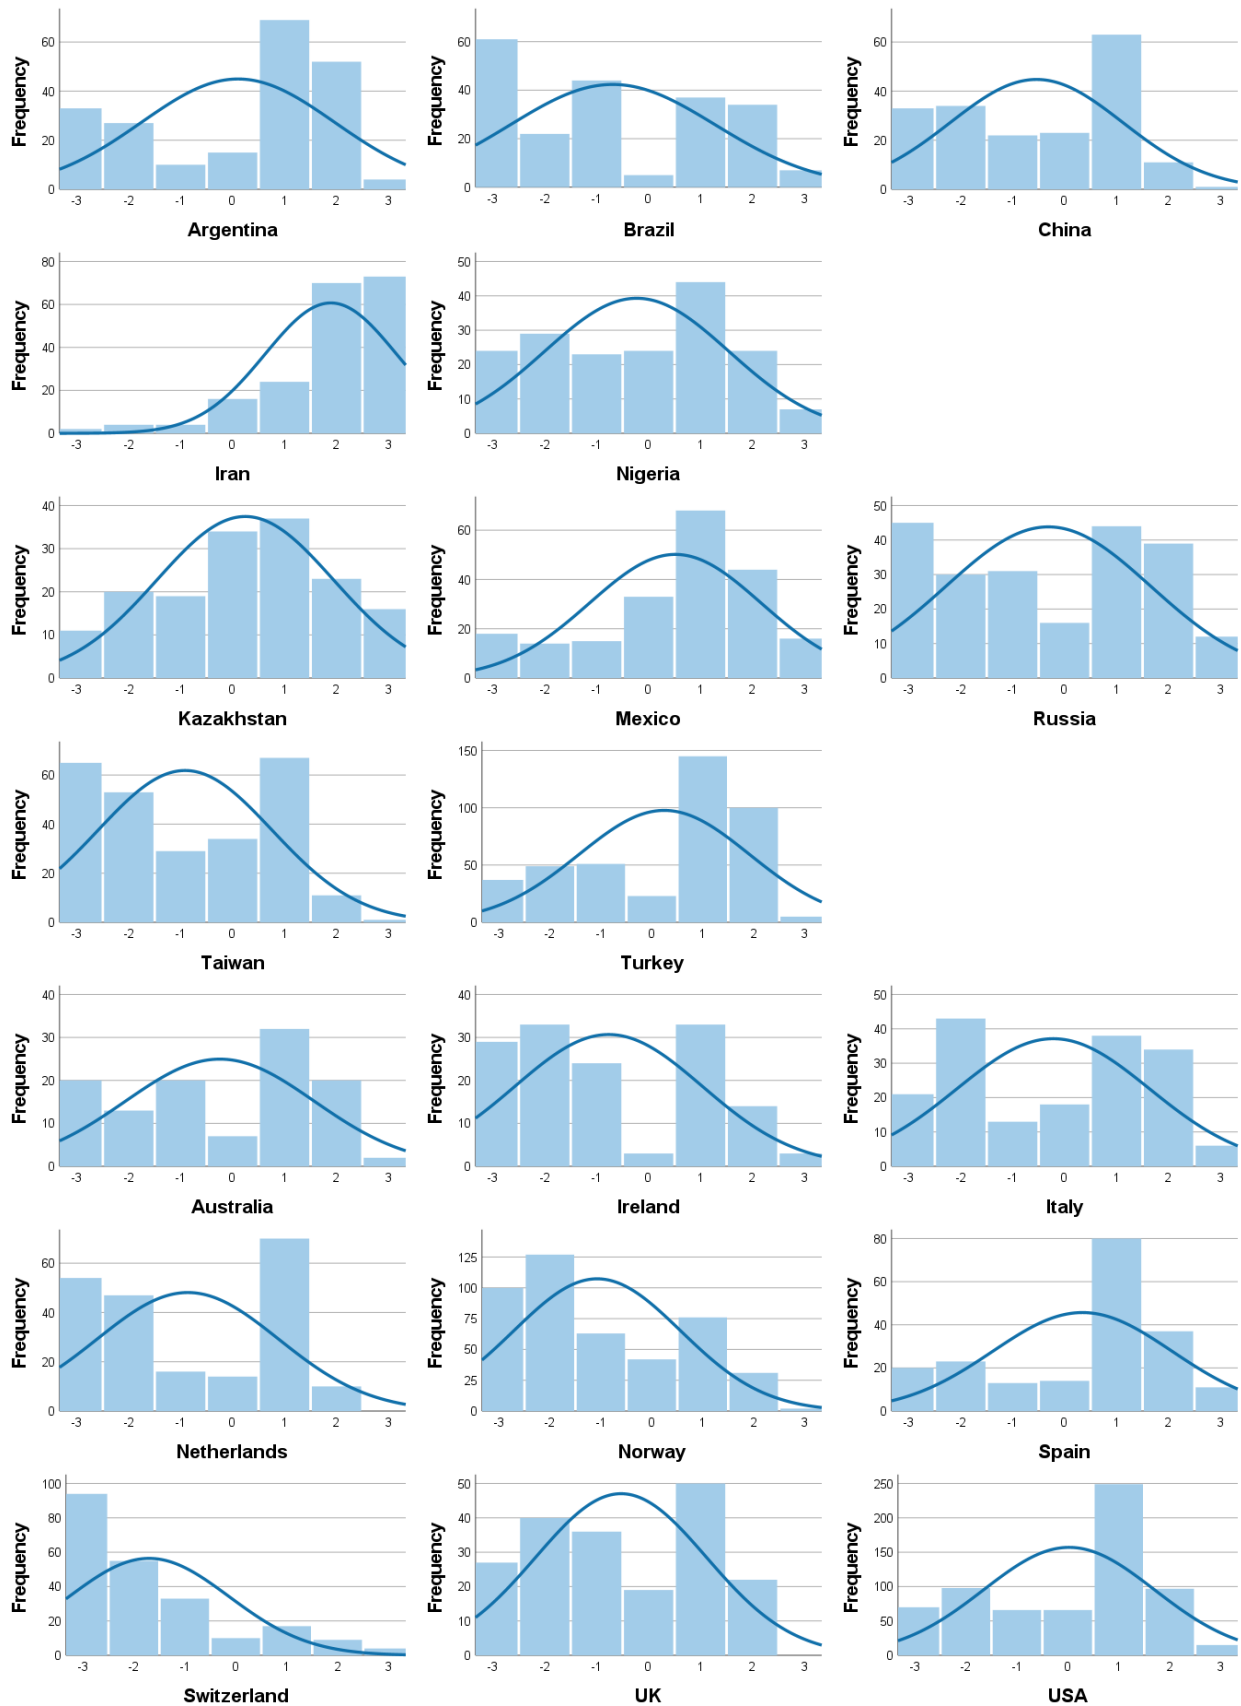

**Fig. D2a. Distributions in the perception that SRM addresses the causes of global warming among students in each country**

This perception was measured with a single item with a bipolar response scale ranging from -3 = [SRM would] *totally not address the causes of global warming* to +3 = [SRM would] *totally address the causes of global warming* with 0 being “neither nor”.

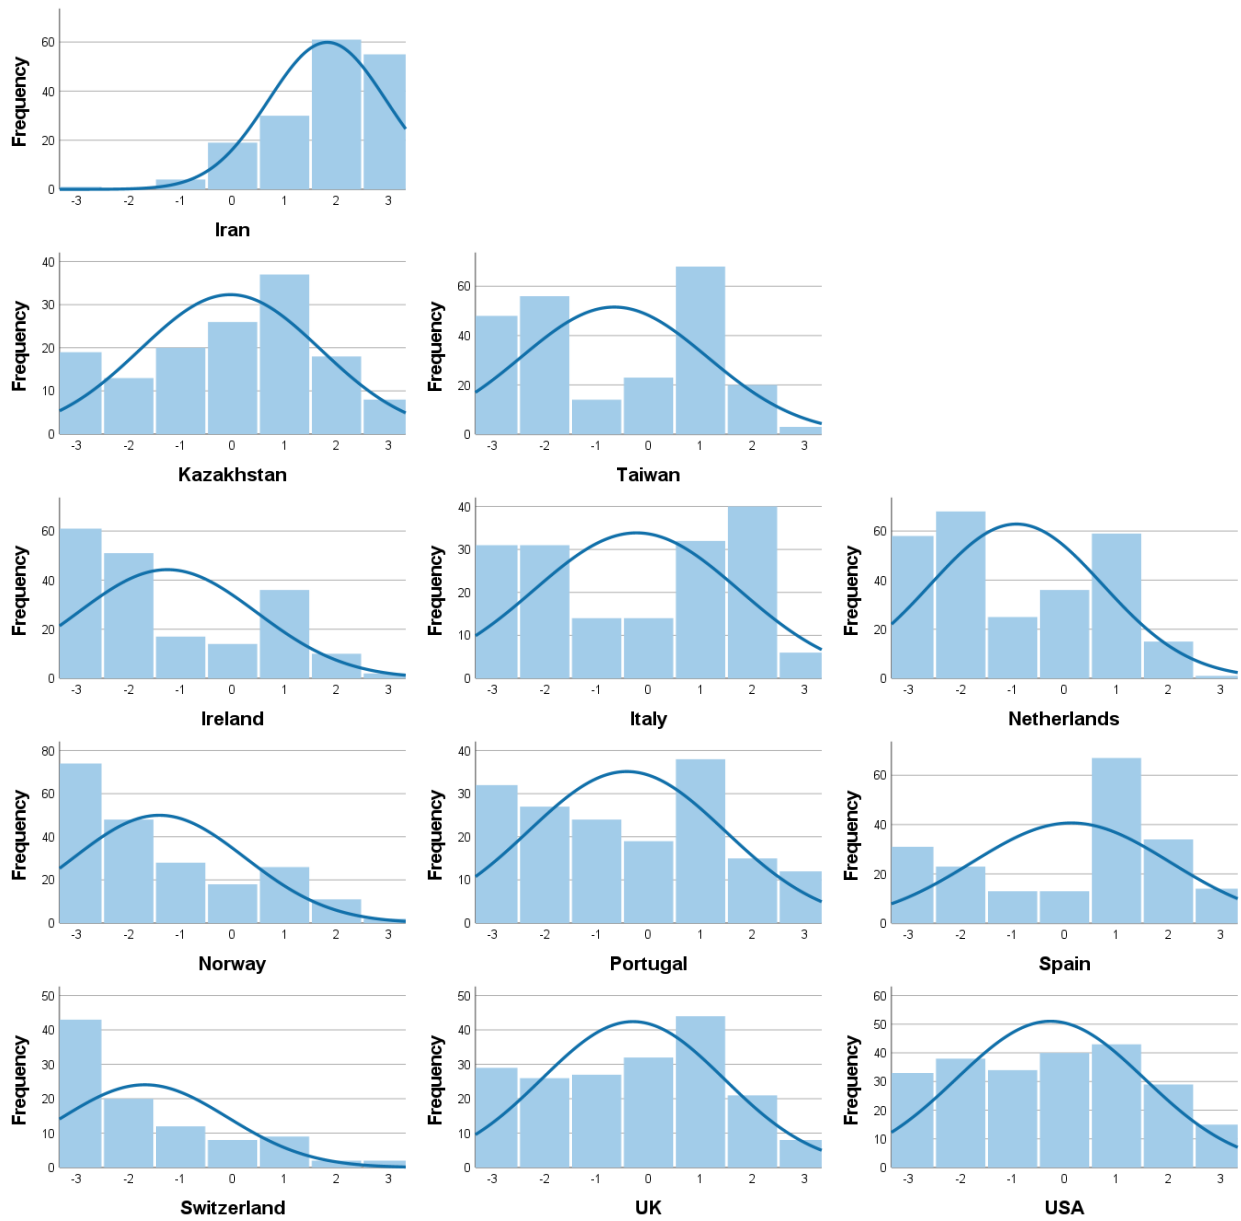

**Fig. D2b. Distributions in the perception that SRM addresses the causes of global warming among the general public in each country**

This perception was measured with a single item with a bipolar response scale ranging from -3 = [SRM would] totally not address the causes of global warming to +3 = [SRM would] totally address the causes of global warming with 0 being “neither nor”.
