# Supplementary material for: Public opinion about solar radiation management: A cross-cultural study in 20 countries around the world
Source: Springer Nature journal article supplement (doi:10.1007/s10584-024-03708-3), 2024-03-29
Supplement: MOESM5 [file 10584_2024_3708_MOESM5_ESM.pdf]

## **Supplementary information E of the paper Public opinion about solar radiation management: A cross-cultural study in 20 countries around the world**

### **Detailed results of the simple regression analyses and generalised estimating equations**

#### **Content of Supplementary information E:**

- Table E1a. Associations between belief in global warming and the acceptability of SRM among students
- Table E1b. Associations between the perception that SRM limits global warming and the acceptability of SRM among students
- Table E1c. Associations between the perception that SRM addresses the causes of global warming and the acceptability of SRM among students
- Table E1d. Associations between the perception that SRM increases the efforts to mitigate global warming and the acceptability of SRM among students
- Table E1e. Associations between the perception that SRM has a positive impact on humans and nature and the acceptability of SRM among students
- Table E1f. Associations between the perception that SRM is inexpensive and the acceptability of SRM among students
- Table E1g. Associations between the perception that SRM affects countries equally and the acceptability of SRM among students
- Table E2a. Associations between the belief in global warming and the perception that SRM limits global warming with acceptability of SRM among the general public
- Table E2b. Associations between the perceptions that SRM addresses the causes of global warming and that SRM increases the efforts to mitigate global warming with acceptability of SRM among the general public
- Table E2c. Associations between the perceptions that SRM has a positive impact on humans and nature and that SRM is inexpensive with acceptability of SRM among the general public
- Table E2d. Associations between the perception that SRM affects countries equally and the acceptability of SRM among the general public
- Table E3a. Associations between belief in global warming and perceptions about SRM with acceptability of SRM among students in the Global South, the ‘non-WEIRD’ Global North, and the ‘WEIRD’ Global North
- Table E3b. Associations between belief in global warming and perceptions about SRM with acceptability of SRM among the general public in the Global South, the ‘non-WEIRD’ Global North, and the ‘WEIRD’ Global North

**Table E1a.** Associations between belief in global warming and the acceptability of SRM among students

| Cluster                  | Sample                   | N         |           | B       | SE    | 99.737% CI <sup>1</sup> |      | $\beta$                    | Model test                 |
|--------------------------|--------------------------|-----------|-----------|---------|-------|-------------------------|------|----------------------------|----------------------------|
|                          |                          |           |           |         |       | LL                      | UL   |                            |                            |
|                          | Overall                  | 4,583     | Constant  | 0.16*   | 0.07  | -0.05                   | 0.38 |                            | n.a.                       |
|                          |                          |           | Predictor | 0.23*** | 0.02  | 0.17                    | 0.30 | .15                        |                            |
| Global South             | Argentina                | 210       | Constant  | -0.34   | 0.54  | -1.79                   | 1.59 |                            | $R^2=.05, F(1,208)=11.61*$ |
|                          |                          |           | Predictor | 0.57    | 0.21  | -0.07                   | 1.10 | .23                        |                            |
|                          | Brazil                   | 210       | Constant  | 0.79    | 0.27  | -0.07                   | 1.71 |                            | $R^2<.01, F(1,208)=0.03$   |
|                          |                          |           | Predictor | 0.02    | 0.12  | -0.40                   | 0.40 | .01                        |                            |
|                          | China                    | 187       | Constant  | 0.44    | 0.19  | -0.21                   | 0.93 |                            | $R^2=.01, F(1,185)=2.11$   |
|                          |                          |           | Predictor | 0.15    | 0.11  | -0.14                   | 0.52 | .11                        |                            |
| Iran <sup>2</sup>        | 193                      | Constant  | 0.47      | 0.24    | -0.23 | 1.07                    |      | $R^2=.02, F(1,191)=3.22$   |                            |
|                          |                          | Predictor | 0.17      | 0.13    | -0.17 | 0.60                    | .13  |                            |                            |
| Nigeria                  | 175                      | Constant  | 0.12      | 0.12    | -0.27 | 0.47                    |      | $R^2=.13, F(1,173)=25.30*$ |                            |
|                          |                          | Predictor | 0.35*     | 0.07    | 0.14  | 0.58                    | .36  |                            |                            |
| 'Non-WEIRD' Global North | Kazakhstan <sup>2</sup>  | 160       | Constant  | -0.24   | 0.15  | -0.77                   | 0.21 |                            | $R^2=.04, F(1,158)=6.91$   |
|                          |                          |           | Predictor | 0.22    | 0.08  | -0.02                   | 0.50 | .20                        |                            |
|                          | Mexico                   | 208       | Constant  | 0.33    | 0.25  | -0.46                   | 1.09 |                            | $R^2=.06, F(1,206)=12.00*$ |
|                          |                          |           | Predictor | 0.35*   | 0.10  | 0.03                    | 0.63 | .23                        |                            |
|                          | Russia                   | 217       | Constant  | -0.14   | 0.17  | -0.69                   | 0.33 |                            | $R^2=.07, F(1,215)=15.87*$ |
|                          |                          |           | Predictor | 0.33*   | 0.09  | 0.07                    | 0.65 | .26                        |                            |
| Taiwan <sup>2</sup>      | 260                      | Constant  | 0.50*     | 0.15    | 0.01  | 1.02                    |      | $R^2<.01, F(1,258)=0.04$   |                            |
|                          |                          | Predictor | 0.02      | 0.08    | -0.23 | 0.25                    | .01  |                            |                            |
| Turkey                   | 410                      | Constant  | 0.12      | 0.24    | -0.73 | 0.88                    |      | $R^2=.01, F(1,408)=3.35$   |                            |
|                          |                          | Predictor | 0.19      | 0.10    | -0.13 | 0.52                    | .09  |                            |                            |
| 'WEIRD' Global North     | Australia                | 114       | Constant  | 0.40    | 0.45  | -0.94                   | 1.72 |                            | $R^2=.01, F(1,112)=0.98$   |
|                          |                          |           | Predictor | 0.19    | 0.19  | -0.37                   | 0.76 | .09                        |                            |
|                          | Ireland <sup>2</sup>     | 139       | Constant  | -0.50   | 0.35  | -1.53                   | 0.85 |                            | $R^2=.14, F(1,137)=21.62*$ |
|                          |                          |           | Predictor | 0.60*   | 0.15  | 0.08                    | 1.03 | .37                        |                            |
|                          | Italy <sup>2</sup>       | 173       | Constant  | -0.03   | 0.23  | -0.66                   | 0.99 |                            | $R^2=.01, F(1,171)=1.22$   |
|                          |                          |           | Predictor | 0.14    | 0.10  | -0.28                   | 0.40 | .08                        |                            |
|                          | Netherlands <sup>2</sup> | 211       | Constant  | 0.82*   | 0.23  | 0.12                    | 1.57 |                            | $R^2<.01, F(1,209)=0.58$   |
|                          |                          |           | Predictor | -0.08   | 0.11  | -0.42                   | 0.25 | -.05                       |                            |
|                          | Norway <sup>2</sup>      | 441       | Constant  | 0.21    | 0.23  | -0.50                   | 0.91 |                            | $R^2=.01, F(1,439)=3.09$   |
|                          |                          |           | Predictor | 0.16    | 0.09  | -0.12                   | 0.45 | .08                        |                            |
|                          | Spain <sup>2</sup>       | 198       | Constant  | 0.40    | 0.42  | -0.97                   | 1.71 |                            | $R^2<.01, F(1,196)=0.89$   |
|                          |                          |           | Predictor | 0.18    | 0.16  | -0.32                   | 0.70 | .07                        |                            |
| Switzerland <sup>2</sup> | 222                      | Constant  | -0.08     | 0.28    | -0.85 | 0.94                    |      | $R^2<.01, F(1,220)=0.04$   |                            |
|                          |                          | Predictor | -0.02     | 0.12    | -0.44 | 0.27                    | -.01 |                            |                            |
| UK <sup>2</sup>          | 194                      | Constant  | 0.66*     | 0.14    | 0.14  | 1.11                    |      | $R^2=.01, F(1,192)=1.97$   |                            |
|                          |                          | Predictor | 0.13      | 0.06    | -0.06 | 0.37                    | .10  |                            |                            |
| USA <sup>2</sup>         | 661                      | Constant  | 0.09      | 0.10    | -0.21 | 0.40                    |      | $R^2=.09, F(1,659)=63.37*$ |                            |
|                          |                          | Predictor | 0.33*     | 0.05    | 0.18  | 0.48                    | .30  |                            |                            |

Note. CI=Confidence interval. LL=Lower level. UL=Upper level. n.a.=not applicable as in generalized estimating equations no omnibus test is run. <sup>1</sup> The Bonferroni corrected CIs are Wald CIs in case of the full sample and BCa bootstrap CIs in case of the country samples. <sup>2</sup> Data were also collected among the general public. \*  $p \leq .05$ . \*\*  $p \leq .01$ . \*\*\*  $p \leq .001$ . \* Significant at the Bonferroni corrected BCa bootstrap  $p \leq .00278$ .

**Table E1b.** Associations between the perception that SRM limits global warming and the acceptability of SRM among students

| Cluster      | Sample                   | N     |           | B       | SE   | 99.737% CI <sup>1</sup> |       | $\beta$ | Model test                  |
|--------------|--------------------------|-------|-----------|---------|------|-------------------------|-------|---------|-----------------------------|
|              |                          |       |           |         |      | LL                      | UL    |         |                             |
| Overall      |                          | 4,583 | Constant  | 0.24*** | 0.05 | 0.08                    | 0.40  | .59     | n.a.                        |
|              |                          |       | Predictor | 0.54*** | 0.01 | 0.51                    | 0.57  |         |                             |
| Global South | Argentina                | 210   | Constant  | 0.62*   | 0.10 | 0.35                    | 0.92  | .53     | $R^2=.28, F(1,208)=80.02*$  |
|              |                          |       | Predictor | 0.49*   | 0.06 | 0.28                    | 0.69  |         |                             |
|              | Brazil                   | 210   | Constant  | 0.44*   | 0.09 | 0.15                    | 0.74  | .68     | $R^2=.46, F(1,208)=178.49*$ |
|              |                          |       | Predictor | 0.60*   | 0.05 | 0.43                    | 0.76  |         |                             |
|              | China                    | 187   | Constant  | 0.11    | 0.11 | -0.18                   | 0.44  | .55     | $R^2=.31, F(1,185)=81.50*$  |
|              |                          |       | Predictor | 0.62*   | 0.08 | 0.37                    | 0.82  |         |                             |
|              | Iran <sup>2</sup>        | 193   | Constant  | 0.30*   | 0.09 | 0.04                    | 0.58  | .56     | $R^2=.31, F(1,191)=86.98*$  |
|              |                          |       | Predictor | 0.47*   | 0.05 | 0.30                    | 0.63  |         |                             |
|              | Nigeria                  | 175   | Constant  | 0.38*   | 0.08 | 0.13                    | 0.63  | .61     | $R^2=.38, F(1,173)=104.51*$ |
|              |                          |       | Predictor | 0.45*   | 0.05 | 0.30                    | 0.61  |         |                             |
| 'Non-WEIRD'  | Kazakhstan <sup>2</sup>  | 160   | Constant  | 0.01    | 0.09 | -0.27                   | 0.27  | .55     | $R^2=.30, F(1,158)=66.92*$  |
|              |                          |       | Predictor | 0.40*   | 0.06 | 0.23                    | 0.57  |         |                             |
| Global North | Mexico                   | 208   | Constant  | 0.70*   | 0.10 | 0.41                    | 1.02  | .62     | $R^2=.38, F(1,206)=126.03*$ |
|              |                          |       | Predictor | 0.55*   | 0.06 | 0.37                    | 0.73  |         |                             |
|              | Russia                   | 217   | Constant  | 0.09    | 0.07 | -0.15                   | 0.31  | .66     | $R^2=.43, F(1,215)=161.73*$ |
|              |                          |       | Predictor | 0.50*   | 0.04 | 0.35                    | 0.63  |         |                             |
|              | Taiwan <sup>2</sup>      | 260   | Constant  | 0.11    | 0.07 | -0.09                   | 0.33  | .57     | $R^2=.33, F(1,258)=126.24*$ |
|              |                          |       | Predictor | 0.50*   | 0.06 | 0.34                    | 0.66  |         |                             |
|              | Turkey                   | 410   | Constant  | 0.03    | 0.07 | -0.19                   | 0.23  | .59     | $R^2=.34, F(1,408)=214.05*$ |
|              |                          |       | Predictor | 0.62*   | 0.05 | 0.47                    | 0.76  |         |                             |
| 'WEIRD'      | Australia                | 114   | Constant  | 0.15    | 0.14 | -0.26                   | 0.62  | .67     | $R^2=.44, F(1,112)=89.34*$  |
|              |                          |       | Predictor | 0.66*   | 0.09 | 0.37                    | 0.90  |         |                             |
| Global North | Ireland <sup>2</sup>     | 139   | Constant  | 0.33    | 0.11 | 0.01                    | 0.69  | .67     | $R^2=.45, F(1,137)=112.33*$ |
|              |                          |       | Predictor | 0.65*   | 0.06 | 0.47                    | 0.81  |         |                             |
|              | Italy <sup>2</sup>       | 173   | Constant  | 0.11    | 0.07 | -0.13                   | 0.34  | .80     | $R^2=.64, F(1,171)=306.35*$ |
|              |                          |       | Predictor | 0.70*   | 0.04 | 0.58                    | 0.80  |         |                             |
|              | Netherlands <sup>2</sup> | 211   | Constant  | 0.23    | 0.08 | -0.06                   | 0.50  | .50     | $R^2=.25, F(1,209)=70.97*$  |
|              |                          |       | Predictor | 0.45*   | 0.05 | 0.28                    | 0.60  |         |                             |
|              | Norway <sup>2</sup>      | 441   | Constant  | 0.16    | 0.06 | -0.03                   | 0.34  | .55     | $R^2=.30, F(1,439)=188.51*$ |
|              |                          |       | Predictor | 0.49*   | 0.03 | 0.38                    | 0.59  |         |                             |
|              | Spain <sup>2</sup>       | 198   | Constant  | 0.41*   | 0.10 | 0.11                    | 0.73  | .59     | $R^2=.34, F(1,196)=102.66*$ |
|              |                          |       | Predictor | 0.57*   | 0.06 | 0.37                    | 0.76  |         |                             |
|              | Switzerland <sup>2</sup> | 222   | Constant  | -0.51*  | 0.08 | -0.76                   | -0.26 | .44     | $R^2=.19, F(1,220)=51.82*$  |
|              |                          |       | Predictor | 0.44*   | 0.05 | 0.26                    | 0.58  |         |                             |
|              | UK <sup>2</sup>          | 194   | Constant  | 0.53*   | 0.10 | 0.22                    | 0.81  | .51     | $R^2=.26, F(1,192)=65.82*$  |
|              |                          |       | Predictor | 0.49*   | 0.07 | 0.26                    | 0.69  |         |                             |
|              | USA <sup>2</sup>         | 661   | Constant  | 0.26*   | 0.05 | 0.12                    | 0.41  | .66     | $R^2=.43, F(1,659)=501.53*$ |
|              |                          |       | Predictor | 0.61*   | 0.03 | 0.51                    | 0.71  |         |                             |

Note. CI=Confidence interval. LL=Lower level. UL=Upper level. n.a.=not applicable as in generalized estimating equations no omnibus test is run. <sup>1</sup> The Bonferroni corrected CIs are Wald CIs in case of the full sample and BCa bootstrap CIs in case of the country samples. <sup>2</sup> Data were also collected among the general public. \*  $p \leq .05$ . \*\*  $p \leq .01$ . \*\*\*  $p \leq .001$ . \* Significant at the Bonferroni corrected BCa bootstrap  $p \leq .00278$ .

**Table E1c.** Associations between the perception that SRM addresses the causes of global warming and the acceptability of SRM among students

| Cluster                     | Sample                   | N     | B         | SE      | 99.737% CI <sup>1</sup> |       | $\beta$ | Model test                  |
|-----------------------------|--------------------------|-------|-----------|---------|-------------------------|-------|---------|-----------------------------|
|                             |                          |       |           |         | LL                      | UL    |         |                             |
|                             | Overall                  | 4,583 | Constant  | 0.73*** | 0.06                    | 0.56  | 0.90    | n.a.                        |
|                             |                          |       | Predictor | 0.33*** | 0.01                    | 0.30  | 0.36    |                             |
| Global South                | Argentina                | 210   | Constant  | 1.06*   | 0.08                    | 0.76  | 1.31    | $R^2=.15, F(1,208)=36.81*$  |
|                             |                          |       | Predictor | 0.27*   | 0.05                    | 0.13  | 0.42    |                             |
|                             | Brazil                   | 210   | Constant  | 1.05*   | 0.08                    | 0.82  | 1.28    | $R^2=.20, F(1,208)=53.39*$  |
|                             |                          |       | Predictor | 0.32*   | 0.04                    | 0.18  | 0.45    |                             |
|                             | China                    | 187   | Constant  | 0.91*   | 0.07                    | 0.70  | 1.12    | $R^2=.29, F(1,185)=76.30*$  |
|                             |                          |       | Predictor | 0.38*   | 0.05                    | 0.24  | 0.52    |                             |
|                             | Iran <sup>2</sup>        | 193   | Constant  | 0.26    | 0.14                    | -0.17 | 0.78    | $R^2=.08, F(1,191)=16.25*$  |
|                             |                          |       | Predictor | 0.26*   | 0.06                    | 0.03  | 0.47    |                             |
|                             | Nigeria                  | 175   | Constant  | 0.61*   | 0.09                    | 0.32  | 0.88    | $R^2=.11, F(1,173)=22.27*$  |
|                             |                          |       | Predictor | 0.24*   | 0.05                    | 0.08  | 0.41    |                             |
| 'Non-WEIRD'<br>Global North | Kazakhstan <sup>2</sup>  | 160   | Constant  | -0.05   | 0.09                    | -0.33 | 0.23    | $R^2=.23, F(1,158)=48.22*$  |
|                             |                          |       | Predictor | 0.38*   | 0.06                    | 0.17  | 0.58    |                             |
|                             | Mexico                   | 208   | Constant  | 0.94*   | 0.09                    | 0.67  | 1.20    | $R^2=.24, F(1,206)=64.63*$  |
|                             |                          |       | Predictor | 0.37*   | 0.06                    | 0.18  | 0.55    |                             |
|                             | Russia                   | 217   | Constant  | 0.48*   | 0.07                    | 0.24  | 0.69    | $R^2=.21, F(1,215)=58.24*$  |
|                             |                          |       | Predictor | 0.30*   | 0.04                    | 0.18  | 0.43    |                             |
|                             | Taiwan <sup>2</sup>      | 260   | Constant  | 0.82*   | 0.06                    | 0.64  | 0.99    | $R^2=.25, F(1,258)=87.16*$  |
|                             |                          |       | Predictor | 0.31*   | 0.03                    | 0.21  | 0.41    |                             |
|                             | Turkey                   | 410   | Constant  | 0.49*   | 0.06                    | 0.29  | 0.68    | $R^2=.17, F(1,408)=83.13*$  |
|                             |                          |       | Predictor | 0.32*   | 0.04                    | 0.20  | 0.44    |                             |
| 'WEIRD'<br>Global North     | Australia                | 114   | Constant  | 0.94*   | 0.10                    | 0.62  | 1.28    | $R^2=.24, F(1,112)=34.50*$  |
|                             |                          |       | Predictor | 0.35*   | 0.07                    | 0.14  | 0.54    |                             |
|                             | Ireland <sup>2</sup>     | 139   | Constant  | 1.12*   | 0.09                    | 0.84  | 1.39    | $R^2=.17, F(1,137)=28.61*$  |
|                             |                          |       | Predictor | 0.31*   | 0.06                    | 0.14  | 0.48    |                             |
|                             | Italy <sup>2</sup>       | 173   | Constant  | 0.40*   | 0.08                    | 0.15  | 0.64    | $R^2=.48, F(1,171)=155.63*$ |
|                             |                          |       | Predictor | 0.57*   | 0.05                    | 0.43  | 0.70    |                             |
|                             | Netherlands <sup>2</sup> | 211   | Constant  | 0.87*   | 0.07                    | 0.66  | 1.09    | $R^2=.14, F(1,209)=35.41*$  |
|                             |                          |       | Predictor | 0.25*   | 0.04                    | 0.12  | 0.39    |                             |
|                             | Norway <sup>2</sup>      | 441   | Constant  | 0.90*   | 0.06                    | 0.71  | 1.07    | $R^2=.12, F(1,439)=61.76*$  |
|                             |                          |       | Predictor | 0.27*   | 0.03                    | 0.17  | 0.37    |                             |
|                             | Spain <sup>2</sup>       | 198   | Constant  | 0.71*   | 0.09                    | 0.44  | 0.98    | $R^2=.30, F(1,196)=84.79*$  |
|                             |                          |       | Predictor | 0.43*   | 0.06                    | 0.25  | 0.61    |                             |
|                             | Switzerland <sup>2</sup> | 222   | Constant  | 0.44*   | 0.12                    | 0.07  | 0.84    | $R^2=.16, F(1,220)=41.03*$  |
|                             |                          |       | Predictor | 0.33*   | 0.06                    | 0.16  | 0.52    |                             |
|                             | UK <sup>2</sup>          | 194   | Constant  | 1.10*   | 0.07                    | 0.89  | 1.33    | $R^2=.17, F(1,192)=38.36*$  |
|                             |                          |       | Predictor | 0.29*   | 0.05                    | 0.14  | 0.42    |                             |
|                             | USA <sup>2</sup>         | 661   | Constant  | 0.74*   | 0.04                    | 0.62  | 0.87    | $R^2=.24, F(1,659)=204.13*$ |
|                             |                          |       | Predictor | 0.35*   | 0.03                    | 0.27  | 0.45    |                             |

*Note.* CI=Confidence interval. LL=Lower level. UL=Upper level. n.a.=not applicable as in generalized estimating equations no omnibus test is run. <sup>1</sup> The Bonferroni corrected CIs are Wald CIs in case of the full sample and BCa bootstrap CIs in case of the country samples. <sup>2</sup> Data were also collected among the general public. \*  $p \leq .05$ . \*\*  $p \leq .01$ . \*\*\*  $p \leq .001$ . \* Significant at the Bonferroni corrected BCa bootstrap  $p \leq .00278$ .

**Table E1d.** Associations between the perception that SRM increases the efforts to mitigate global warming and the acceptability of SRM among students

|                          | Sample                   | N     | B         | SE      | 99.737% CI <sup>1</sup> |       | $\beta$ | Model test                  |
|--------------------------|--------------------------|-------|-----------|---------|-------------------------|-------|---------|-----------------------------|
|                          |                          |       |           |         | LL                      | UL    |         |                             |
| Cluster                  | Overall                  | 4,583 | Constant  | 0.93*** | 0.05                    | 0.78  | 1.07    | n.a.                        |
|                          |                          |       | Predictor | 0.35*** | 0.01                    | 0.31  | 0.38    |                             |
| Global South             | Argentina                | 210   | Constant  | 1.25*   | 0.09                    | 0.97  | 1.50    | $R^2=.09, F(1,208)=20.38*$  |
|                          |                          |       | Predictor | 0.25*   | 0.06                    | 0.06  | 0.42    |                             |
|                          | Brazil                   | 210   | Constant  | 1.33*   | 0.09                    | 1.01  | 1.58    | $R^2=.22, F(1,208)=60.07*$  |
|                          |                          |       | Predictor | 0.42*   | 0.05                    | 0.25  | 0.57    |                             |
|                          | China                    | 187   | Constant  | 0.82*   | 0.07                    | 0.61  | 1.02    | $R^2=.25, F(1,185)=62.13*$  |
|                          |                          |       | Predictor | 0.39*   | 0.06                    | 0.21  | 0.56    |                             |
|                          | Iran <sup>2</sup>        | 193   | Constant  | 0.95*   | 0.08                    | 0.70  | 1.17    | $R^2=.16, F(1,191)=36.13*$  |
|                          |                          |       | Predictor | 0.31*   | 0.05                    | 0.15  | 0.47    |                             |
|                          | Nigeria                  | 175   | Constant  | 0.60*   | 0.09                    | 0.33  | 0.88    | $R^2=.04, F(1,173)=7.71*$   |
|                          |                          |       | Predictor | 0.18    | 0.07                    | -0.01 | 0.37    |                             |
| 'Non-WEIRD' Global North | Kazakhstan <sup>2</sup>  | 160   | Constant  | 0.28    | 0.09                    | 0.01  | 0.57    | $R^2=.29, F(1,158)=64.92*$  |
|                          |                          |       | Predictor | 0.46*   | 0.06                    | 0.27  | 0.64    |                             |
|                          | Mexico                   | 208   | Constant  | 1.19*   | 0.08                    | 0.96  | 1.41    | $R^2=.18, F(1,206)=45.89*$  |
|                          |                          |       | Predictor | 0.30*   | 0.05                    | 0.15  | 0.46    |                             |
|                          | Russia                   | 217   | Constant  | 0.69*   | 0.08                    | 0.45  | 0.92    | $R^2=.15, F(1,215)=38.43*$  |
|                          |                          |       | Predictor | 0.34*   | 0.05                    | 0.19  | 0.48    |                             |
|                          | Taiwan <sup>2</sup>      | 260   | Constant  | 0.73*   | 0.07                    | 0.49  | 0.94    | $R^2=.15, F(1,258)=46.07*$  |
|                          |                          |       | Predictor | 0.31*   | 0.06                    | 0.13  | 0.47    |                             |
|                          | Turkey                   | 410   | Constant  | 0.86*   | 0.06                    | 0.68  | 1.04    | $R^2=.13, F(1,408)=58.36*$  |
|                          |                          |       | Predictor | 0.31*   | 0.04                    | 0.18  | 0.44    |                             |
| 'WEIRD' Global North     | Australia                | 114   | Constant  | 1.17*   | 0.11                    | 0.83  | 1.50    | $R^2=.21, F(1,112)=29.70*$  |
|                          |                          |       | Predictor | 0.41*   | 0.08                    | 0.17  | 0.67    |                             |
|                          | Ireland <sup>2</sup>     | 139   | Constant  | 1.32*   | 0.10                    | 0.99  | 1.64    | $R^2=.15, F(1,137)=24.41*$  |
|                          |                          |       | Predictor | 0.37*   | 0.07                    | 0.16  | 0.58    |                             |
|                          | Italy <sup>2</sup>       | 173   | Constant  | 0.81*   | 0.11                    | 0.44  | 1.16    | $R^2=.25, F(1,171)=56.74*$  |
|                          |                          |       | Predictor | 0.52*   | 0.06                    | 0.32  | 0.71    |                             |
|                          | Netherlands <sup>2</sup> | 211   | Constant  | 0.96*   | 0.10                    | 0.65  | 1.27    | $R^2=.07, F(1,209)=14.70*$  |
|                          |                          |       | Predictor | 0.22*   | 0.06                    | 0.06  | 0.40    |                             |
|                          | Norway <sup>2</sup>      | 441   | Constant  | 1.08*   | 0.06                    | 0.88  | 1.27    | $R^2=.18, F(1,439)=93.91*$  |
|                          |                          |       | Predictor | 0.37*   | 0.03                    | 0.27  | 0.47    |                             |
|                          | Spain <sup>2</sup>       | 198   | Constant  | 0.99*   | 0.08                    | 0.74  | 1.25    | $R^2=.21, F(1,196)=52.53*$  |
|                          |                          |       | Predictor | 0.40*   | 0.06                    | 0.22  | 0.56    |                             |
|                          | Switzerland <sup>2</sup> | 222   | Constant  | 0.90*   | 0.11                    | 0.54  | 1.29    | $R^2=.26, F(1,220)=78.22*$  |
|                          |                          |       | Predictor | 0.56*   | 0.06                    | 0.38  | 0.75    |                             |
|                          | UK <sup>2</sup>          | 194   | Constant  | 1.11*   | 0.08                    | 0.86  | 1.35    | $R^2=.05, F(1,192)=11.14*$  |
|                          |                          |       | Predictor | 0.19*   | 0.06                    | 0.02  | 0.36    |                             |
|                          | USA <sup>2</sup>         | 661   | Constant  | 0.92*   | 0.04                    | 0.77  | 1.05    | $R^2=.19, F(1,659)=156.79*$ |
|                          |                          |       | Predictor | 0.36*   | 0.03                    | 0.27  | 0.45    |                             |

*Note.* CI=Confidence interval. LL=Lower level. UL=Upper level. n.a.=not applicable as in generalized estimating equations no omnibus test is run. <sup>1</sup> The Bonferroni corrected CIs are Wald CIs in case of the full sample and BCa bootstrap CIs in case of the country samples. <sup>2</sup> Data were also collected among the general public. \*  $p \leq .05$ . \*\*  $p \leq .01$ . \*\*\*  $p \leq .001$ . \* Significant at the Bonferroni corrected BCa bootstrap  $p \leq .00278$ .

**Table E1e.** Associations between the perception that SRM has a positive impact on humans and nature and the acceptability of SRM among students

| Cluster                  | Sample                   | N     | B         | SE      | 99.737% CI <sup>1</sup> |      | $\beta$ | Model test                    |
|--------------------------|--------------------------|-------|-----------|---------|-------------------------|------|---------|-------------------------------|
|                          |                          |       |           |         | LL                      | UL   |         |                               |
|                          | Overall                  | 4,583 | Constant  | 0.74*** | 0.03                    | 0.65 | 0.84    | n.a.                          |
|                          |                          |       | Predictor | 0.83*** | 0.01                    | 0.80 | 0.86    |                               |
| Global South             | Argentina                | 210   | Constant  | 1.04    | 0.05                    | 0.88 | 1.20    | $R^2=.69, F(1,208)=471.55^*$  |
|                          |                          |       | Predictor | 0.82    | 0.04                    | 0.69 | 0.94    |                               |
|                          | Brazil                   | 210   | Constant  | 0.84    | 0.05                    | 0.68 | 1.00    | $R^2=.71, F(1,208)=506.32^*$  |
|                          |                          |       | Predictor | 0.86    | 0.04                    | 0.74 | 0.99    |                               |
|                          | China                    | 187   | Constant  | 0.55    | 0.05                    | 0.39 | 0.72    | $R^2=.67, F(1,185)=370.32^*$  |
|                          |                          |       | Predictor | 0.88    | 0.05                    | 0.73 | 1.01    |                               |
|                          | Iran <sup>2</sup>        | 193   | Constant  | 0.87    | 0.06                    | 0.70 | 1.06    | $R^2=.46, F(1,191)=161.79^*$  |
|                          |                          |       | Predictor | 0.69    | 0.05                    | 0.52 | 0.84    |                               |
|                          | Nigeria                  | 175   | Constant  | 0.54    | 0.08                    | 0.32 | 0.77    | $R^2=.38, F(1,173)=107.23^*$  |
|                          |                          |       | Predictor | 0.66    | 0.06                    | 0.47 | 0.84    |                               |
| 'Non-WEIRD' Global North | Kazakhstan <sup>2</sup>  | 160   | Constant  | 0.49    | 0.07                    | 0.28 | 0.70    | $R^2=.54, F(1,158)=186.51^*$  |
|                          |                          |       | Predictor | 0.72    | 0.05                    | 0.56 | 0.86    |                               |
|                          | Mexico                   | 208   | Constant  | 0.86    | 0.06                    | 0.67 | 1.07    | $R^2=.59, F(1,206)=293.32^*$  |
|                          |                          |       | Predictor | 0.71    | 0.05                    | 0.57 | 0.84    |                               |
|                          | Russia                   | 217   | Constant  | 0.81    | 0.05                    | 0.66 | 0.96    | $R^2=.70, F(1,215)=492.51^*$  |
|                          |                          |       | Predictor | 0.93    | 0.04                    | 0.80 | 1.06    |                               |
|                          | Taiwan <sup>2</sup>      | 260   | Constant  | 0.78    | 0.04                    | 0.66 | 0.90    | $R^2=.60, F(1,258)=393.03^*$  |
|                          |                          |       | Predictor | 0.81    | 0.04                    | 0.68 | 0.93    |                               |
|                          | Turkey                   | 410   | Constant  | 0.72    | 0.03                    | 0.62 | 0.83    | $R^2=.69, F(1,408)=891.73^*$  |
|                          |                          |       | Predictor | 0.89    | 0.03                    | 0.80 | 0.98    |                               |
| 'WEIRD' Global North     | Australia                | 114   | Constant  | 0.85    | 0.07                    | 0.60 | 1.07    | $R^2=.67, F(1,112)=222.57^*$  |
|                          |                          |       | Predictor | 0.85    | 0.07                    | 0.62 | 1.04    |                               |
|                          | Ireland <sup>2</sup>     | 139   | Constant  | 1.08    | 0.06                    | 0.89 | 1.27    | $R^2=.65, F(1,137)=250.70^*$  |
|                          |                          |       | Predictor | 0.91    | 0.07                    | 0.70 | 1.12    |                               |
|                          | Italy <sup>2</sup>       | 173   | Constant  | 0.29    | 0.07                    | 0.08 | 0.49    | $R^2=.68, F(1,171)=367.59^*$  |
|                          |                          |       | Predictor | 0.96    | 0.04                    | 0.82 | 1.10    |                               |
|                          | Netherlands <sup>2</sup> | 211   | Constant  | 0.90    | 0.05                    | 0.75 | 1.07    | $R^2=.52, F(1,209)=226.17^*$  |
|                          |                          |       | Predictor | 0.87    | 0.06                    | 0.68 | 1.03    |                               |
|                          | Norway <sup>2</sup>      | 441   | Constant  | 0.74    | 0.04                    | 0.63 | 0.85    | $R^2=.59, F(1,439)=620.70^*$  |
|                          |                          |       | Predictor | 0.89    | 0.03                    | 0.79 | 0.98    |                               |
|                          | Spain <sup>2</sup>       | 198   | Constant  | 0.72    | 0.06                    | 0.53 | 0.91    | $R^2=.64, F(1,196)=353.68^*$  |
|                          |                          |       | Predictor | 0.78    | 0.05                    | 0.63 | 0.91    |                               |
|                          | Switzerland <sup>2</sup> | 222   | Constant  | 0.52    | 0.06                    | 0.32 | 0.73    | $R^2=.56, F(1,220)=276.47^*$  |
|                          |                          |       | Predictor | 0.98    | 0.06                    | 0.80 | 1.15    |                               |
|                          | UK <sup>2</sup>          | 194   | Constant  | 0.90    | 0.06                    | 0.70 | 1.08    | $R^2=.47, F(1,192)=171.79^*$  |
|                          |                          |       | Predictor | 0.70    | 0.06                    | 0.53 | 0.87    |                               |
|                          | USA <sup>2</sup>         | 661   | Constant  | 0.79    | 0.03                    | 0.70 | 0.88    | $R^2=.63, F(1,659)=1104.57^*$ |
|                          |                          |       | Predictor | 0.82    | 0.03                    | 0.74 | 0.90    |                               |

*Note.* CI=Confidence interval. LL=Lower level. UL=Upper level. n.a.=not applicable as in generalized estimating equations no omnibus test is run. <sup>1</sup> The Bonferroni corrected CIs are Wald CIs in case of the full sample and BCa bootstrap CIs in case of the country samples. <sup>2</sup> Data were also collected among the general public. \*  $p \leq .05$ . \*\*  $p \leq .01$ . \*\*\*  $p \leq .001$ . \* Significant at the Bonferroni corrected BCa bootstrap  $p \leq .00278$ .

**Table E1f.** Associations between the perception that SRM is inexpensive and the acceptability of SRM among students

| Cluster                     | Sample                   | N     |           | B       | SE   | 99.737% CI <sup>1</sup> |      | $\beta$ | Model test                      |
|-----------------------------|--------------------------|-------|-----------|---------|------|-------------------------|------|---------|---------------------------------|
|                             |                          |       |           |         |      | LL                      | UL   |         |                                 |
| Overall                     |                          | 4,583 | Constant  | 0.75*** | 0.06 | 0.56                    | 0.93 |         | n.a.                            |
|                             |                          |       | Predictor | 0.12*** | 0.01 | 0.09                    | 0.16 | .14     |                                 |
| Global South                | Argentina                | 210   | Constant  | 1.13*   | 0.10 | 0.84                    | 1.42 |         | $R^2 < .01$ , $F(1,208)=0.67$   |
|                             |                          |       | Predictor | 0.05    | 0.06 | -0.13                   | 0.24 | .06     |                                 |
|                             | Brazil                   | 210   | Constant  | 1.05*   | 0.09 | 0.77                    | 1.33 |         | $R^2 = .13$ , $F(1,208)=31.05*$ |
|                             |                          |       | Predictor | 0.29*   | 0.05 | 0.13                    | 0.46 | .36     |                                 |
|                             | China                    | 187   | Constant  | 0.78*   | 0.11 | 0.43                    | 1.08 |         | $R^2 = .01$ , $F(1,185)=1.21$   |
|                             |                          |       | Predictor | 0.07    | 0.06 | -0.13                   | 0.25 | .08     |                                 |
|                             | Iran <sup>2</sup>        | 193   | Constant  | 0.87*   | 0.10 | 0.57                    | 1.17 |         | $R^2 = .02$ , $F(1,191)=3.53$   |
|                             |                          |       | Predictor | 0.12    | 0.06 | -0.08                   | 0.32 | .13     |                                 |
|                             | Nigeria                  | 175   | Constant  | 0.56*   | 0.11 | 0.23                    | 0.89 |         | $R^2 < .01$ , $F(1,173)=0.01$   |
|                             |                          |       | Predictor | 0.00    | 0.05 | -0.15                   | 0.15 | .01     |                                 |
| 'Non-WEIRD'<br>Global North | Kazakhstan <sup>2</sup>  | 160   | Constant  | 0.16    | 0.11 | -0.17                   | 0.49 |         | $R^2 = .03$ , $F(1,158)=4.63$   |
|                             |                          |       | Predictor | 0.13    | 0.07 | -0.06                   | 0.33 | .17     |                                 |
|                             | Mexico                   | 208   | Constant  | 1.18*   | 0.11 | 0.85                    | 1.49 |         | $R^2 < .01$ , $F(1,206)=0.41$   |
|                             |                          |       | Predictor | 0.04    | 0.06 | -0.16                   | 0.24 | .04     |                                 |
|                             | Russia                   | 217   | Constant  | 0.50*   | 0.08 | 0.23                    | 0.73 |         | $R^2 = .05$ , $F(1,215)=11.30*$ |
|                             |                          |       | Predictor | 0.17*   | 0.05 | 0.03                    | 0.32 | .22     |                                 |
|                             | Taiwan <sup>2</sup>      | 260   | Constant  | 0.55*   | 0.07 | 0.32                    | 0.77 |         | $R^2 < .01$ , $F(1,258)=0.19$   |
|                             |                          |       | Predictor | 0.02    | 0.05 | -0.14                   | 0.18 | .03     |                                 |
|                             | Turkey                   | 410   | Constant  | 0.60*   | 0.07 | 0.39                    | 0.81 |         | $R^2 < .01$ , $F(1,408)=1.71$   |
|                             |                          |       | Predictor | 0.06    | 0.04 | -0.08                   | 0.19 | .06     |                                 |
| 'WEIRD'<br>Global North     | Australia                | 114   | Constant  | 1.02*   | 0.12 | 0.65                    | 1.41 |         | $R^2 = .06$ , $F(1,112)=6.97$   |
|                             |                          |       | Predictor | 0.19    | 0.09 | -0.05                   | 0.47 | .24     |                                 |
|                             | Ireland <sup>2</sup>     | 139   | Constant  | 1.00*   | 0.12 | 0.62                    | 1.38 |         | $R^2 = .04$ , $F(1,137)=5.13$   |
|                             |                          |       | Predictor | 0.14    | 0.06 | -0.05                   | 0.31 | .19     |                                 |
|                             | Italy <sup>2</sup>       | 173   | Constant  | 0.49*   | 0.10 | 0.16                    | 0.81 |         | $R^2 = .21$ , $F(1,171)=46.70*$ |
|                             |                          |       | Predictor | 0.43*   | 0.06 | 0.23                    | 0.62 | .46     |                                 |
|                             | Netherlands <sup>2</sup> | 211   | Constant  | 0.63*   | 0.09 | 0.36                    | 0.91 |         | $R^2 < .01$ , $F(1,209)=0.29$   |
|                             |                          |       | Predictor | -0.03   | 0.06 | -0.21                   | 0.14 | -.04    |                                 |
|                             | Norway <sup>2</sup>      | 441   | Constant  | 0.67*   | 0.06 | 0.48                    | 0.84 |         | $R^2 = .04$ , $F(1,439)=16.79*$ |
|                             |                          |       | Predictor | 0.14*   | 0.04 | 0.03                    | 0.24 | .19     |                                 |
|                             | Spain <sup>2</sup>       | 198   | Constant  | 1.03*   | 0.10 | 0.72                    | 1.33 |         | $R^2 = .04$ , $F(1,196)=7.30$   |
|                             |                          |       | Predictor | 0.17    | 0.07 | -0.04                   | 0.37 | .19     |                                 |
|                             | Switzerland <sup>2</sup> | 222   | Constant  | -0.12   | 0.09 | -0.38                   | 0.18 |         | $R^2 < .01$ , $F(1,220)=0.21$   |
|                             |                          |       | Predictor | 0.03    | 0.06 | -0.15                   | 0.21 | .03     |                                 |
|                             | UK <sup>2</sup>          | 194   | Constant  | 1.10*   | 0.08 | 0.85                    | 1.35 |         | $R^2 = .04$ , $F(1,192)=8.83$   |
|                             |                          |       | Predictor | 0.15*   | 0.05 | 0.01                    | 0.29 | .21     |                                 |
|                             | USA <sup>2</sup>         | 661   | Constant  | 0.86*   | 0.05 | 0.71                    | 1.02 |         | $R^2 = .03$ , $F(1,659)=21.20*$ |
|                             |                          |       | Predictor | 0.13*   | 0.03 | 0.03                    | 0.23 | .18     |                                 |

Note. CI=Confidence interval. LL=Lower level. UL=Upper level. n.a.=not applicable as in generalized estimating equations no omnibus test is run. <sup>1</sup> The Bonferroni corrected CIs are Wald CIs in case of the full sample and BCa bootstrap CIs in case of the country samples. <sup>2</sup> Data were also collected among the general public. \*  $p \leq .05$ . \*\*  $p \leq .01$ . \*\*\*  $p \leq .001$ . ‡ Significant at the Bonferroni corrected BCa bootstrap  $p \leq .00278$ .

**Table E1g.** Associations between the perception that SRM affects countries equally and the acceptability of SRM among students

| Cluster                     | Sample                   | N     |           | B       | SE   | 99.737% CI <sup>1</sup> |      | $\beta$ | Model test                  |
|-----------------------------|--------------------------|-------|-----------|---------|------|-------------------------|------|---------|-----------------------------|
|                             |                          |       |           |         |      | LL                      | UL   |         |                             |
| Overall                     |                          | 4,583 | Constant  | 1.06*** | 0.06 | 0.89                    | 1.23 |         | n.a.                        |
|                             |                          |       | Predictor | 0.36*** | 0.01 | 0.33                    | 0.40 | .40     |                             |
| Global South                | Argentina                | 210   | Constant  | 1.58*   | 0.10 | 1.23                    | 1.87 |         | $R^2=.12, F(1,208)=27.43*$  |
|                             |                          |       | Predictor | 0.31*   | 0.05 | 0.15                    | 0.47 | .34     |                             |
|                             | Brazil                   | 210   | Constant  | 1.54*   | 0.10 | 1.20                    | 1.85 |         | $R^2=.25, F(1,208)=70.10*$  |
|                             |                          |       | Predictor | 0.48*   | 0.06 | 0.28                    | 0.66 | .50     |                             |
|                             | China                    | 187   | Constant  | 0.99*   | 0.07 | 0.80                    | 1.19 |         | $R^2=.23, F(1,185)=56.64*$  |
|                             |                          |       | Predictor | 0.40*   | 0.05 | 0.24                    | 0.56 | .48     |                             |
|                             | Iran <sup>2</sup>        | 193   | Constant  | 1.12*   | 0.09 | 0.81                    | 1.39 |         | $R^2=.15, F(1,191)=33.31*$  |
|                             |                          |       | Predictor | 0.32*   | 0.06 | 0.15                    | 0.50 | .39     |                             |
|                             | Nigeria                  | 175   | Constant  | 0.65*   | 0.10 | 0.36                    | 0.93 |         | $R^2=.05, F(1,173)=8.79*$   |
|                             |                          |       | Predictor | 0.18    | 0.06 | -0.01                   | 0.36 | .22     |                             |
| 'Non-WEIRD'<br>Global North | Kazakhstan <sup>2</sup>  | 160   | Constant  | 0.29*   | 0.09 | 0.00                    | 0.53 |         | $R^2=.28, F(1,158)=60.47*$  |
|                             |                          |       | Predictor | 0.42*   | 0.05 | 0.26                    | 0.56 | .53     |                             |
|                             | Mexico                   | 208   | Constant  | 1.23*   | 0.08 | 1.00                    | 1.46 |         | $R^2=.17, F(1,206)=41.63*$  |
|                             |                          |       | Predictor | 0.30*   | 0.05 | 0.16                    | 0.44 | .41     |                             |
|                             | Russia                   | 217   | Constant  | 0.93*   | 0.10 | 0.60                    | 1.25 |         | $R^2=.15, F(1,215)=37.36*$  |
|                             |                          |       | Predictor | 0.36*   | 0.05 | 0.20                    | 0.53 | .38     |                             |
|                             | Taiwan <sup>2</sup>      | 260   | Constant  | 0.95*   | 0.07 | 0.70                    | 1.19 |         | $R^2=.18, F(1,258)=55.34*$  |
|                             |                          |       | Predictor | 0.34*   | 0.05 | 0.20                    | 0.50 | .42     |                             |
|                             | Turkey                   | 410   | Constant  | 1.11*   | 0.09 | 0.84                    | 1.39 |         | $R^2=.11, F(1,408)=52.42*$  |
|                             |                          |       | Predictor | 0.34*   | 0.05 | 0.19                    | 0.48 | .34     |                             |
| 'WEIRD'<br>Global North     | Australia                | 114   | Constant  | 1.13*   | 0.12 | 0.73                    | 1.47 |         | $R^2=.16, F(1,112)=21.21*$  |
|                             |                          |       | Predictor | 0.35*   | 0.08 | 0.10                    | 0.58 | .40     |                             |
|                             | Ireland <sup>2</sup>     | 139   | Constant  | 1.50*   | 0.12 | 1.14                    | 1.92 |         | $R^2=.19, F(1,137)=32.28*$  |
|                             |                          |       | Predictor | 0.42*   | 0.07 | 0.22                    | 0.64 | .44     |                             |
|                             | Italy <sup>2</sup>       | 173   | Constant  | 0.99*   | 0.11 | 0.65                    | 1.34 |         | $R^2=.26, F(1,171)=59.29*$  |
|                             |                          |       | Predictor | 0.51*   | 0.06 | 0.33                    | 0.70 | .51     |                             |
|                             | Netherlands <sup>2</sup> | 211   | Constant  | 1.07*   | 0.12 | 0.66                    | 1.47 |         | $R^2=.07, F(1,209)=16.30*$  |
|                             |                          |       | Predictor | 0.27*   | 0.07 | 0.07                    | 0.49 | .27     |                             |
|                             | Norway <sup>2</sup>      | 441   | Constant  | 1.20*   | 0.08 | 0.92                    | 1.43 |         | $R^2=.13, F(1,439)=63.65*$  |
|                             |                          |       | Predictor | 0.36*   | 0.04 | 0.23                    | 0.50 | .36     |                             |
|                             | Spain <sup>2</sup>       | 198   | Constant  | 1.25*   | 0.08 | 0.98                    | 1.48 |         | $R^2=.22, F(1,196)=54.42*$  |
|                             |                          |       | Predictor | 0.39*   | 0.05 | 0.23                    | 0.53 | .47     |                             |
|                             | Switzerland <sup>2</sup> | 222   | Constant  | 0.71*   | 0.15 | 0.23                    | 1.17 |         | $R^2=.20, F(1,220)=56.20*$  |
|                             |                          |       | Predictor | 0.49*   | 0.07 | 0.25                    | 0.71 | .45     |                             |
|                             | UK <sup>2</sup>          | 194   | Constant  | 1.17*   | 0.08 | 0.91                    | 1.42 |         | $R^2=.11, F(1,192)=24.89*$  |
|                             |                          |       | Predictor | 0.29*   | 0.06 | 0.11                    | 0.47 | .34     |                             |
|                             | USA <sup>2</sup>         | 661   | Constant  | 0.98*   | 0.04 | 0.86                    | 1.11 |         | $R^2=.21, F(1,659)=171.21*$ |
|                             |                          |       | Predictor | 0.38*   | 0.03 | 0.29                    | 0.47 | .45     |                             |

*Note.* CI=Confidence interval. LL=Lower level. UL=Upper level. n.a.=not applicable as in generalized estimating equations no omnibus test is run. <sup>1</sup> The Bonferroni corrected CIs are Wald CIs in case of the full sample and BCa bootstrap CIs in case of the country samples. <sup>2</sup> Data were also collected among the general public. \*  $p \leq .05$ . \*\*  $p \leq .01$ . \*\*\*  $p \leq .001$ . \* Significant at the Bonferroni corrected BCa bootstrap  $p \leq .00278$ .



**Table E2a.** Associations between the belief in global warming and the perception that SRM limits global warming with acceptability of SRM among the general public

| Cluster                  | Sample                | N     | Belief in global warming |         |                         |       |         |            | SRM limits global warming  |         |                         |       |         |            |                             |
|--------------------------|-----------------------|-------|--------------------------|---------|-------------------------|-------|---------|------------|----------------------------|---------|-------------------------|-------|---------|------------|-----------------------------|
|                          |                       |       | B                        | SE      | 99.583% CI <sup>1</sup> |       | $\beta$ | Model test | B                          | SE      | 99.583% CI <sup>1</sup> |       | $\beta$ | Model test |                             |
|                          |                       |       |                          |         | LL                      | UL    |         |            |                            |         | LL                      | UL    |         |            |                             |
|                          | Full sample           | 2,248 | Constant                 | -0.24*  | 0.10                    | -0.52 | 0.03    |            | n.a.                       | 0.00    | 0.05                    | -0.15 | 0.16    |            | n.a.                        |
|                          |                       |       | Predictor                | 0.27*** | 0.03                    | 0.19  | 0.35    | .17        |                            | 0.59*** | 0.02                    | 0.54  | 0.63    | .61        |                             |
| Global South             | Iran                  | 170   | Constant                 | 0.63*   | 0.19                    | 0.07  | 1.19    |            | $R^2=.01, F(1,168)=1.87$   | 0.43*   | 0.14                    | 0.01  | 0.84    |            | $R^2=.20, F(1,168)=41.00*$  |
|                          |                       |       | Predictor                | 0.15    | 0.10                    | -0.16 | 0.47    | .11        |                            | 0.41*   | 0.08                    | 0.18  | 0.66    | .44        |                             |
| 'Non-WEIRD' Global North | Kazakhstan            | 141   | Constant                 | -0.29   | 0.20                    | -0.89 | 0.32    |            | $R^2<.01, F(1,139)=0.12$   | -0.14   | 0.09                    | -0.39 | 0.11    |            | $R^2=.37, F(1,139)=82.42*$  |
|                          |                       |       | Predictor                | 0.04    | 0.12                    | -0.30 | 0.38    | .03        |                            | 0.47*   | 0.05                    | 0.31  | 0.64    | .61        |                             |
|                          | Taiwan                | 232   | Constant                 | 0.37    | 0.29                    | -0.49 | 1.21    |            | $R^2<.01, F(1,230)=0.07$   | 0.04    | 0.09                    | -0.22 | 0.31    |            | $R^2=.37, F(1,230)=135.82*$ |
|                          |                       |       | Predictor                | 0.04    | 0.13                    | -0.33 | 0.41    | .02        |                            | 0.62*   | 0.06                    | 0.46  | 0.77    | .61        |                             |
| 'WEIRD' Global North     | Ireland               | 191   | Constant                 | -0.03   | 0.24                    | -0.85 | 0.72    |            | $R^2=.01, F(1,189)=2.29$   | -0.06   | 0.09                    | -0.31 | 0.19    |            | $R^2=.42, F(1,189)=135.78*$ |
|                          |                       |       | Predictor                | 0.17    | 0.10                    | -0.13 | 0.47    | .11        |                            | 0.62*   | 0.05                    | 0.45  | 0.78    | .65        |                             |
|                          | Italy                 | 168   | Constant                 | -0.44   | 0.27                    | -1.02 | 0.62    |            | $R^2=.04, F(1,166)=6.99$   | 0.04    | 0.09                    | -0.24 | 0.29    |            | $R^2=.46, F(1,166)=141.13*$ |
|                          |                       |       | Predictor                | 0.26    | 0.12                    | -0.19 | 0.51    | .20        |                            | 0.61*   | 0.05                    | 0.45  | 0.75    | .68        |                             |
|                          | Netherlands           | 262   | Constant                 | -0.43   | 0.16                    | -0.86 | 0.06    |            | $R^2=.04, F(1,260)=12.11*$ | -0.21*  | 0.07                    | -0.42 | 0.01    |            | $R^2=.41, F(1,260)=181.90*$ |
|                          |                       |       | Predictor                | 0.26*   | 0.09                    | -0.02 | 0.49    | .21        |                            | 0.59*   | 0.05                    | 0.42  | 0.72    | .64        |                             |
|                          | Norway                | 207   | Constant                 | -0.16   | 0.31                    | -1.12 | 0.71    |            | $R^2=.02, F(1,205)=4.21$   | 0.01    | 0.09                    | -0.25 | 0.27    |            | $R^2=.25, F(1,205)=67.59*$  |
|                          |                       |       | Predictor                | 0.18    | 0.12                    | -0.15 | 0.58    | .14        |                            | 0.44*   | 0.05                    | 0.28  | 0.59    | .50        |                             |
|                          | Portugal <sup>2</sup> | 167   | Constant                 | -0.38   | 0.24                    | -1.17 | 0.36    |            | $R^2=.07, F(1,165)=12.73*$ | 0.21    | 0.10                    | -0.06 | 0.51    |            | $R^2=.43, F(1,165)=126.62*$ |
|                          |                       |       | Predictor                | 0.49*   | 0.12                    | 0.15  | 0.82    | .27        |                            | 0.68*   | 0.07                    | 0.43  | 0.85    | .66        |                             |
|                          | Spain                 | 195   | Constant                 | -0.09   | 0.34                    | -1.02 | 1.08    |            | $R^2=.02, F(1,193)=3.54$   | 0.22    | 0.09                    | -0.06 | 0.48    |            | $R^2=.38, F(1,193)=117.88*$ |
|                          |                       |       | Predictor                | 0.30    | 0.14                    | -0.16 | 0.66    | .13        |                            | 0.61*   | 0.06                    | 0.44  | 0.77    | .62        |                             |
|                          | Switzerland           | 96    | Constant                 | -0.70   | 0.37                    | -1.66 | 0.54    |            | $R^2=.01, F(1,94)=0.99$    | -0.64*  | 0.14                    | -1.01 | -0.25   |            | $R^2=.37, F(1,94)=54.54*$   |
|                          |                       |       | Predictor                | 0.16    | 0.17                    | -0.40 | 0.54    | .10        |                            | 0.68*   | 0.08                    | 0.41  | 0.91    | .61        |                             |
|                          | UK                    | 187   | Constant                 | -0.36   | 0.19                    | -0.88 | 0.27    |            | $R^2=.12, F(1,185)=25.88*$ | 0.21    | 0.10                    | -0.07 | 0.51    |            | $R^2=.37, F(1,185)=107.42*$ |
|                          |                       |       | Predictor                | 0.46*   | 0.09                    | 0.18  | 0.70    | .35        |                            | 0.60*   | 0.07                    | 0.39  | 0.77    | .61        |                             |
|                          | USA                   | 232   | Constant                 | -0.36   | 0.13                    | -0.71 | 0.00    |            | $R^2=.10, F(1,230)=25.99*$ | -0.12   | 0.08                    | -0.36 | 0.11    |            | $R^2=.43, F(1,230)=170.99*$ |
|                          |                       |       | Predictor                | 0.37*   | 0.07                    | 0.15  | 0.57    | .32        |                            | 0.68*   | 0.05                    | 0.53  | 0.82    | .65        |                             |

Note. CI=Confidence interval. LL=Lower level. UL=Upper level. n.a.=not applicable as in generalized estimating equations no omnibus test is run. <sup>1</sup> The Bonferroni corrected CIs are Wald CIs in case of the full sample and BCa bootstrap CIs in case of the country samples. <sup>2</sup> Data were collected among the general public only. \*  $p \leq .05$ . \*\*  $p \leq .01$ . \*\*\*  $p \leq .001$ . \* Significant at the Bonferroni corrected BCa bootstrap  $p \leq .0045$ .

**Table E2b.** Associations between the perceptions that SRM addresses the causes of global warming and that SRM increases the efforts to mitigate global warming with acceptability of SRM among the general public

| Cluster                  | Sample                | N     | SRM addresses the causes of global warming |         |                         |       |         |            | SRM increases mitigation efforts |         |                         |       |         |            |                             |
|--------------------------|-----------------------|-------|--------------------------------------------|---------|-------------------------|-------|---------|------------|----------------------------------|---------|-------------------------|-------|---------|------------|-----------------------------|
|                          |                       |       | B                                          | SE      | 99.583% CI <sup>1</sup> |       | $\beta$ | Model test | B                                | SE      | 99.583% CI <sup>1</sup> |       | $\beta$ | Model test |                             |
|                          |                       |       |                                            |         | LL                      | UL    |         |            |                                  |         | LL                      | UL    |         |            |                             |
|                          | Full sample           | 2,248 | Constant                                   | 0.45*** | 0.09                    | 0.20  | 0.70    |            | n.a.                             | 0.62*** | 0.08                    | 0.39  | 0.86    |            | n.a.                        |
|                          |                       |       | Predictor                                  | 0.43*** | 0.02                    | 0.38  | 0.47    | .50        |                                  | 0.46*** | 0.02                    | 0.40  | 0.51    | .46        |                             |
| Global South             | Iran                  | 170   | Constant                                   | 0.27    | 0.20                    | -0.33 | 0.87    |            | $R^2=.08, F(1,168)=14.49*$       | 0.97*   | 0.10                    | 0.69  | 1.25    |            | $R^2=.08, F(1,168)=15.07*$  |
|                          |                       |       | Predictor                                  | 0.32*   | 0.09                    | 0.06  | 0.58    | .28        |                                  | 0.23*   | 0.06                    | 0.07  | 0.38    | .29        |                             |
| 'Non-WEIRD' Global North | Kazakhstan            | 141   | Constant                                   | -0.20   | 0.11                    | -0.53 | 0.11    |            | $R^2=.15, F(1,139)=25.01*$       | 0.09    | 0.13                    | -0.31 | 0.46    |            | $R^2=.19, F(1,139)=33.01*$  |
|                          |                       |       | Predictor                                  | 0.31*   | 0.07                    | 0.11  | 0.53    | .39        |                                  | 0.43*   | 0.09                    | 0.17  | 0.68    | .44        |                             |
|                          | Taiwan                | 232   | Constant                                   | 0.72*   | 0.07                    | 0.50  | 0.92    |            | $R^2=.27, F(1,230)=86.24*$       | 0.65*   | 0.07                    | 0.44  | 0.86    |            | $R^2=.34, F(1,230)=120.60*$ |
|                          |                       |       | Predictor                                  | 0.39*   | 0.04                    | 0.26  | 0.50    | .52        |                                  | 0.54*   | 0.05                    | 0.40  | 0.67    | .59        |                             |
| 'WEIRD' Global North     | Ireland               | 191   | Constant                                   | 0.79*   | 0.11                    | 0.45  | 1.12    |            | $R^2=.18, F(1,189)=40.14*$       | 0.89*   | 0.11                    | 0.57  | 1.22    |            | $R^2=.20, F(1,189)=48.28*$  |
|                          |                       |       | Predictor                                  | 0.37*   | 0.06                    | 0.21  | 0.52    | .42        |                                  | 0.48*   | 0.06                    | 0.31  | 0.67    | .45        |                             |
|                          | Italy                 | 168   | Constant                                   | 0.16    | 0.09                    | -0.10 | 0.40    |            | $R^2=.42, F(1,166)=120.62*$      | 0.40*   | 0.10                    | 0.09  | 0.70    |            | $R^2=.34, F(1,166)=85.50*$  |
|                          |                       |       | Predictor                                  | 0.50*   | 0.04                    | 0.37  | 0.62    | .65        |                                  | 0.51*   | 0.06                    | 0.34  | 0.67    | .58        |                             |
|                          | Netherlands           | 262   | Constant                                   | 0.35*   | 0.09                    | 0.10  | 0.60    |            | $R^2=.21, F(1,260)=67.15*$       | 0.44*   | 0.10                    | 0.12  | 0.72    |            | $R^2=.15, F(1,260)=45.13*$  |
|                          |                       |       | Predictor                                  | 0.40*   | 0.05                    | 0.24  | 0.55    | .45        |                                  | 0.39*   | 0.06                    | 0.20  | 0.55    | .38        |                             |
|                          | Norway                | 207   | Constant                                   | 0.83*   | 0.09                    | 0.57  | 1.07    |            | $R^2=.24, F(1,205)=65.59*$       | 0.81*   | 0.14                    | 0.37  | 1.23    |            | $R^2=.11, F(1,205)=24.13*$  |
|                          |                       |       | Predictor                                  | 0.41*   | 0.05                    | 0.28  | 0.54    | .49        |                                  | 0.35*   | 0.07                    | 0.13  | 0.56    | .32        |                             |
|                          | Portugal <sup>2</sup> | 167   | Constant                                   | 0.78*   | 0.09                    | 0.52  | 1.03    |            | $R^2=.23, F(1,165)=49.43*$       | 0.80*   | 0.10                    | 0.51  | 1.05    |            | $R^2=.20, F(1,165)=40.23*$  |
|                          |                       |       | Predictor                                  | 0.36*   | 0.06                    | 0.20  | 0.51    | .48        |                                  | 0.38*   | 0.06                    | 0.18  | 0.53    | .44        |                             |
|                          | Spain                 | 195   | Constant                                   | 0.58*   | 0.09                    | 0.30  | 0.82    |            | $R^2=.38, F(1,193)=117.33*$      | 0.94*   | 0.09                    | 0.69  | 1.20    |            | $R^2=.31, F(1,193)=88.55*$  |
|                          |                       |       | Predictor                                  | 0.49*   | 0.05                    | 0.33  | 0.63    | .61        |                                  | 0.49*   | 0.05                    | 0.33  | 0.64    | .56        |                             |
|                          | Switzerland           | 96    | Constant                                   | 0.65*   | 0.16                    | 0.15  | 1.12    |            | $R^2=.34, F(1,94)=48.84*$        | 0.70*   | 0.19                    | 0.13  | 1.27    |            | $R^2=.31, F(1,94)=42.34*$   |
|                          |                       |       | Predictor                                  | 0.63*   | 0.07                    | 0.41  | 0.82    | .58        |                                  | 0.70*   | 0.09                    | 0.42  | 0.99    | .56        |                             |
|                          | UK                    | 187   | Constant                                   | 0.56*   | 0.09                    | 0.31  | 0.80    |            | $R^2=.30, F(1,185)=79.48*$       | 0.57*   | 0.09                    | 0.32  | 0.81    |            | $R^2=.30, F(1,185)=77.95*$  |
|                          |                       |       | Predictor                                  | 0.48*   | 0.06                    | 0.30  | 0.64    | .55        |                                  | 0.56*   | 0.07                    | 0.34  | 0.73    | .54        |                             |
|                          | USA                   | 232   | Constant                                   | 0.25*   | 0.09                    | -0.01 | 0.52    |            | $R^2=.30, F(1,230)=97.47*$       | 0.30*   | 0.09                    | 0.02  | 0.57    |            | $R^2=.21, F(1,230)=60.40*$  |
|                          |                       |       | Predictor                                  | 0.51*   | 0.06                    | 0.34  | 0.66    | .55        |                                  | 0.52*   | 0.07                    | 0.32  | 0.71    | .46        |                             |

Note. CI=Confidence interval. LL=Lower level. UL=Upper level. n.a.=not applicable as in generalized estimating equations no omnibus test is run. <sup>1</sup> The Bonferroni corrected CIs are Wald CIs in case of the full sample and BCa bootstrap CIs in case of the country samples. <sup>2</sup> Data were collected among the general public only. \*  $p \leq .05$ . \*\*  $p \leq .01$ . \*\*\*  $p \leq .001$ . \* Significant at the Bonferroni corrected BCa bootstrap  $p \leq .0045$ .

**Table E2c.** Associations between the perceptions that SRM has a positive impact on humans and nature and that SRM is inexpensive with acceptability of SRM among the general public

| Cluster                  | Sample                | N     | SRM is positive for humans and nature |         |                         |      |         |            | SRM is inexpensive         |         |                         |       |         |            |                            |
|--------------------------|-----------------------|-------|---------------------------------------|---------|-------------------------|------|---------|------------|----------------------------|---------|-------------------------|-------|---------|------------|----------------------------|
|                          |                       |       | B                                     | SE      | 99.583% CI <sup>1</sup> |      | $\beta$ | Model test | B                          | SE      | 99.583% CI <sup>1</sup> |       | $\beta$ | Model test |                            |
|                          |                       |       |                                       |         | LL                      | UL   |         |            |                            |         | LL                      | UL    |         |            |                            |
|                          | Full sample           | 2,248 | Constant                              | 0.53*** | 0.04                    | 0.40 | 0.66    |            | n.a.                       | 0.50*** | 0.08                    | 0.26  | 0.74    |            | n.a.                       |
|                          |                       |       | Predictor                             | 0.90*** | 0.01                    | 0.86 | 0.94    | .82        |                            | 0.27*** | 0.02                    | 0.22  | 0.33    | .29        |                            |
| Global South             | Iran                  | 170   | Constant                              | 0.80*   | 0.07                    | 0.57 | 1.02    |            | $R^2=.52,$                 | 1.00*   | 0.12                    | 0.66  | 1.35    |            | $R^2=.03, F(1,168)=4.65$   |
|                          |                       |       | Predictor                             | 0.76*   | 0.07                    | 0.56 | 0.94    | .72        | $F(1,168)=180.49*$         | 0.16    | 0.07                    | -0.08 | 0.35    | 0.16       |                            |
| 'Non-WEIRD' Global North | Kazakhstan            | 141   | Constant                              | 0.29*   | 0.10                    | 0.01 | 0.59    |            | $R^2=.52,$                 | 0.19    | 0.12                    | -0.18 | 0.53    |            | $R^2=.09, F(1,139)=14.33*$ |
|                          |                       |       | Predictor                             | 0.74*   | 0.06                    | 0.56 | 0.92    | .72        | $F(1,139)=150.96*$         | 0.28*   | 0.06                    | 0.09  | 0.45    | 0.31       |                            |
|                          | Taiwan                | 232   | Constant                              | 0.52*   | 0.04                    | 0.39 | 0.64    |            | $R^2=.75,$                 | 0.68*   | 0.08                    | 0.43  | 0.92    |            | $R^2=.10, F(1,230)=24.15*$ |
|                          |                       |       | Predictor                             | 0.83*   | 0.03                    | 0.73 | 0.92    | .87        | $F(1,230)=688.67*$         | 0.28*   | 0.06                    | 0.12  | 0.44    | 0.31       |                            |
| 'WEIRD' Global North     | Ireland               | 191   | Constant                              | 0.73*   | 0.06                    | 0.57 | 0.90    |            | $R^2=.70,$                 | 0.46*   | 0.12                    | 0.14  | 0.83    |            | $R^2=.04, F(1,189)=7.46$   |
|                          |                       |       | Predictor                             | 0.95*   | 0.05                    | 0.82 | 1.08    | .84        | $F(1,189)=446.73*$         | 0.16    | 0.06                    | -0.02 | 0.35    | 0.19       |                            |
|                          | Italy                 | 168   | Constant                              | 0.21*   | 0.06                    | 0.02 | 0.38    |            | $R^2=.72,$                 | 0.24    | 0.11                    | -0.08 | 0.58    |            | $R^2=.13, F(1,166)=24.98*$ |
|                          |                       |       | Predictor                             | 0.92*   | 0.04                    | 0.81 | 1.02    | .85        | $F(1,166)=418.61*$         | 0.33*   | 0.07                    | 0.12  | 0.51    | 0.36       |                            |
|                          | Netherlands           | 262   | Constant                              | 0.68*   | 0.06                    | 0.53 | 0.86    |            | $R^2=.66.41,$              | 0.26    | 0.11                    | -0.04 | 0.57    |            | $R^2=.06, F(1,260)=16.53*$ |
|                          |                       |       | Predictor                             | 0.98*   | 0.04                    | 0.87 | 1.10    | .81        | $F(1,260)=496.35*$         | 0.25*   | 0.06                    | 0.07  | 0.43    | 0.24       |                            |
|                          | Norway                | 207   | Constant                              | 0.62*   | 0.05                    | 0.46 | 0.77    |            | $R^2=.71,$                 | 0.34*   | 0.09                    | 0.07  | 0.59    |            | $R^2=.05, F(1,205)=10.93*$ |
|                          |                       |       | Predictor                             | 0.99*   | 0.04                    | 0.87 | 1.11    | .84        | $F(1,205)=503.22*$         | 0.18*   | 0.05                    | 0.03  | 0.33    | 0.22       |                            |
|                          | Portugal <sup>2</sup> | 167   | Constant                              | 0.64*   | 0.06                    | 0.46 | 0.83    |            | $R^2=.65,$                 | 0.90*   | 0.10                    | 0.60  | 1.19    |            | $R^2=.15, F(1,165)=28.56*$ |
|                          |                       |       | Predictor                             | 0.82*   | 0.05                    | 0.68 | 0.93    | .81        | $F(1,165)=312.07*$         | 0.33*   | 0.06                    | 0.13  | 0.51    | 0.38       |                            |
|                          | Spain                 | 195   | Constant                              | 0.64*   | 0.06                    | 0.44 | 0.84    |            | $R^2=.65,$                 | 0.87*   | 0.11                    | 0.54  | 1.18    |            | $R^2=.09, F(1,193)=19.38*$ |
|                          |                       |       | Predictor                             | 0.82*   | 0.04                    | 0.71 | 0.93    | .80        | $F(1,193)=352.84*$         | 0.30*   | 0.06                    | 0.11  | 0.46    | 0.30       |                            |
|                          | Switzerland           | 96    | Constant                              | 0.50*   | 0.09                    | 0.23 | 0.77    |            | $R^2=.79, F(1,94)=345.59*$ | -0.13   | 0.19                    | -0.69 | 0.40    |            | $R^2=.12, F(1,94)=13.42*$  |
|                          |                       |       | Predictor                             | 1.14*   | 0.05                    | 0.99 | 1.30    | .89        |                            | 0.40*   | 0.11                    | 0.04  | 0.70    | 0.35       |                            |
|                          | UK                    | 187   | Constant                              | 0.56*   | 0.07                    | 0.35 | 0.76    |            | $R^2=.65,$                 | 0.67*   | 0.11                    | 0.32  | 0.99    |            | $R^2=.09, F(1,185)=17.31*$ |
|                          |                       |       | Predictor                             | 0.93*   | 0.06                    | 0.75 | 1.09    | .81        | $F(1,185)=343.52*$         | 0.26*   | 0.07                    | 0.07  | 0.45    | 0.29       |                            |
|                          | USA                   | 232   | Constant                              | 0.35*   | 0.06                    | 0.19 | 0.51    |            | $R^2=.74,$                 | 0.43*   | 0.11                    | 0.09  | 0.76    |            | $R^2=.16, F(1,230)=44.08*$ |
|                          |                       |       | Predictor                             | 0.94*   | 0.03                    | 0.85 | 1.03    | .86        | $F(1,230)=647.09*$         | 0.37*   | 0.06                    | 0.19  | 0.54    | 0.40       |                            |

Note. CI=Confidence interval. LL=Lower level. UL=Upper level. n.a.=not applicable as in generalized estimating equations no omnibus test is run. <sup>1</sup> The Bonferroni corrected CIs are Wald CIs in case of the full sample and BCa bootstrap CIs in case of the country samples. <sup>2</sup> Data were collected among the general public only. \*  $p \leq .05$ . \*\*  $p \leq .01$ . \*\*\*  $p \leq .001$ . \* Significant at the Bonferroni corrected BCa bootstrap  $p \leq .0045$ .

**Table E2d.** Associations between the perception that SRM affects countries equally and the acceptability of SRM among the general public

|                             | Sample                | N     |           | B       | SE   | 99.583% CI <sup>1</sup> |      | $\beta$ | Model test                  |
|-----------------------------|-----------------------|-------|-----------|---------|------|-------------------------|------|---------|-----------------------------|
|                             |                       |       |           |         |      | LL                      | UL   |         |                             |
| Cluster                     | Full sample           | 2,248 | Constant  | 0.80*** | 0.10 | 0.53                    | 1.07 |         | n.a.                        |
|                             |                       |       | Predictor | 0.49*** | 0.02 | 0.44                    | 0.54 | .50     |                             |
| Global South                | Iran                  | 170   | Constant  | 1.31*   | 0.10 | 1.02                    | 1.61 |         | $R^2=.24, F(1,168)=53.88*$  |
|                             |                       |       | Predictor | 0.42*   | 0.06 | 0.24                    | 0.60 | 0.49    |                             |
| 'Non-WEIRD'<br>Global North | Kazakhstan            | 141   | Constant  | 0.22    | 0.10 | -0.07                   | 0.53 |         | $R^2=.33, F(1,139)=67.52*$  |
|                             |                       |       | Predictor | 0.49*   | 0.06 | 0.31                    | 0.65 | 0.57    |                             |
|                             | Taiwan                | 232   | Constant  | 1.00*   | 0.07 | 0.78                    | 1.20 |         | $R^2=.32, F(1,230)=109.24*$ |
|                             |                       |       | Predictor | 0.51*   | 0.05 | 0.38                    | 0.65 | 0.57    |                             |
| 'WEIRD'<br>Global North     | Ireland               | 191   | Constant  | 1.13*   | 0.11 | 0.80                    | 1.47 |         | $R^2=.22, F(1,189)=52.77*$  |
|                             |                       |       | Predictor | 0.52*   | 0.06 | 0.34                    | 0.72 | 0.47    |                             |
|                             | Italy                 | 168   | Constant  | 0.78*   | 0.08 | 0.54                    | 1.04 |         | $R^2=.43, F(1,166)=127.63*$ |
|                             |                       |       | Predictor | 0.60*   | 0.04 | 0.48                    | 0.73 | 0.66    |                             |
|                             | Netherlands           | 262   | Constant  | 0.61*   | 0.10 | 0.32                    | 0.88 |         | $R^2=.25, F(1,260)=84.82*$  |
|                             |                       |       | Predictor | 0.52*   | 0.05 | 0.36                    | 0.67 | 0.50    |                             |
|                             | Norway                | 207   | Constant  | 0.86*   | 0.15 | 0.44                    | 1.32 |         | $R^2=.10, F(1,205)=23.09*$  |
|                             |                       |       | Predictor | 0.35*   | 0.07 | 0.14                    | 0.56 | 0.32    |                             |
|                             | Portugal <sup>2</sup> | 167   | Constant  | 1.03*   | 0.09 | 0.77                    | 1.29 |         | $R^2=.23, F(1,165)=50.29*$  |
|                             |                       |       | Predictor | 0.44*   | 0.06 | 0.25                    | 0.60 | 0.48    |                             |
|                             | Spain                 | 195   | Constant  | 1.04*   | 0.11 | 0.69                    | 1.35 |         | $R^2=.23, F(1,193)=58.84*$  |
|                             |                       |       | Predictor | 0.40*   | 0.06 | 0.22                    | 0.56 | 0.48    |                             |
|                             | Switzerland           | 96    | Constant  | 0.49    | 0.29 | -0.40                   | 1.41 |         | $R^2=.24, F(1,94)=29.70*$   |
|                             |                       |       | Predictor | 0.59*   | 0.13 | 0.20                    | 1.00 | 0.49    |                             |
|                             | UK                    | 187   | Constant  | 0.65*   | 0.09 | 0.39                    | 0.92 |         | $R^2=.23, F(1,185)=56.48*$  |
|                             |                       |       | Predictor | 0.46*   | 0.07 | 0.27                    | 0.64 | 0.48    |                             |
|                             | USA                   | 232   | Constant  | 0.46*   | 0.09 | 0.19                    | 0.72 |         | $R^2=.31, F(1,230)=105.46*$ |
|                             |                       |       | Predictor | 0.57*   | 0.05 | 0.43                    | 0.71 | 0.56    |                             |

Note. CI=Confidence interval. LL=Lower level. UL=Upper level. n.a.=not applicable as in generalized estimating equations no omnibus test is run. <sup>1</sup> The Bonferroni corrected CIs are Wald CIs in case of the full sample and BCa bootstrap CIs in case of the country samples. <sup>2</sup> Data were collected among the general public only. \*  $p \leq .05$ . \*\*  $p \leq .01$ . \*\*\*  $p \leq .001$ . \* Significant at the Bonferroni corrected BCa bootstrap  $p \leq .0045$ .

**Table E3a.** Associations between belief in global warming and perceptions about SRM with acceptability of SRM among students in the Global South, the ‘Non-WEIRD’ Global North, and the ‘WEIRD’ Global North

|                                        | Global South ( <i>N</i> =975) |           |                              |      | ‘Non-WEIRD’ Global North ( <i>N</i> =1,255) |          |           |                              |      | ‘WEIRD’ Global North ( <i>N</i> =2,353) |          |           |                              |      |         |
|----------------------------------------|-------------------------------|-----------|------------------------------|------|---------------------------------------------|----------|-----------|------------------------------|------|-----------------------------------------|----------|-----------|------------------------------|------|---------|
|                                        | <i>B</i>                      | <i>SE</i> | 99.667% Wald CI <sup>1</sup> |      | $\beta$                                     | <i>B</i> | <i>SE</i> | 99.667% Wald CI <sup>1</sup> |      | $\beta$                                 | <i>B</i> | <i>SE</i> | 99.667% Wald CI <sup>1</sup> |      | $\beta$ |
|                                        |                               |           | LL                           | UL   |                                             |          |           | LL                           | UL   |                                         |          |           | LL                           | UL   |         |
| Constant                               | 0.27***                       | 0.08      | 0.11                         | 0.43 |                                             | 0.07     | 0.12      | -0.19                        | 0.33 |                                         | 0.11     | 0.11      | -0.13                        | 0.34 |         |
| Belief in global warming               | 0.28***                       | 0.04      | 0.20                         | 0.36 | .16                                         | 0.24***  | 0.04      | 0.16                         | 0.33 | .14                                     | 0.23***  | 0.03      | 0.17                         | 0.30 | .14     |
| Constant                               | 0.38***                       | 0.07      | 0.24                         | 0.53 |                                             | 0.20***  | 0.10      | -0.01                        | 0.41 |                                         | 0.17*    | 0.08      | 0.00                         | 0.34 |         |
| SRM limits global warming              | 0.52***                       | 0.02      | 0.47                         | 0.57 | .59                                         | 0.52***  | 0.02      | 0.48                         | 0.56 | .60                                     | 0.56***  | 0.02      | 0.53                         | 0.59 | .60     |
| Constant                               | 0.76***                       | 0.14      | 0.45                         | 1.06 |                                             | 0.55***  | 0.11      | 0.31                         | 0.79 |                                         | 0.82***  | 0.06      | 0.69                         | 0.96 |         |
| SRM addresses causes of global warming | 0.29***                       | 0.02      | 0.25                         | 0.34 | .40                                         | 0.33***  | 0.02      | 0.29                         | 0.37 | .46                                     | 0.35***  | 0.01      | 0.32                         | 0.37 | .45     |
| Constant                               | 0.97***                       | 0.11      | 0.74                         | 1.21 |                                             | 0.75***  | 0.11      | 0.53                         | 0.98 |                                         | 1.01***  | 0.06      | 0.88                         | 1.13 |         |
| SRM increases mitigation efforts       | 0.31***                       | 0.02      | 0.26                         | 0.36 | .38                                         | 0.34***  | 0.02      | 0.29                         | 0.38 | .40                                     | 0.37***  | 0.02      | 0.34                         | 0.41 | .41     |
| Constant                               | 0.78***                       | 0.09      | 0.59                         | 0.96 |                                             | 0.73***  | 0.03      | 0.67                         | 0.79 |                                         | 0.74***  | 0.05      | 0.64                         | 0.84 |         |
| SRM is positive for humans and nature  | 0.79***                       | 0.02      | 0.75                         | 0.84 | .76                                         | 0.83***  | 0.02      | 0.79                         | 0.87 | .80                                     | 0.85***  | 0.01      | 0.82                         | 0.88 | .77     |
| Constant                               | 0.90***                       | 0.08      | 0.73                         | 1.07 |                                             | 0.61***  | 0.12      | 0.35                         | 0.86 |                                         | 0.73***  | 0.09      | 0.55                         | 0.92 |         |
| SRM is inexpensive                     | 0.11***                       | 0.03      | 0.06                         | 0.17 | .13                                         | 0.08***  | 0.02      | 0.03                         | 0.13 | .09                                     | 0.14***  | 0.02      | 0.11                         | 0.18 | .18     |
| Constant                               | 1.15***                       | 0.14      | 0.86                         | 1.45 |                                             | 0.90***  | 0.12      | 0.64                         | 1.16 |                                         | 1.10***  | 0.07      | 0.95                         | 1.25 |         |
| SRM affects countries equally          | 0.34***                       | 0.03      | 0.28                         | 0.39 | .39                                         | 0.34***  | 0.02      | 0.30                         | 0.39 | .40                                     | 0.39***  | 0.02      | 0.35                         | 0.42 | .41     |

*Note.* CI=Confidence interval. LL=Lower level. UL=Upper level. Within a row, predictor  $\beta$ s that are, according to their CIs, significantly different from each other (i.e. significant differences between the Global South sample, ‘non-WEIRD’ sample from the Global North, or ‘WEIRD’ sample) are indicated through coloured cells. Dark blue cells indicate *B*s that are significantly larger and light blue cells indicate *B*s that are significantly smaller than the other *B*s. Non-coloured cells indicate *B*s that are not significantly different from the *B*s in the other samples. Significant differences in constants are not displayed. <sup>1</sup> Bonferroni corrected CIs. \*  $p \leq .05$ . \*\*  $p \leq .01$ . \*\*\*  $p \leq .001$ .

**Table E3b.** Associations between belief in global warming and perceptions about SRM with acceptability of SRM among the general public in the Global South, the ‘non-WEIRD’ Global North, and the ‘WEIRD’ Global North

|                                        | Global South (N=170) |      |                              |      | ‘Non-WEIRD’ Global North (N=373) |         |      |                              |      | ‘WEIRD’ Global North (N=1,705) |          |      |                              |       |         |
|----------------------------------------|----------------------|------|------------------------------|------|----------------------------------|---------|------|------------------------------|------|--------------------------------|----------|------|------------------------------|-------|---------|
|                                        | B                    | SE   | 99.667% Wald CI <sup>1</sup> |      | $\beta$                          | B       | SE   | 99.667% Wald CI <sup>1</sup> |      | $\beta$                        | B        | SE   | 99.667% Wald CI <sup>1</sup> |       | $\beta$ |
|                                        |                      |      | LL                           | UL   |                                  |         |      | LL                           | UL   |                                |          |      | LL                           | UL    |         |
| Constant                               | 0.63***              | 0.17 | 0.27                         | 0.99 |                                  | 0.01    | 0.28 | -0.59                        | 0.62 |                                | -0.35*** | 0.09 | -0.54                        | -0.15 |         |
| Belief in global warming               | 0.15                 | 0.11 | -0.08                        | 0.37 | .11                              | 0.06    | 0.09 | -0.13                        | 0.25 | .02                            | 0.30***  | 0.03 | 0.24                         | 0.37  | .21     |
| Constant                               | 0.43***              | 0.07 | 0.28                         | 0.57 |                                  | -0.01   | 0.08 | -0.17                        | 0.16 |                                | -0.03    | 0.07 | -0.17                        | 0.11  |         |
| SRM limits global warming              | 0.41***              | 0.06 | 0.28                         | 0.55 | .44                              | 0.55*** | 0.04 | 0.47                         | 0.63 | .61                            | 0.61***  | 0.02 | 0.57                         | 0.65  | .62     |
| Constant                               | 0.27                 | 0.16 | -0.07                        | 0.60 |                                  | 0.25    | 0.32 | -0.42                        | 0.93 |                                | 0.54***  | 0.09 | 0.36                         | 0.73  |         |
| SRM addresses causes of global warming | 0.32***              | 0.09 | 0.14                         | 0.51 | .28                              | 0.36*** | 0.04 | 0.28                         | 0.43 | .47                            | 0.45***  | 0.02 | 0.41                         | 0.49  | .52     |
| Constant                               | 0.97***              | 0.03 | 0.91                         | 1.04 |                                  | 0.39*   | 0.17 | 0.02                         | 0.77 |                                | 0.64***  | 0.09 | 0.45                         | 0.83  |         |
| SRM increases mitigation efforts       | 0.23***              | 0.06 | 0.10                         | 0.36 | .29                              | 0.50*** | 0.04 | 0.41                         | 0.59 | .53                            | 0.47***  | 0.02 | 0.43                         | 0.52  | .47     |
| Constant                               | 0.80***              | 0.01 | 0.78                         | 0.82 |                                  | 0.43*** | 0.06 | 0.30                         | 0.57 |                                | 0.52***  | 0.05 | 0.41                         | 0.64  |         |
| SRM is positive for humans and nature  | 0.76***              | 0.06 | 0.64                         | 0.88 | .72                              | 0.80*** | 0.03 | 0.74                         | 0.87 | .81                            | 0.93***  | 0.02 | 0.90                         | 0.96  | .83     |
| Constant                               | 1.00***              | 0.07 | 0.86                         | 1.14 |                                  | 0.45*   | 0.18 | 0.08                         | 0.82 |                                | 0.45***  | 0.09 | 0.27                         | 0.64  |         |
| SRM is inexpensive                     | 0.16*                | 0.07 | 0.00                         | 0.31 | .16                              | 0.29*** | 0.04 | 0.19                         | 0.38 | .31                            | 0.28***  | 0.02 | 0.23                         | 0.32  | .30     |
| Constant                               | 1.31***              | 0.06 | 1.18                         | 1.45 |                                  | 0.61*   | 0.27 | 0.05                         | 1.18 |                                | 0.78***  | 0.10 | 0.57                         | 0.99  |         |
| SRM affects countries equally          | 0.42***              | 0.06 | 0.30                         | 0.55 | .49                              | 0.50*** | 0.04 | 0.42                         | 0.58 | .57                            | 0.49***  | 0.02 | 0.45                         | 0.53  | .49     |

*Note.* CI=Confidence interval. LL=Lower level. UL=Upper level. Within a row, predictor  $\beta$ s that are, according to their CIs, significantly different from each other (i.e. significant differences between the Global South sample, ‘non-WEIRD’ sample from the Global North, or ‘WEIRD’ sample) are indicated through coloured cells. Dark blue cells indicate  $B$ s that are significantly larger and light blue cells indicate  $B$ s that are significantly smaller than the other  $B$ s. Non-coloured cells indicate  $B$ s that are not significantly different from the  $B$ s in the other samples. Significant differences in constants are not displayed. <sup>1</sup> Bonferroni corrected CIs. \*  $p \leq .05$ . \*\*  $p \leq .01$ . \*\*\*  $p \leq .001$ .
