# Supplementary material for: Public opinion about solar radiation management: A cross-cultural study in 20 countries around the world
Source: Springer Nature journal article supplement (doi:10.1007/s10584-024-03708-3), 2024-03-29
Supplement: MOESM6 [file 10584_2024_3708_MOESM6_ESM.pdf]

## **Supplementary information F of the paper Public opinion about solar radiation management: A cross-cultural study in 20 countries around the world**

### **Detailed results of the multiple regression analyses and generalised estimating equations**

#### **Content of Supplementary information F:**

- Table F1a. Belief in global warming and different perceptions about SRM uniquely explaining acceptability of SRM among students
- Table F1b. Belief in global warming and different perceptions about SRM uniquely explaining acceptability of SRM among the general public
- Table F2a. Belief in global warming and different perceptions about SRM uniquely explaining acceptability of SRM among students in the Global South, the ‘non-WEIRD’ Global North, and the ‘WEIRD’ Global North
- Table F2b. Belief in global warming and different perceptions about SRM uniquely explaining acceptability of SRM among the general public in the Global South, the ‘non-WEIRD’ Global North, and the ‘WEIRD’ Global North

**Table F1a.** Belief in global warming and different perceptions about SRM uniquely explaining acceptability of SRM among students

| Predictor                     | Global South                  |      |                         |      |         |                            |      |                         |      |         |                                     |      |                         |      |         |                            |      |                         |      |         |
|-------------------------------|-------------------------------|------|-------------------------|------|---------|----------------------------|------|-------------------------|------|---------|-------------------------------------|------|-------------------------|------|---------|----------------------------|------|-------------------------|------|---------|
|                               | Full sample ( $N=4,583$ )     |      |                         |      |         | Argentina ( $N=210$ )      |      |                         |      |         | Brazil ( $N=210$ )                  |      |                         |      |         | China ( $N=187$ )          |      |                         |      |         |
|                               | $B$                           | $SE$ | 99.737% CI <sup>1</sup> |      | $\beta$ | $B$                        | $SE$ | 99.737% CI <sup>1</sup> |      | $\beta$ | $B$                                 | $SE$ | 99.737% CI <sup>1</sup> |      | $\beta$ | $B$                        | $SE$ | 99.737% CI <sup>1</sup> |      | $\beta$ |
| Constant                      | 0.37***                       | 0.04 | 0.25                    | 0.49 |         | 0.04                       | 0.24 | -0.73                   | 0.88 |         | 0.76*                               | 0.18 | 0.26                    | 1.28 |         | 0.35                       | 0.14 | -0.10                   | 0.75 |         |
| Belief in global warming      | 0.10                          | 0.01 | 0.06                    | 0.13 | .06     | 0.35*                      | 0.09 | 0.05                    | 0.63 | .14     | -0.03                               | 0.06 | -0.24                   | 0.15 | -.02    | -0.01                      | 0.07 | -0.18                   | 0.24 | .00     |
| SRM limits global warming     | 0.21***                       | 0.01 | 0.18                    | 0.24 | .24     | 0.08                       | 0.05 | -0.08                   | 0.24 | .09     | 0.20*                               | 0.05 | 0.04                    | 0.36 | .22     | 0.21*                      | 0.07 | 0.00                    | 0.42 | .19     |
| SRM addresses causes of GW    | 0.06***                       | 0.01 | 0.03                    | 0.08 | .07     | 0.05                       | 0.03 | -0.05                   | 0.14 | .06     | 0.00                                | 0.03 | -0.09                   | 0.10 | .00     | 0.00                       | 0.04 | -0.13                   | 0.12 | .00     |
| SRM increases mitigation eff. | 0.02                          | 0.01 | -0.01                   | 0.04 | .02     | 0.00                       | 0.04 | -0.12                   | 0.11 | .00     | -0.03                               | 0.04 | -0.16                   | 0.08 | -.03    | -0.01                      | 0.05 | -0.16                   | 0.15 | -.01    |
| SRM positive humans/nature    | 0.65***                       | 0.01 | 0.61                    | 0.69 | .60     | 0.76*                      | 0.06 | 0.59                    | 0.92 | .77     | 0.73*                               | 0.06 | 0.56                    | 0.90 | .71     | 0.78*                      | 0.07 | 0.57                    | 1.00 | .73     |
| SRM is inexpensive            | -0.02***                      | 0.01 | -0.05                   | 0.00 | -.03    | 0.03                       | 0.03 | -0.07                   | 0.14 | .04     | 0.00                                | 0.04 | -0.11                   | 0.12 | .00     | -0.02                      | 0.04 | -0.14                   | 0.10 | -.03    |
| SRM affects countries equally | 0.01                          | 0.01 | -0.02                   | 0.03 | .01     | -0.05                      | 0.04 | -0.18                   | 0.09 | -.05    | 0.01                                | 0.06 | -0.17                   | 0.17 | .01     | 0.01                       | 0.05 | -0.16                   | 0.14 | .01     |
| Model fit                     | n.a.                          |      |                         |      |         | $R^2=.73, F(7,202)=76.58*$ |      |                         |      |         | $R^2=.74, F(7,202)=80.77*$          |      |                         |      |         | $R^2=.69, F(7,179)=57.96*$ |      |                         |      |         |
| Predictor                     | Global South (continued)      |      |                         |      |         |                            |      |                         |      |         | 'Non-WEIRD' Global North            |      |                         |      |         |                            |      |                         |      |         |
|                               | Iran <sup>2</sup> ( $N=193$ ) |      |                         |      |         | Nigeria ( $N=175$ )        |      |                         |      |         | Kazakhstan <sup>2</sup> ( $N=160$ ) |      |                         |      |         | Mexico ( $N=208$ )         |      |                         |      |         |
|                               | $B$                           | $SE$ | 99.737% CI <sup>1</sup> |      | $\beta$ | $B$                        | $SE$ | 99.737% CI <sup>1</sup> |      | $\beta$ | $B$                                 | $SE$ | 99.737% CI <sup>1</sup> |      | $\beta$ | $B$                        | $SE$ | 99.737% CI <sup>1</sup> |      | $\beta$ |
| Constant                      | 0.15                          | 0.16 | -0.36                   | 0.62 |         | 0.16                       | 0.09 | -0.11                   | 0.45 |         | 0.10                                | 0.11 | -0.24                   | 0.42 |         | 0.40                       | 0.17 | -0.06                   | 0.93 |         |
| Belief in global warming      | 0.12                          | 0.07 | -0.10                   | 0.34 | .09     | 0.15                       | 0.06 | -0.05                   | 0.35 | .15     | 0.19*                               | 0.06 | 0.01                    | 0.38 | .18     | 0.12                       | 0.07 | -0.13                   | 0.35 | .08     |
| SRM limits global warming     | 0.23*                         | 0.06 | 0.03                    | 0.41 | .27     | 0.26*                      | 0.05 | 0.10                    | 0.42 | .35     | 0.09                                | 0.06 | -0.09                   | 0.27 | .12     | 0.16                       | 0.07 | -0.02                   | 0.37 | .18     |
| SRM addresses causes of GW    | 0.18*                         | 0.05 | 0.02                    | 0.35 | .19     | -0.01                      | 0.05 | -0.15                   | 0.12 | -.02    | 0.08                                | 0.05 | -0.08                   | 0.26 | .10     | 0.05                       | 0.04 | -0.07                   | 0.17 | .07     |
| SRM increases mitigation eff. | 0.06                          | 0.05 | -0.09                   | 0.19 | .08     | -0.07                      | 0.06 | -0.23                   | 0.12 | -.08    | 0.11                                | 0.07 | -0.10                   | 0.30 | .13     | -0.02                      | 0.04 | -0.16                   | 0.12 | -.03    |
| SRM positive humans/nature    | 0.50*                         | 0.07 | 0.28                    | 0.71 | .49     | 0.52*                      | 0.08 | 0.27                    | 0.75 | .48     | 0.52*                               | 0.09 | 0.23                    | 0.83 | .52     | 0.61*                      | 0.07 | 0.40                    | 0.83 | .66     |
| SRM is inexpensive            | -0.06                         | 0.04 | -0.19                   | 0.06 | -.08    | -0.09                      | 0.04 | -0.20                   | 0.01 | -.13    | -0.08                               | 0.04 | -0.19                   | 0.05 | -.10    | -0.04                      | 0.04 | -0.14                   | 0.07 | -.04    |
| SRM affects countries equally | 0.07                          | 0.05 | -0.11                   | 0.22 | .08     | 0.04                       | 0.06 | -0.14                   | 0.21 | .04     | 0.04                                | 0.06 | -0.17                   | 0.24 | .05     | -0.04                      | 0.04 | -0.17                   | 0.08 | -.05    |
| Model fit                     | $R^2=.60, F(7,185)=39.36*$    |      |                         |      |         | $R^2=.55, F(7,167)=29.64*$ |      |                         |      |         | $R^2=.62, F(7,152)=34.74*$          |      |                         |      |         | $R^2=.63, F(7,200)=48.79*$ |      |                         |      |         |

(continued)

**Table F1a (continued).** Belief in global warming and different perceptions about SRM uniquely explaining acceptability of SRM among students

| Predictor                     | 'Non-WEIRD' Global North (continued) |           |                         |      |         |                                      |           |                         |      |         | 'WEIRD' Global North        |           |                         |      |         |                            |           |                         |      |         |
|-------------------------------|--------------------------------------|-----------|-------------------------|------|---------|--------------------------------------|-----------|-------------------------|------|---------|-----------------------------|-----------|-------------------------|------|---------|----------------------------|-----------|-------------------------|------|---------|
|                               | Russia ( <i>N</i> =217)              |           |                         |      |         | Taiwan <sup>2</sup> ( <i>N</i> =260) |           |                         |      |         | Turkey ( <i>N</i> =410)     |           |                         |      |         | Australia ( <i>N</i> =114) |           |                         |      |         |
|                               | <i>B</i>                             | <i>SE</i> | 99.737% CI <sup>1</sup> |      | $\beta$ | <i>B</i>                             | <i>SE</i> | 99.737% CI <sup>1</sup> |      | $\beta$ | <i>B</i>                    | <i>SE</i> | 99.737% CI <sup>1</sup> |      | $\beta$ | <i>B</i>                   | <i>SE</i> | 99.737% CI <sup>1</sup> |      | $\beta$ |
| Constant                      | 0.58*                                | 0.11      | 0.24                    | 0.94 |         | 0.59*                                | 0.13      | 0.15                    | 0.93 |         | 0.37                        | 0.15      | -0.05                   | 0.88 |         | 0.25                       | 0.30      | -0.74                   | 1.06 |         |
| Belief in global warming      | 0.07                                 | 0.05      | -0.07                   | 0.23 | .06     | -0.03                                | 0.05      | -0.19                   | 0.16 | -.02    | 0.05                        | 0.06      | -0.14                   | 0.22 | .02     | 0.12                       | 0.10      | -0.17                   | 0.43 | .06     |
| SRM limits global warming     | 0.18*                                | 0.04      | 0.06                    | 0.29 | .23     | 0.28*                                | 0.04      | 0.16                    | 0.41 | .31     | 0.25*                       | 0.04      | 0.14                    | 0.36 | .23     | 0.36*                      | 0.06      | 0.18                    | 0.54 | .37     |
| SRM addresses causes of GW    | 0.08*                                | 0.03      | 0.01                    | 0.16 | .13     | 0.07                                 | 0.03      | -0.02                   | 0.15 | .11     | 0.03                        | 0.03      | -0.04                   | 0.11 | .04     | -0.03                      | 0.04      | -0.15                   | 0.10 | -.04    |
| SRM increases mitigation eff. | 0.05                                 | 0.04      | -0.07                   | 0.18 | .06     | 0.04                                 | 0.04      | -0.07                   | 0.16 | .05     | -0.02                       | 0.03      | -0.10                   | 0.06 | -.02    | 0.11                       | 0.05      | -0.04                   | 0.24 | .12     |
| SRM positive humans/nature    | 0.66*                                | 0.06      | 0.48                    | 0.85 | .59     | 0.59*                                | 0.06      | 0.39                    | 0.78 | .57     | 0.75*                       | 0.04      | 0.61                    | 0.89 | .70     | 0.63*                      | 0.07      | 0.43                    | 0.86 | .61     |
| SRM is inexpensive            | 0.03                                 | 0.03      | -0.06                   | 0.10 | .04     | -0.06                                | 0.03      | -0.15                   | 0.02 | -.08    | 0.00                        | 0.02      | -0.07                   | 0.08 | .00     | 0.06                       | 0.04      | -0.08                   | 0.19 | .08     |
| SRM affects countries equally | 0.02                                 | 0.03      | -0.09                   | 0.11 | .02     | 0.01                                 | 0.04      | -0.10                   | 0.13 | .01     | 0.02                        | 0.03      | -0.06                   | 0.10 | .02     | -0.07                      | 0.05      | -0.24                   | 0.09 | -.08    |
| Model fit                     | $R^2=.62, F(7,152)=34.74*$           |           |                         |      |         | $R^2=.70, F(7,252)=82.95*$           |           |                         |      |         | $R^2=.73, F(7,402)=157.56*$ |           |                         |      |         | $R^2=.77, F(7,106)=49.51*$ |           |                         |      |         |

  

| Predictor                     | 'WEIRD' Global North (continued)      |           |                         |      |         |                                     |           |                         |      |         |                                           |           |                         |      |         |                                      |           |                         |      |         |
|-------------------------------|---------------------------------------|-----------|-------------------------|------|---------|-------------------------------------|-----------|-------------------------|------|---------|-------------------------------------------|-----------|-------------------------|------|---------|--------------------------------------|-----------|-------------------------|------|---------|
|                               | Ireland <sup>2</sup> ( <i>N</i> =139) |           |                         |      |         | Italy <sup>2</sup> ( <i>N</i> =173) |           |                         |      |         | Netherlands <sup>2</sup> ( <i>N</i> =211) |           |                         |      |         | Norway <sup>2</sup> ( <i>N</i> =441) |           |                         |      |         |
|                               | <i>B</i>                              | <i>SE</i> | 99.737% CI <sup>1</sup> |      | $\beta$ | <i>B</i>                            | <i>SE</i> | 99.737% CI <sup>1</sup> |      | $\beta$ | <i>B</i>                                  | <i>SE</i> | 99.737% CI <sup>1</sup> |      | $\beta$ | <i>B</i>                             | <i>SE</i> | 99.737% CI <sup>1</sup> |      | $\beta$ |
| Constant                      | 0.57                                  | 0.21      | 0.00                    | 1.25 |         | 0.33                                | 0.14      | -0.17                   | 0.76 |         | 0.74*                                     | 0.19      | 0.12                    | 1.21 |         | 0.69*                                | 0.14      | 0.29                    | 1.11 |         |
| Belief in global warming      | 0.17                                  | 0.09      | -0.11                   | 0.43 | .11     | -0.08                               | 0.06      | -0.27                   | 0.19 | -.04    | -0.05                                     | 0.08      | -0.22                   | 0.22 | -.03    | 0.03                                 | 0.05      | -0.13                   | 0.19 | .01     |
| SRM limits global warming     | 0.29*                                 | 0.05      | 0.13                    | 0.45 | .30     | 0.28*                               | 0.05      | 0.11                    | 0.45 | .32     | 0.20*                                     | 0.05      | 0.03                    | 0.36 | .22     | 0.21*                                | 0.03      | 0.11                    | 0.31 | .24     |
| SRM addresses causes of GW    | 0.07                                  | 0.04      | -0.08                   | 0.18 | .09     | 0.20*                               | 0.05      | 0.06                    | 0.34 | .25     | 0.06                                      | 0.03      | -0.05                   | 0.17 | .09     | 0.03                                 | 0.02      | -0.05                   | 0.10 | .04     |
| SRM increases mitigation eff. | 0.02                                  | 0.05      | -0.13                   | 0.18 | .02     | -0.02                               | 0.05      | -0.18                   | 0.16 | -.02    | -0.05                                     | 0.04      | -0.17                   | 0.06 | -.06    | 0.10*                                | 0.03      | 0.01                    | 0.19 | .11     |
| SRM positive humans/nature    | 0.59*                                 | 0.08      | 0.38                    | 0.81 | .53     | 0.61*                               | 0.08      | 0.39                    | 0.83 | .53     | 0.73*                                     | 0.08      | 0.50                    | 0.95 | .60     | 0.67*                                | 0.05      | 0.52                    | 0.81 | .57     |
| SRM is inexpensive            | -0.03                                 | 0.03      | -0.12                   | 0.07 | -.04    | -0.02                               | 0.04      | -0.15                   | 0.09 | -.03    | -0.06                                     | 0.04      | -0.17                   | 0.05 | -.07    | 0.01                                 | 0.02      | -0.07                   | 0.08 | .01     |
| SRM affects countries equally | 0.11                                  | 0.05      | -0.06                   | 0.29 | .11     | -0.04                               | 0.05      | -0.19                   | 0.11 | -.04    | 0.01                                      | 0.05      | -0.14                   | 0.16 | .01     | 0.05                                 | 0.03      | -0.05                   | 0.15 | .05     |
| Model fit                     | $R^2=.75, F(7,131)=55.25*$            |           |                         |      |         | $R^2=.82, F(7,165)=106.99*$         |           |                         |      |         | $R^2=.57, F(7,203)=38.95*$                |           |                         |      |         | $R^2=.65, F(7,433)=114.06*$          |           |                         |      |         |

(continued)

**Table F1a (continued).** Belief in global warming and different perceptions about SRM uniquely explaining acceptability of SRM among students

| Predictor                     | 'WEIRD' Global North (continued) |      |                         |      |      |                                  |      |                         |      |      |                                     |      |                         |      |      |                            |      |                         |      |      |
|-------------------------------|----------------------------------|------|-------------------------|------|------|----------------------------------|------|-------------------------|------|------|-------------------------------------|------|-------------------------|------|------|----------------------------|------|-------------------------|------|------|
|                               | Spain <sup>2</sup> (N=198)       |      |                         |      |      | Switzerland <sup>2</sup> (N=222) |      |                         |      |      | United Kingdom <sup>2</sup> (N=194) |      |                         |      |      | USA <sup>2</sup> (N=661)   |      |                         |      |      |
|                               | B                                | SE   | 99.737% CI <sup>1</sup> |      | β    | B                                | SE   | 99.737% CI <sup>1</sup> |      | β    | B                                   | SE   | 99.737% CI <sup>1</sup> |      | β    | B                          | SE   | 99.737% CI <sup>1</sup> |      | β    |
| LL                            |                                  |      | UL                      | LL   |      |                                  |      | UL                      | LL   |      |                                     |      | UL                      | LL   |      |                            |      | UL                      |      |      |
| Constant                      | 0.46                             | 0.35 | -0.81                   | 1.58 |      | 0.67‡                            | 0.21 | -0.06                   | 1.27 |      | 0.58‡                               | 0.13 | 0.15                    | 1.00 |      | 0.25‡                      | 0.07 | 0.04                    | 0.44 |      |
| Belief in global warming      | 0.07                             | 0.13 | -0.32                   | 0.52 | .02  | -0.02                            | 0.08 | -0.24                   | 0.30 | -.01 | 0.09                                | 0.06 | -0.08                   | 0.33 | .07  | 0.17‡                      | 0.03 | 0.08                    | 0.28 | .15  |
| SRM limits global warming     | 0.08                             | 0.06 | -0.12                   | 0.28 | .08  | 0.19‡                            | 0.05 | 0.04                    | 0.33 | .19  | 0.23‡                               | 0.06 | 0.05                    | 0.40 | .24  | 0.24‡                      | 0.03 | 0.15                    | 0.33 | .26  |
| SRM addresses causes of GW    | 0.11                             | 0.04 | -0.02                   | 0.27 | .14  | 0.01                             | 0.05 | -0.13                   | 0.14 | .01  | 0.11                                | 0.04 | -0.01                   | 0.22 | .15  | 0.04                       | 0.02 | -0.02                   | 0.10 | .05  |
| SRM increases mitigation eff. | -0.04                            | 0.05 | -0.22                   | 0.10 | -.05 | 0.16                             | 0.06 | -0.02                   | 0.33 | .14  | -0.03                               | 0.05 | -0.16                   | 0.12 | -.03 | 0.04                       | 0.02 | -0.03                   | 0.11 | .04  |
| SRM positive humans/nature    | 0.68‡                            | 0.06 | 0.47                    | 0.87 | .69  | 0.75‡                            | 0.07 | 0.51                    | 0.99 | .57  | 0.53‡                               | 0.07 | 0.32                    | 0.74 | .52  | 0.59‡                      | 0.03 | 0.49                    | 0.69 | .57  |
| SRM is inexpensive            | 0.01                             | 0.03 | -0.10                   | 0.11 | .01  | -0.07                            | 0.04 | -0.18                   | 0.04 | -.08 | -0.02                               | 0.03 | -0.12                   | 0.09 | -.02 | -0.01                      | 0.02 | -0.06                   | 0.04 | -.01 |
| SRM affects countries equally | 0.00                             | 0.04 | -0.11                   | 0.13 | .01  | 0.09                             | 0.06 | -0.08                   | 0.27 | .08  | 0.05                                | 0.05 | -0.08                   | 0.19 | .06  | 0.01                       | 0.02 | -0.07                   | 0.08 | .01  |
| Model fit                     | $R^2=.66, F(7,190)=53.47‡$       |      |                         |      |      | $R^2=.62, F(7,214)=49.92‡$       |      |                         |      |      | $R^2=.55, F(7,186)=33.06‡$          |      |                         |      |      | $R^2=.71, F(7,653)=229.29$ |      |                         |      |      |

Note. CI=Confidence interval. LL=Lower level. UL=Upper level. GW=Global warming. n.a.=not applicable as in generalized estimating equations no omnibus test is run. <sup>1</sup> The Bonferroni corrected CIs are Wald CIs in case of the full sample and BCa bootstrap CIs in case of the country samples. <sup>2</sup> Data were also collected among the general public. \*  $p \leq .05$ . \*\*  $p \leq .01$ . \*\*\*  $p \leq .001$ . ‡ Significant at the Bonferroni corrected BCa bootstrap  $p \leq .00278$ .

**Table F1b.** Belief in global warming and different perceptions about SRM uniquely explaining acceptability of SRM among the general public

| Predictor                     | Full sample ( <i>N</i> =2,248) |           |                         |      |         | Global South               |           |                         |      | 'Non-WEIRD' Global North    |                              |                         |                         |                         |         |                             |           |                         |      |         |
|-------------------------------|--------------------------------|-----------|-------------------------|------|---------|----------------------------|-----------|-------------------------|------|-----------------------------|------------------------------|-------------------------|-------------------------|-------------------------|---------|-----------------------------|-----------|-------------------------|------|---------|
|                               | <i>B</i>                       | <i>SE</i> | 99.737% CI <sup>1</sup> |      | $\beta$ | Iran ( <i>N</i> =170)      |           | 99.737% CI <sup>1</sup> |      | Kazakhstan ( <i>N</i> =141) |                              | 99.737% CI <sup>1</sup> |                         | Taiwan ( <i>N</i> =232) |         |                             |           |                         |      |         |
|                               |                                |           | LL                      | UL   |         | <i>B</i>                   | <i>SE</i> | LL                      | UL   | $\beta$                     | <i>B</i>                     | <i>SE</i>               | LL                      | UL                      | $\beta$ | <i>B</i>                    | <i>SE</i> | LL                      | UL   | $\beta$ |
| Constant                      | 0.24***                        | 0.05      | 0.10                    | 0.38 |         | 0.38                       | 0.17      | -0.13                   | 0.87 |                             | 0.44                         | 0.15                    | 0.00                    | 0.89                    |         | 0.47*                       | 0.14      | 0.03                    | 0.90 |         |
| Belief in global warming      | 0.09***                        | 0.02      | 0.04                    | 0.14 | .06     | 0.07                       | 0.08      | -0.16                   | 0.30 | .05                         | -0.14                        | 0.08                    | -0.39                   | 0.12                    | -.09    | -0.06                       | 0.06      | -0.24                   | 0.11 | -.03    |
| SRM limits global warming     | 0.17***                        | 0.01      | 0.13                    | 0.21 | .17     | 0.12                       | 0.07      | -0.07                   | 0.30 | .12                         | 0.21‡                        | 0.06                    | 0.03                    | 0.37                    | .28     | 0.23‡                       | 0.05      | 0.10                    | 0.35 | .22     |
| SRM addresses causes of GW    | 0.05***                        | 0.01      | 0.02                    | 0.09 | .06     | 0.11                       | 0.07      | -0.07                   | 0.31 | .09                         | 0.06                         | 0.06                    | -0.10                   | 0.22                    | .07     | -0.08                       | 0.03      | -0.18                   | 0.03 | -.10    |
| SRM increases mitigation eff. | 0.02                           | 0.01      | -0.03                   | 0.06 | .02     | -0.03                      | 0.05      | -0.17                   | 0.13 | -.03                        | 0.02                         | 0.08                    | -0.18                   | 0.28                    | .02     | 0.11                        | 0.05      | -0.02                   | 0.24 | .12     |
| SRM positive humans/nature    | 0.74***                        | 0.02      | 0.68                    | 0.80 | .67     | 0.69*                      | 0.09      | 0.42                    | 0.97 | .65                         | 0.47*                        | 0.10                    | 0.19                    | 0.78                    | .46     | 0.72*                       | 0.06      | 0.55                    | 0.89 | .75     |
| SRM is inexpensive            | -0.03*                         | 0.01      | -0.06                   | 0.01 | -.02    | -0.01                      | 0.06      | -0.17                   | 0.17 | -.01                        | -0.03                        | 0.05                    | -0.20                   | 0.10                    | -.04    | 0.03                        | 0.03      | -0.06                   | 0.13 | .04     |
| SRM affects countries equally | 0.00                           | 0.02      | -0.05                   | 0.04 | .01     | 0.01                       | 0.08      | -0.22                   | 0.20 | .01                         | 0.12                         | 0.07                    | -0.08                   | 0.32                    | .15     | -0.03                       | 0.04      | -0.14                   | 0.08 | -.03    |
| Model fit                     | n.a.                           |           |                         |      |         | $R^2=.55, F(7,162)=28.40*$ |           |                         |      |                             | $R^2=.61, F(7,133)=29.13*$   |                         |                         |                         |         | $R^2=.79, F(7,224)=122.64*$ |           |                         |      |         |
|                               | 'WEIRD' Global North           |           |                         |      |         |                            |           |                         |      |                             |                              |                         |                         |                         |         |                             |           |                         |      |         |
|                               | Ireland ( <i>N</i> =191)       |           |                         |      |         | Italy ( <i>N</i> =168)     |           |                         |      |                             | Netherlands ( <i>N</i> =262) |                         |                         |                         |         | Norway ( <i>N</i> =207)     |           |                         |      |         |
|                               |                                |           | 99.737% CI <sup>1</sup> |      |         |                            |           | 99.737% CI <sup>1</sup> |      |                             |                              |                         | 99.737% CI <sup>1</sup> |                         |         |                             |           | 99.737% CI <sup>1</sup> |      |         |
| Predictor                     | <i>B</i>                       | <i>SE</i> | LL                      | UL   | $\beta$ | <i>B</i>                   | <i>SE</i> | LL                      | UL   | $\beta$                     | <i>B</i>                     | <i>SE</i>               | LL                      | UL                      | $\beta$ | <i>B</i>                    | <i>SE</i> | LL                      | UL   | $\beta$ |
| Constant                      | 0.51*                          | 0.14      | 0.08                    | 0.93 |         | 0.12                       | 0.10      | -0.13                   | 0.53 |                             | 0.26                         | 0.10                    | -0.02                   | 0.54                    |         | 0.52*                       | 0.14      | 0.10                    | 0.93 |         |
| Belief in global warming      | 0.06                           | 0.06      | -0.11                   | 0.24 | .04     | 0.06                       | 0.04      | -0.13                   | 0.16 | .04                         | 0.15‡                        | 0.05                    | 0.02                    | 0.29                    | .12     | 0.10                        | 0.05      | -0.05                   | 0.29 | .08     |
| SRM limits global warming     | 0.17*                          | 0.06      | 0.01                    | 0.34 | .18     | 0.18*                      | 0.05      | 0.03                    | 0.32 | .20                         | 0.23*                        | 0.05                    | 0.10                    | 0.36                    | .25     | 0.03                        | 0.04      | -0.08                   | 0.15 | .04     |
| SRM addresses causes of GW    | 0.01                           | 0.04      | -0.12                   | 0.14 | .01     | 0.12                       | 0.04      | -0.02                   | 0.25 | .15                         | 0.04                         | 0.03                    | -0.06                   | 0.13                    | .04     | 0.12*                       | 0.03      | 0.03                    | 0.20 | .14     |
| SRM increases mitigation eff. | 0.05                           | 0.05      | -0.09                   | 0.18 | .05     | 0.05                       | 0.04      | -0.08                   | 0.17 | .05                         | -0.04                        | 0.04                    | -0.16                   | 0.10                    | -.04    | 0.01                        | 0.04      | -0.12                   | 0.13 | .01     |
| SRM positive humans/nature    | 0.78*                          | 0.07      | 0.56                    | 0.99 | .68     | 0.69*                      | 0.07      | 0.48                    | 0.86 | .63                         | 0.75*                        | 0.06                    | 0.56                    | 0.94                    | .62     | 0.88*                       | 0.05      | 0.73                    | 1.03 | .74     |
| SRM is inexpensive            | 0.00                           | 0.04      | -0.12                   | 0.12 | .00     | -0.12*                     | 0.04      | -0.23                   | 0.00 | -.13                        | -0.04                        | 0.04                    | -0.15                   | 0.07                    | -.04    | 0.01                        | 0.03      | -0.09                   | 0.09 | .01     |
| SRM affects countries equally | 0.02                           | 0.05      | -0.13                   | 0.16 | .01     | 0.06                       | 0.05      | -0.08                   | 0.22 | .07                         | 0.09                         | 0.04                    | -0.03                   | 0.22                    | .08     | 0.01                        | 0.04      | -0.11                   | 0.15 | .01     |
| Model fit                     | $R^2=.73, F(7,183)=69.03*$     |           |                         |      |         | $R^2=.80, F(7,160)=91.56*$ |           |                         |      |                             | $R^2=.73, F(7,254)=96.98*$   |                         |                         |                         |         | $R^2=.73, F(7,199)=78.47*$  |           |                         |      |         |

(continued)

**Table F1b (continued).** Belief in global warming and different perceptions about SRM uniquely explaining acceptability of SRM among the general public

| Predictor                     | 'WEIRD' Global North (continued) |      |                         |      |      |                            |      |                         |      |      |                           |      |                         |      |      |                            |      |                         |      |      |
|-------------------------------|----------------------------------|------|-------------------------|------|------|----------------------------|------|-------------------------|------|------|---------------------------|------|-------------------------|------|------|----------------------------|------|-------------------------|------|------|
|                               | Portugal <sup>2</sup> (N=167)    |      |                         |      |      | Spain (N=195)              |      |                         |      |      | Switzerland (N=96)        |      |                         |      |      | United Kingdom (N=187)     |      |                         |      |      |
|                               | B                                | SE   | 99.737% CI <sup>1</sup> |      | β    | B                          | SE   | 99.737% CI <sup>1</sup> |      | β    | B                         | SE   | 99.737% CI <sup>1</sup> |      | β    | B                          | SE   | 99.737% CI <sup>1</sup> |      | β    |
| Constant                      | -0.14                            | 0.21 | -0.72                   | 0.50 |      | 0.20                       | 0.22 | -0.36                   | 0.94 |      | 0.55*                     | 0.17 | 0.02                    | 1.04 |      | 0.15                       | 0.11 | -0.18                   | 0.44 |      |
| Belief in global warming      | 0.29                             | 0.10 | 0.02                    | 0.55 | .16  | 0.11                       | 0.09 | -0.18                   | 0.31 | .05  | -0.01                     | 0.07 | -0.21                   | 0.26 | -.01 | 0.17*                      | 0.06 | 0.02                    | 0.34 | .13  |
| SRM limits global warming     | 0.11                             | 0.09 | -0.16                   | 0.38 | .11  | 0.19*                      | 0.05 | 0.05                    | 0.35 | .19  | 0.23*                     | 0.07 | 0.01                    | 0.43 | .20  | 0.11                       | 0.07 | -0.07                   | 0.32 | .11  |
| SRM addresses causes of GW    | -0.02                            | 0.04 | -0.14                   | 0.12 | -.03 | 0.14                       | 0.05 | 0.00                    | 0.28 | .17  | 0.14                      | 0.06 | -0.03                   | 0.29 | .13  | 0.01                       | 0.06 | -0.15                   | 0.17 | .01  |
| SRM increases mitigation eff. | -0.08                            | 0.06 | -0.26                   | 0.08 | -.10 | 0.09                       | 0.05 | -0.06                   | 0.21 | .10  | 0.04                      | 0.08 | -0.22                   | 0.31 | .03  | 0.05                       | 0.07 | -0.17                   | 0.26 | .05  |
| SRM positive humans/nature    | 0.84*                            | 0.08 | 0.62                    | 1.06 | .84  | 0.60*                      | 0.06 | 0.42                    | 0.79 | .58  | 0.90*                     | 0.09 | 0.64                    | 1.16 | .70  | 0.83*                      | 0.09 | 0.53                    | 1.08 | .72  |
| SRM is inexpensive            | -0.05                            | 0.04 | -0.17                   | 0.08 | -.05 | 0.02                       | 0.04 | -0.13                   | 0.14 | .02  | -0.05                     | 0.06 | -0.25                   | 0.12 | -.05 | -0.05                      | 0.04 | -0.16                   | 0.07 | -.06 |
| SRM affects countries equally | -0.02                            | 0.06 | -0.18                   | 0.13 | -.02 | -0.10                      | 0.05 | -0.25                   | 0.05 | -.12 | 0.03                      | 0.07 | -0.16                   | 0.27 | .03  | -0.05                      | 0.05 | -0.20                   | 0.08 | -.05 |
| Model fit                     | $R^2=.70, F(7,159)=53.60*$       |      |                         |      |      | $R^2=.70, F(7,187)=63.73*$ |      |                         |      |      | $R^2=.83, F(7,88)=61.36*$ |      |                         |      |      | $R^2=.68, F(7,179)=55.36*$ |      |                         |      |      |

  

| Predictor                     | 'WEIRD' Global North (continued) |      |                         |      |      |
|-------------------------------|----------------------------------|------|-------------------------|------|------|
|                               | United States of America (N=232) |      |                         |      |      |
|                               | B                                | SE   | 99.737% CI <sup>1</sup> |      | β    |
| Constant                      | 0.13                             | 0.09 | -0.13                   | 0.40 |      |
| Belief in global warming      | 0.10                             | 0.04 | -0.02                   | 0.22 | .08  |
| SRM limits global warming     | 0.12                             | 0.06 | -0.05                   | 0.29 | .12  |
| SRM addresses causes of GW    | -0.01                            | 0.05 | -0.16                   | 0.14 | -.01 |
| SRM increases mitigation eff. | -0.01                            | 0.05 | -0.16                   | 0.15 | -.01 |
| SRM positive humans/nature    | 0.87*                            | 0.07 | 0.62                    | 1.06 | .79  |
| SRM is inexpensive            | -0.02                            | 0.04 | -0.15                   | 0.09 | -.03 |
| SRM affects countries equally | -0.02                            | 0.05 | -0.17                   | 0.12 | -.01 |
| Model fit                     | $R^2=.76, F(7,224)=99.18*$       |      |                         |      |      |

Note. CI=Confidence interval. LL=Lower level. UL=Upper level. GW=Global warming. n.a.=not applicable as in generalized estimating equations no omnibus test is run. <sup>1</sup> The Bonferroni corrected CIs are Wald CIs in case of the full sample and BCa bootstrap CIs in case of the country samples. <sup>2</sup> Data were only collected among the general public. \*  $p \leq .05$ . \*\*  $p \leq .01$ . \*\*\*  $p \leq .001$ . \* Significant at the Bonferroni corrected BCa bootstrap  $p \leq .0045$ .

**Table F2a.** Belief in global warming and different perceptions about SRM uniquely explaining acceptability of SRM among students in the Global South, the ‘non-WEIRD’ Global North, and the ‘WEIRD’ Global North

|                                        | Global South ( <i>N</i> =975) |           |                                 |         |         | ‘Non-WEIRD’ Global North ( <i>N</i> =1,255) |           |                                 |        |         | ‘WEIRD’ Global North ( <i>N</i> =2,353) |           |                                 |       |         |
|----------------------------------------|-------------------------------|-----------|---------------------------------|---------|---------|---------------------------------------------|-----------|---------------------------------|--------|---------|-----------------------------------------|-----------|---------------------------------|-------|---------|
|                                        | <i>B</i>                      | <i>SE</i> | 99.667% Wald<br>CI <sup>1</sup> |         | $\beta$ | <i>B</i>                                    | <i>SE</i> | 99.667% Wald<br>CI <sup>1</sup> |        | $\beta$ | <i>B</i>                                | <i>SE</i> | 99.667% Wald<br>CI <sup>1</sup> |       | $\beta$ |
|                                        |                               |           | LL                              | UL      |         |                                             |           | LL                              | UL     |         |                                         |           | LL                              | UL    |         |
| Constant                               | 0.35***                       | 0.07      | 0.19                            | 0.51    |         | 0.37***                                     | 0.06      | 0.23                            | 0.50   |         | 0.39***                                 | 0.06      | 0.26                            | 0.52  |         |
| Belief in global warming               | 0.12***                       | 0.03      | 0.06                            | 0.17    | .08     | 0.09***                                     | 0.02      | 0.04                            | 0.14   | .05     | 0.09***                                 | 0.02      | 0.05                            | 0.13  | .05     |
| SRM limits global warming              | 0.20***                       | 0.02      | 0.16                            | 0.24    | .23     | 0.19***                                     | 0.02      | 0.15                            | 0.22   | .23     | 0.23***                                 | 0.01      | 0.20                            | 0.26  | .25     |
| SRM addresses causes of global warming | 0.04*                         | 0.02      | 0.01                            | 0.07    | .06     | 0.05***                                     | 0.01      | 0.03                            | 0.08   | .07     | 0.06***                                 | 0.01      | 0.04                            | 0.08  | .08     |
| SRM increases mitigation efforts       | -0.005                        | 0.02      | -0.05                           | 0.04    | -.004   | 0.005                                       | 0.02      | -0.03                           | 0.04   | .01     | 0.03*                                   | 0.01      | 0.002                           | 0.06  | .04     |
| SRM is positive for humans and nature  | 0.65***                       | 0.03      | 0.59                            | 0.71    | .62     | 0.67***                                     | 0.02      | 0.62                            | 0.73   | .64     | 0.63***                                 | 0.02      | 0.59                            | 0.67  | .58     |
| SRM is inexpensive                     | -0.03*                        | 0.02      | -0.07                           | -0.0003 | -.05    | -0.03*                                      | 0.01      | -0.06                           | 0.0001 | -.04    | -0.02                                   | 0.01      | -0.04                           | 0.004 | -.02    |
| SRM affects countries equally          | -0.01                         | 0.02      | -0.06                           | 0.03    | -.01    | -0.01                                       | 0.02      | -0.05                           | 0.03   | .001    | 0.02                                    | 0.01      | -0.01                           | 0.05  | .03     |

*Note.* CI=Confidence interval. LL=Lower level. UL=Upper level. Within a row, predictor *B*s that are, according to their CIs, significantly different from each other (i.e. significant differences between the Global South sample, ‘non-WEIRD’ sample from the Global North, or ‘WEIRD’ sample) are indicated through coloured cells. Dark blue cells indicate *B*s that are significantly larger and light blue cells indicate *B*s that are significantly smaller than the other *B*s. Non-coloured cells indicate *B*s that are not significantly different from the *B*s in the other samples. Significant differences in constants are not displayed. <sup>1</sup> Bonferroni corrected CIs. \*  $p \leq .05$ . \*\*  $p \leq .01$ . \*\*\*  $p \leq .001$ .

**Table F2b.** Belief in global warming and different perceptions about SRM uniquely explaining acceptability of SRM among the general public in the Global South, the ‘non-WEIRD’ Global North, and the ‘WEIRD’ Global North

|                                        | Global South ( <i>N</i> =170) |           |                                 |      |         | ‘Non-WEIRD’ Global North ( <i>N</i> =373) |           |                                 |       |         | ‘WEIRD’ Global North ( <i>N</i> =1,705) |           |                                 |       |         |
|----------------------------------------|-------------------------------|-----------|---------------------------------|------|---------|-------------------------------------------|-----------|---------------------------------|-------|---------|-----------------------------------------|-----------|---------------------------------|-------|---------|
|                                        | <i>B</i>                      | <i>SE</i> | 99.667% Wald<br>CI <sup>1</sup> |      | $\beta$ | <i>B</i>                                  | <i>SE</i> | 99.667% Wald<br>CI <sup>1</sup> |       | $\beta$ | <i>B</i>                                | <i>SE</i> | 99.667% Wald<br>CI <sup>1</sup> |       | $\beta$ |
|                                        |                               |           | LL                              | UL   |         |                                           |           | LL                              | UL    |         |                                         |           | LL                              | UL    |         |
| Constant                               | 0.38*                         | 0.16      | 0.04                            | 0.71 |         | 0.52***                                   | 0.10      | 0.30                            | 0.74  |         | 0.20***                                 | 0.06      | 0.08                            | 0.32  |         |
| Belief in global warming               | 0.07                          | 0.08      | -0.10                           | 0.23 | .05     | -0.08                                     | 0.05      | -0.18                           | 0.02  | -.06    | 0.11***                                 | 0.02      | 0.07                            | 0.15  | .08     |
| SRM limits global warming              | 0.12*                         | 0.06      | -0.01                           | 0.24 | .12     | 0.23***                                   | 0.03      | 0.17                            | 0.30  | .25     | 0.16***                                 | 0.02      | 0.13                            | 0.19  | .16     |
| SRM addresses causes of global warming | 0.11                          | 0.07      | -0.04                           | 0.25 | .09     | -0.04                                     | 0.03      | -0.09                           | 0.018 | -.02    | 0.05***                                 | 0.01      | 0.024                           | 0.08  | .07     |
| SRM increases mitigation efforts       | -0.03                         | 0.05      | -0.13                           | 0.08 | -.03    | 0.08*                                     | 0.04      | 0.01                            | 0.16  | .08     | 0.01                                    | 0.02      | -0.02                           | 0.05  | .01     |
| SRM is positive for humans and nature  | 0.69***                       | 0.09      | 0.51                            | 0.87 | .65     | 0.65***                                   | 0.04      | 0.56                            | 0.75  | .64     | 0.78***                                 | 0.02      | 0.72                            | 0.83  | .69     |
| SRM is inexpensive                     | -0.01                         | 0.05      | -0.12                           | 0.10 | -.01    | 0.01                                      | 0.03      | -0.04                           | 0.07  | .003    | -0.04**                                 | 0.01      | -0.06                           | -0.01 | -.04    |
| SRM affects countries equally          | 0.01                          | 0.07      | -0.13                           | 0.15 | .01     | -0.01                                     | 0.04      | -0.08                           | 0.07  | .01     | -0.01                                   | 0.02      | -0.04                           | 0.03  | .003    |

*Note.* CI=Confidence interval. LL=Lower level. UL=Upper level. Within a row, predictor *B*s that are, according to their CIs, significantly different from each other (i.e. significant differences between the Global South sample, non-WEIRD sample from the Global North, or WEIRD sample) are indicated through coloured cells. Dark blue cells indicate *B*s that are significantly larger and light blue cells indicate *B*s that are significantly smaller than the other *B*s. Non-coloured cells indicate *B*s that are not significantly different from the *B*s in the other samples. Significant differences in constants are not displayed. <sup>1</sup> Bonferroni corrected CIs. \*  $p \leq .05$ . \*\*  $p \leq .01$ . \*\*\*  $p \leq .001$ .
